# Supplementary material for: Research on Selected Wildlife Infections in the Circumpolar Arctic—A Bibliometric Review
Source: MDPI journal article supplement (doi:10.3390/ijerph191811260), 2022-09-07
Supplement: s1 [file File S1.xlsx]

## Sheet: Mammals_Eng
Article ID	Title	Year of Publication	Journal	Country	Region/ Province	City/ Town	Animal(s)	Multiple animals:	Infectious Agent Group (i.e. Bacteria, parasite, virus) or Multiple if several infections	Infection(s)	Multiple infections	Objective of article	Main results	Arctic* or not	Notes
1	Wet belly in reindeer (Rangifer tarandus tarandus) in relation to body condition, body temperature and blood constituents	2002	Journal of Wildlife Diseases	Canada	Northwest Territories, Labrador, British Columbia, and Alberta		Multiple	Wild ruminants: Caribou, white-tailed deer, mose, musk-oxen	Virus	Bluetongue virus		To determine C-ELISA cut-off values for wild ruminants to detect bluetongue virus	Results show potential for use in serodiagnosis	Arctic
2	Serologic evidence of puumala virus infection in wild moose in Northern Sweden	2000	American Journal of Tropical Medicine and Hygiene	Sweden	Northern Sweden		Moose		Virus	Puumala virus		To find serologic evidence of hantavirus infection in Swedish moose	5/260 moose had serologic evidence of Puumala virus infection, suggesting low seroprevalence	Arctic
3	Sylvatic trichinella spp. infection in Finland	2010	Journal of Parasitology	Finland	different parts of the country		Multiple	Lynx, brown bear, wolf, raccoon dog, red fox	Parasite	Trichinella spp.		To describe Trichinella spp. infections in wild Finnish mammals and to analyze infection intensity among species and populations	Raccoon dogs and red foxes are most important resevoirs for sylvatic Trichinella spp. infections	Arctic
4	Serosurvey for canine distemper virus, canine adenovirus, Leptospira interrogans, and Toxoplasma gondii in free-ranging canids in Scandinavia and Svalbard	2010	Journal of Wildlife Diseases	Multiple	Scandinavia and Svalbard		Multiple	Canids: Red fox, arctic fox, wolf	Multiple	Virus, parasite: Canine distemper virus (CDV), canine adenovirus type 1 (CAV-A), Leptospira interrogans serovars Canicola and Icterohaemorrhagiae, Toxoplasma gondii		To determine prevalence of several infections in wild canid species	Varying prevalences reported by species and infection, high prevalence CAV-1 red fox, wolves, and arctic fox, varying prevalence for T. gondii, CDV and CAV-1 are endemic in red foxes and wolves	Arctic
6	The role of parasites in the dynamics of a reindeer population	2002	The Royal Society	Norway	Svalbard	Nordenskiöldland, Spitsbergen	Reindeer		Parasite	Ostertagia gruehneri		To evaluate antihelminth treatment in reindeer, assess helminth effect on reindeer fecundity, and model parasite role in reindeer populations	Treatment increases chance of having a calf, model suggests parasite mediates fecundity in reindeer populations	Arctic
7	Multiplex TaqMan qPCR assay for specific identification of encapsulated Trichinella species prevalent in North America	2018	Mem Inst Oswaldo Cruz	United States	Several states including Alaska		Multiple	Game meat samples: walrus, bear, boar, mountain lion, deer	Parasite	Trichinella spp.		To develop and assess efficacy og multiplex TaqMan qPCR in detecting and differentiating different Trichinella spp.	This method is a quick way to detect North American trichinella spp.	Arctic
9	Trichinella spiralis prevalence among wildlife of a boreal region rapidly reduced in the absence of spillover from the domestic cycle	2018	Veterinary Parasitology	Finland	NA, perhaps around the country		Multiple	Lynx, raccoon dog, red fox, wolf, brown bear, pine marten, badger, otter, polecat, wolverine, mink	Parasite	Trichinella spp.		To investiage prevalence of Trichinella spp. in wild canids	Results support hypothesis of spillover into wildlife from domestic pigs, reduction of trichinella spp. in wildlife is statistically significant	Arctic
10	Gastrointestinal nematodes depress food intake in naturally infected reindeer	1995	Parasitology	Norway	Northern Norway		Reindeer		Parasite	Hypoderma tarandi, Cephenomya trompe, Linguatula arctica		To determine if naturally occuring nematode infections supress reindeer appetite	Results suggest that parasites may have impact on reindeer feeding	Arctic
11	Serosurvey for Trichinella in polar bears (Ursus maritimus) from Svalbard and the Barents Sea	2010	Veterinary Parasitology	Norway	Svalbard and Barents Sea		Polar bears		Parasite	Trichinella spp.		To assess prevalence of Trichinella antibodies in polar bears	No change in prevalence rates over time observed, prevalence increases with age, correlations between anti-T. gondii and anti-Trichinall spp. antibodies	Arctic
12	Serosurvey for antibodies against Salmonella species in free-ranging moose (Alces alces) from Norway	2003	Berliner und Munchener tierärztliche Wochenschrift	Norway	six different areas of Norway: Nordland, Hedmark, Troms, Trondelag counties		Moose		Bacteria	Salmonella spp.		To determine seroprevalence for Salmonella spp. in Norwegian moose	First evidence of Salmonella seropositve moose	Arctic
14	Bacteria of pathogenic importance in faeces from cadavers of free-ranging or corralled semi-domesticated reindeer in northern Norway	2003	Veterinary Research Communications	Norway	Northern Norway		Reindeer		Bacteria	Campylobacter spp., Clostridium perfringens, Listeria spp., Salmonella spp., Yersinia spp.		To determine prevalence of microorganisms in reindeer that died in the winter in 2000	Shiga-toxin isolated for first time from reindeer in Norway, 44% of wild and 90% of corraled reindeer positive for C. perfringes	Arctic
17	Seroprevalence of Salmonella spp. in wild reindeer (Rangifer tarandus tarandus) in Iceland	2004	Veterinary Research Communications	Iceland			Reindeer		Bacteria	Salmonella spp.		To determine seroprevalence of Salmonella spp. in reindeer in Iceland		Arctic
18	Factors affecting the distribution and transmission of Elaphostrongylus rangiferi (Protostrongylidae) in caribou (Rangifer tarandus caribou) of Newfoundland, Canada	2001	Canadian Journal of Zoology	Canada	Newfoundland		Reindeer		Parasite	Elaphostrongylus rangiferi		To determine effect of herd density and climatic factors on cerebrospinal elaphostrongylosis in reindeer herds	Results suggest E. rangiferi abundance is highest in February and cases of CSE are more likely with moderate summer temperature and mild winter	Not	Arctic animal
19	Rabies and canine distemper in an arctic fox population in Alaska	2001	Journal of Wildlife Diseases	United States	Alaska	Prudhoe Bay	Arctic Fox		Virus	Rabies and Canine Distemper		To test for prevalence of rabies and canine distemper in Arcic fox population	Exposure to rabies in 5/99 foxes, only 1 had rabies virus in neural tissue, no evidence of canine distemper	Arctic
20	Assessment of serum antibody titers against canine distemper virus, canine adenovirus type II, and canine parvovirus in Alaskan sled dogs before and after a long-distance race	2008	Journal of the American Veterinary Medical Association	United States	Alaska		Sled dog		Virus	CDV, CAV-2, canine parvovirus (CPV)		To determine serum antibody levels for CDV, CAV-2, and CPV in sled dogs before and after the Iditarod race	Increases in serum after race, but no clinical signs. Suggest dogs may be exposed in course	Arctic
21	First case of chronic wasting disease in Europe in a Norwegian free-ranging reindeer	2016	Veterinary Research	Norway	Southern Norway		Reindeer		Prion	Chronic wasting disease (CWD)		To report on the first case of CWD in Europe in a free-ranging reindeer	Prevalence is unknown because of low number of infections	Arctic
22	An analysis of the parasites of a mid-winter population of the Snowshoe Hare, Lepus americanus, on insular Newfoundland during a cyclical peak	2005	Canadian Field Naturalist	Canada	Western Newfoundland, North Shore, Avalon Forest		Snowshoe hare		Parasite	cestodes Mosgovoyia pectinata, Taenia pisiformis, nematodes Obeliscoides cuniculi, Rauschia triangularis		To examine enteric parasite prevalence in Snowshoe hares	No significant differences in prevalences were found among discovered parasites, expansion of coyote into region may be reason	Arctic
23	Necrotizing encephalitis of unknown cause in Fennoscandian Arctic foxes (Alopex lagopus)	2007	J Vet Diagn Invest	Sweden	NA		Arctic fox		Unknown	Necrotizing encephalitis (NE)		To describe an outbreak of necrotizing encephalitis in a colony of arctic foxes	Cause of disease is unknown. Tests for T. gondii, Encephalitozoon cuniculi, Neospora caninum, CDV, ravies, adenovirus 1, Borno disease virus, and Listestia monocytogenes were negative	Arctic
24	Echinococcus multilocularis infection in Russia and neighbouring countries	1998		Russia	Yakutia, Chukot, Korjak a. a., Kamchatka, Omsk, Tomsk, and Altai		Multiple	Arctic fox and common fox (among others)	Parasite	Echinococcus multilocularis		To describe E. multilocularis hosts in Russia and surrounding countries		Arctic	Received a print from library
26	Correlates between feeding ecology and mercury levels in historical and modern arctic foxes (Vulpes lagopus)	2013	PLoS ONE	Russia	Kamchatka - Commander Islands (Mednyi and Bering Islands)		Arctic Fox		Multiple	Parasite, virus, bacteria: Toxoplasma gondii, Neospora caninum, Canine Parvovirus and Canine Distemper, Brucella spp, Herpesvirus, Morbillivirus, Calicivirus, Reovirus		To assess if pathogens and pollutants were changing between historic and modern popualtions	Changes in feeding structure may be more important than exposre, low prevalence of pathogens found	Arctic
27	Prevalence of Trichinella sp. in polar bears (Ursus maritimus) from northeastern Greenland	1990	Polar Research	Greenland	Northeastern Greeland		Polar bears		Parasite	Trichinella spp.		To determine Trichinella spp. prevalence in polar bears	12/38 bears (32%) were infected with Trichinella, prevalence increased with bear age	Arctic
28	Evaluation of a serological test (indirect ELISA) for the diagnosis of sarcoptic mange in red foxes (Vulpes vulpes)	2007	Veterinary Dermatology	Sweden	different parts of the country		Red Fox		Parasite	Sarcoptes scabiei		To evaluate the indirect ELISA for detecting S. scabiei antibodies in red foxes	Results suggest this test is useful for diagnosis of S. scabiei in red foxes	Arctic
31	Helminths of brown bears (Ursus arctos) in the Kola Peninsula	2017	Parasitology Research	Russia	Murmansk Region	Kola Peninsula	Brown Bears		Parasite	Parasite: trematode Dicrocoelium spp., cestodes Diphyllobothrium spp., Anoplocephalidae spp., nematodes Capillariidae, Baylisascaris spp. Strongylida 1 and Strongylida 2		To explore the helminth composition in brown bears	43/93 fecal samples contained parasites which were identified to use to determine prevalence and diversity of parasites in brown bears of the Kola Peninsula	Arctic
34	Sarcocystis arctica (Apicomplexa: Sarcocystidae): ultrastructural description and its new host record, the Alaskan wolf (Canis lupus)	2016	Parasitology Research	United States	Alaska		Wolves		Parasite	Sarcocystis arctica		To describe a new host for S. arctica	First time to be found in a wolf, structure is described	Arctic
36	Salmonella shedding in racing sled dogs	1997	J Vet Diagn Invest	United States	Alaska		Sled dog		Bacteria	Salmonella spp.		To identify some of the infectious agents associtated with diarrhea in sled dogs competing in the Iditarod	High prevalence of Salmonella reported	Arctic
37	Introduction of canine parvovirus 2 into wildlife on the Island of Newfoundland, Canada	2017	Infection, Genetics and Evolution	Canada	Newfoundland		Multiple	Red fox, lynx, coyotes	Virus	Canine parvovirus-2 and Feline panleukopenia (FPV)		To investigate the parvovirus prevalence in Newfoundland	CPV-2 was not found in lynx or fox (low prevalence in coyote) and results suggest FPV is not circulating in Newfoundland	Arctic
38	Little impact of over-winter parasitism on a free-ranging ungulate in the high Arctic	2017	Functional Ecology	Norway	Svalbard		Reindeer		Parasite	nematodes Ostertagia gruehneri, Marshallagia marshalli		To test to effect of an antihelminth drug on reindeer pregnancy and body mass	Little effect of antihleminth on reideer body mass or pregnancy rates over winter	Arctic
39	Development and application of a delayed-release anthelmintic intra-ruminal bolus system for experimental manipulation of nematode worm burdens	2012	Parasitology	Norway	Svalbard		Reindeer		Parasite	Marshallagia marshalli		To test the impact of delayed antihelminth treatment on reindeer fitness	Results suggest that this antihelminth adminitration system works well, lower worm burdens with treatment than with control	Arctic
40	The seasonal timing of Snowshoe Hare Virus transmission on the island of Newfoundland, Canada	2017	Journal of Medical Entomology	Canada	Newfoundland		Hares		Virus	Snowshoe hare virus		To detect Snowshoe Hare Virus in wild snowshoe hares	The timing of the seroconversion to a sentinel rabbit corresponded with the peak mosquito collections	Arctic
44	Antibodies to canine distemper and phocine distemper viruses in polar bears from the Canadian Arctic	2004	Journal of Wildlife Diseases	Canada	Western Hudson Bay and Lancaster Sound		Polar bears		Virus	Canine Distemper and Phocine morbillivirus, formerly Phocine distemper virus (PDV)		To compare antibodies for CDV and PDV in two populations of polar bears	48/200 positive for CDV, 6/200 positive for PDV, differences in antibody prevalence for CDV in populations	Arctic
45	Morphological and molecular characterization of Sarcocystis arctica-like sarcocysts from the Arctic fox (Vulpes lagopus) from Alaska, USA	2017	Parasitology Research	United States	Alaska		Arctic Fox		Parasite	Sarcocystis arctica-like sarcocytes		To report Sarcocystis arctica-like sarcocysts in muscles from Arctic fox in Alaska for the first time	Results suggest sarcocysts are common in fox tongues, suggesting arctic fox is intermediate host and ultrastructure of S. arctica is provided for the first time	Arctic
49	Serological survey of selected canine viral pathogens and zoonoses in grizzly bears (Ursus arctos horribilis) and black bears (Ursus americanus) from Alaska	1998	Rev. Sci. Tech.	United States	Alaska		Bears	Grizzly and American Black bears	Multiple	Parasite, bacteria, virus: Brucella, Canine distemper, Canine infectious hepatitis, Canine parvovirus, Trichinella, Francisella tularensis		To investigate the prevalence of canine viruses and zoonoses in bears	Results for multiple infection prevalences given for both grizzly and black bears	Arctic
50	Serologic survey of Toxoplasma gondii in grizzly bears (Ursus arctos) and black bears (Ursus americanus), from Alaska, 1988 to 1991	1995	Journal of Wildlife Diseases	United States	Alaska	Kodiak Island, northern Alaska	Bears	Grizzly and American Black bears	Parasite	Toxoplasma gondii		To investigate the prevalence of T. gondii in bear populations	Prevalence varies by location, high antibody titers above Arctic circle in Grizzly bears	Arctic
51	Rabies in a cat in Greenland	2006	Ugeskrift for laeger	Greenland					Virus	Rabies		Article describes the first case of rabies diagnosed in a cat in Greenland. Rabies is enzootic in Greenland, the arctic fox being the natural host of rabies virus		Arctic	Article in Danish
53	Filter-paper blood samples for elisa detection of brucella antibodies in caribou	2011	Journal of Wildlife Diseases	Canada	Nunavut	Coral Harbor on Southampton Island	Caribou		Bacteria	Brucella		To evaluate filter-paper blood samples for detecting Brucella spp. antibodies in caribou	Results are similar to gold standard, suggesting useful diagnositc method for hunters and disease surveillance	Arctic
54	Gammaherpesvirus infection in semidomesticated reindeer (Rangifer Tarandus Tarandus): A cross-sectional, serologic study in northern Norway	2013	Journal of Wildlife Diseases	Norway	Northern Norway	Finnmark	Reindeer		Virus	Gammaherpesvirus		To evaluate the prevalence of gammaherpesvirus in reindeer being slaughtered in Finnmark	Overall low antibody prevalence (3.5%)	Arctic
55	Cervid herpesvirus 2 causes respiratory and fetal infections in semidomesticated reindeer	2009	Journal of Clinical Microbiology	Norway	Northern Norway	Finnmark	Reindeer		Virus	Cervid herpesvirus 2		To investigate the prevalence of CHV-2 in reindeer populations and to evaluate the effect on respiratory and fetal infections	Results indicate the CVH-2 is endemic in this reindeer population, can be transmitted horizontally and vertically	Arctic
56	Evaluation of three commercial bovine ELISA kits for detection of antibodies against Alphaherpesviruses in reindeer (Rangifer tarandus tarandus)	2009	Acta Veterinaria Scandinavica	Norway	Northern Norway	Finnmark	Reindeer		Virus	Alphaherpesvirus		To evaluate the effectiveness of 3 commerically available ELISA kits for detection of alphaherpesvirus antibodies in reindeer	results show thay the bovine gB blocking ELISA kit can be used ti screen reindeer cheaply and quickly	Arctic
57	Alphaherpesvirus infections in semidomesticated reindeer: A cross-sectional serological study	2009	Veterinary Microbiology	Norway	Northern Norway	Finnmark	Reindeer		Virus	Alphaherpesvirus		To determine the prevalence of CvHV-2 in reindeer herds in Finnmark	Results show seroprevalence is about 48% of the reindeer population, suggesting CvHV-2 is endemic in reindeer populations in northern Norway	Arctic
58	Long-term study of Sarcoptes scabiei infection in Norwegian red foxes (Vulpes vulpes) indicating host/parasite adaptation	2008	Veterinary Parasitology	Norway	Different parts of the country incl northern Norway		Red Fox		Parasite	Sarcoptes scabiei		To investigate the prevalence of sarcoptic mange in red foxes	Results show mange prevalence decreased by threefold (30.3% to 6.6% while seroprevalence dropped from 53.3% to 19.1%)	Arctic
59	Prevalence of Trichinella larvae and extra-intestinal nematodes in Norwegian red foxes (Vulpes vulpes)	2006	Veterinary Parasitology	Norway	Different parts of the country incl northern Norway		Red Fox		Multiple	Trichinella, nematodes Capillaria böhmi, Capillaria aerophila, Crenosoma vulpis, Capillaria plica, Angiostrongylus vasorum (not detected)		To present the prevalences of extra-intestinal nematodes and Trichinella in foxes	Prevalences vary by parasite and location	Arctic
61	Identification of Dictyocaulus spp. in ruminants by morphological and molecular analyses	2002	Journal of Wildlife Diseases	Sweden	NA		Multiple	Roe deer, moose, fallow deer, red deer, reindeer	Parasite	Dictyocaulus spp.		To determine species composition and prevalence of Dictyocaulus lungworms in Swedish hosts	Varying prevalences reported, overall prevalence 12.2%	Arctic
62	Comparison of gross visual and microscopic assessment of four anatomic sites to monitor besnoitia tarandi in barren-ground caribou (rangifer tarandus)	2012	Journal of Wildlife Diseases	Multiple	Canada and Alaska		Caribou		Parasite	Besnoitia tarandi		To develop a standard protocol for monitoring Besnoitia tarandi prevalence in caribou	Microscopic evaluation of skin from anterior aspect of mid-third portion of the matatarsal region could be used as a standard indicator	Arctic
63	Variables associated with besnoitia tarandi prevalence and cyst density in barren-ground caribou (rangifer tarandus) populations	2013	Journal of Wildlife Diseases	Canada	Quebec		Caribou		Parasite	Besnoitia tarandi		To compare Besnoita tarandi prevalence between two herds of caribou	Differences in prevalcene between age, sex, time of harves, and herds were observed	Not	Species of the Arctic
67	Estimating Toxoplasma Gondii Exposure in Arctic Foxes (Vulpes Lagopus) while Navigating the Imperfect World of Wildlife Serology	2016	Journal of Wildlife Diseases	Canada	Nunavut		Arctic fox		Parasite	Toxoplasma gondii		To compare different diagnotic tests for determining T. gondii prevalence among Arctic fox	Detection probability was highest with indirect fluorescent antibody tests and lower for direct agglutination test and ELISA	Arctic
68	Evidence of alphaherpesvirus infections in Alaskan caribou and reindeer	2012	Veterinary Research	United States	Alaska	Nome, Wales, Mulchatna, Tesekpuk, and Western Arctic	Caribou		Virus	Alphaherpesvirus		To determine if CvHV-2 was present in Alaskan caribou	Overal seroprevalence was about 60% suggesting that Alaskan reindeer are infected with an alphaherpesvirus	Arctic
70	Escaping parasitism in the selfish herd: Age, size and density-dependent warble fly infestation in reindeer	2007	Oikos	Norway	Northern Norway	Finnmark	Reindeer		Parasite	Hypoderma tarandi		To test if reindeer behavior plays a role in evading parasitic infection	Group behavior does affect level of parasitism from warble flies	Arctic	More about group behavior to avoid insect parasitism, prevalence mentioned and northern animal
72	Rangiferine brucellosis on Baffin Island	1997	Journal of Wildlife Diseases	Canada	Nunavut	Baffin Island	Caribou		Bacteria	Brucella		To determine the prevalence of rangiferine brucellosis on Baffin Island	Prevlanece varied by herd popualation and age, but not by sex.	Arctic
74	Serological evidence of morbillivirus infection in polar bears (Ursus maritimus) from Alaska and Russia	1996	Veterinary Record	Multiple	Alaska and Russia	Bering, Chukchi, and East Siberian seas	Polar bears		Virus	Morbillivirus		To determine the prevalence of morbillivirus anitbodies in polar bears	35.6% (68/186) polar bears had positive morbillivirus antibody titers, high prevalence suggest morbillivirus is endemic in this region of the Arctic	Arctic
76	Parasite avoidance: the cause of post-calving migrations in Rangifer?	1990	Canadian Journal of Zoology	Norway	Finnmark		Reindeer		Parasite	Hypoderma tarandi		To determine if larval abundance in reindeer varied according to distance from post-calving ground	Results suggest post-calving migration may be a behavioural adaptation that reduces parasite levers	Arctic	More about group behavior to avoid insect parasitism, northern animal
77	Transmission of brucellosis from reindeer to cattle	1993	Journal of the American Veterinary Medical Association				Multiple	Reindeer and Cattle	Bacteria	Brucella suis biovar		To determine if reindeer infected with Brucella could infect cattle	Results suggest that cattle can become infected by sharing the same agricultial area, even after the reindeer have been removed	Arctic
78	Detection of Mycobacterium avium subspecies paratuberculosis in several herds of Arctic Caribou (Rangifer tarandus ssp.)	2012	Journal of Wildlife Diseases	Multiple	Greenland and Canada		Caribou		Bacteria	Mycobacterium avium subspecies paratuberculosis		To investigate the prevalence of MAP in migratory carbiou herds	Proportion of positive animals was high in Akia-Maniitsoq herd in Greenland, Riviere-aux-Feuilles and Riviere-George hers in northeastern Canada (23.4%, 11.5%, and 10.0%)	Arctic
79	Spatial distribution of Echinococcus multilocularis, Svalbard, Norway	2008	Emerging Infectious Diseases	Norway	Svalbard		Arctic Fox		Parasite	Echinococcus multilocularis		To determine spatial distribution on infection for human and arctic foxes	The results show that the area occupied by Arctic foxes are associated with increased risk for humans	Arctic
81	Morbillivirus ecology in polar bears (Ursus maritimus)	2000	Polar Biology	Multiple	Alaska and Russia		Polar bears		Virus	Phocine distemper virus (PDV), dolphin morbillibirus (DMV), Porpoise morbillivirus (PMV)		To determine the predominant virus infecting polar bears	Polar bears had a higher serum antibody titers to CDV than the marine morbilliviruses, suggestign terrestrial viral exposure	Arctic
82	Parasites in grizzly bears from the central Canadian Arctic	1999	Journal of Wildlife Diseases	Canada	Northwest Territories		Grizzly bears		Parasite	Nematodirus, Cystoisospora, Strongylus, Diphyllobothrium, Baylisascaris		To evaluate parasite prevalence and diversity in gastrointestinal parasites in grizzly bears	Prevalence varied by season, prevalences for multiple parasites included	Arctic
83	Descriptive epizootiological study of European brown hare syndrome in Sweden.	1993	Journal of Wildlife Diseases	Sweden	Southern, Central and Norrland	x	Hares		Virus	European brown hare syndrome		To study the epizoology of the Eurpopean Brown Hare ssyndrome in Sweden between 1980-1989	2818 hares were autopsied- prevalence rates between 3%-23.2%	Arctic
85	An improved method for the extraction and quantification of adult Echinococcus from wildlife definitive hosts	2013	Parasitology Research	Canada	British Columbia and the Northwest Territories		Multiple	Wolves, coyotes, red foxes	Parasite	Echinococcus		To evaulaute a new method for the extraction and quantification of Echinococcus	The filtration and counting technique maintains sensitivity, with increased efficency compared to the standard scraping and counting mthod	Arctic
86	Removal of lipid from serum increases coherence between brucellosis rapid agglutination test and enzyme-linked immunosorbent assay in bears in Alaska, USA	2016	Journal of Wildlife Diseases	United States	Alaska		Bears	Grizzly and brown bears	Bacteria	Brucella		To address a potntial technical problem in brucella detecting methods in bears	Results suggest that removal of lipid from serum increases coherence between tests, and suggest that Alaskan brown bears have been exposed to Brucella spp.	Arctic
87	Molecular identification of Trichinella isolates from wildlife animals of the Russian Arctic territories	2017	Helminthologia	Russia	Chukotka Peninsula and Arkhangelsk Oblast		Multiple	Polar bear, wolverine, arctic fox, ringed seal, brown bear, cat, seld dog, domestic pig, and northern sea lion	Parasite	Trichinella spp.		To explore the presence of Trichinella in wildlife animals in the Russian Arctic territories	Trichinella was detected in wildlife species	Arctic
89	Epidemiology of the lymphatic-dwelling filarioid nematode Rumenfilaria andersoni in free-ranging moose (Alces alces) and other cervids of North America	2016	Parasites & Vectors	United States	Alaska, Minnesota, Montana, Washington, Maine, and New Hampshire	x	Moose		Parasite	Rumenfilaria andersoni		To investigate the epidemiology of Rumenfilaria andersoni in north American moose	Rumenfilaria is present in about 40.7% n=27 Alaskan moose, and in 0 of the Alaska caribou surveyed	Arctic
90	The third newly discovered Eimeria species (Protozoa: Eimeriidae) described from wild reindeer, Rangifer tarandus, in Iceland	2006	Parasitology Research	Iceland	Eastern Iceland		Reindeer		Parasite	Eimeria hreindyria		To describe a new species of Eimeria species in Icelandic reindeer	Low prevalence (1.8%) rate in Iceland	Arctic
91	Description of a new Eimeria species and redescription of Eimeria mayeri (Protozoa: Eimeriidae) from wild reindeer Rangifer tarandus in Iceland	2005	Journal of Parasitology	Iceland	Eastern Iceland		Reindeer		Multiple	Parasite: Eimeria mayeri and Eimeria rangiferis		To describe a new species of Eimeria species in Icelandic reindeer	Low prevalence of E. mayeri (1-4%)	Arctic
93	Serological evidence of Besnoitia spp. infection in Canadian wild ruminants and strong cross-reaction between Besnoitia besnoiti and Besnoitia tarandi	2012	Veterinary Parasitology	Canada	northern regions of Western Canada		Reindeer		Parasite	Besnoitia spp.		To investigate the cross-reaction between B. besnoiti and B. tarandi	Cross-reactivity detected between B. besnoiti and B. tarandi, suggesting that the serologic assays can be used in large scale prevalence studies	Arctic
94	The annual, temporal and spatial pattern of Setaria tundra outbreaks in Finnish reindeer: a mechanistic transmission model approach	2018	Parasites & Vectors	Finland	Lapland		Reindeer		Parasite	Setaria tundra		To develop a model to quantify the role of temperature in S. tundra transmaitioon and to describe the pattern of outbreaks	Model shows that only one generation of transmission can occur each season because of temperature, but increasing temperature may permit range expansion and more effective transmission	Arctic
95	Parasites, biodiversity, and population dynamics in an ecosystem in the high arctic	1999	Veterinary Parasitology	Norway	Svalbard	Nordenskiöldland, Spitsbergen	Reindeer		Parasite	Ostertagia gruehneri, Marshalligia marshalli, Teladorsagia circumcincta. In detail: Ostertagia gruehneri m. gruehneri, O. gruehneri m. arcticus, Marshallagia marshalli m. marshalli, M. marshalli. m. occidentalis, Teladorsagia circumcincta m. circumcincta, T. circumcincta. m. trifurcata, and T. circumcincta. m. davtiani		To analyze the parasite diversity in Svalbard reindeer	Reindeer fat content relates to parasite burden, varies by season	Arctic
96	Evidence for continued transmission of parasitic nematodes in reindeer during the Arctic winter	1999	International Journal for Parasitology	Norway	Svalbard		Reindeer		Parasite	Nematodes		To examine the relationship between season and parasite tranmission	Evidence suggests parasite transmission occurs throughout the winter, burden levels off with host increasing age	Arctic
97	Occurrence of Giardia and Cryptosporidium in Norwegian red foxes (Vulpes vulpes)	2007	Veterinary Parasitology	Norway	Different parts of the country incl northern Norway		Arctic Fox		Parasite	Giardia and Cryptosporidium		To investigate the presence of Giardia and Cryptosporidium in Arctic foxes	Cryptosporidium was detected in 6 (2.2%) of foxes and Giardia was detected in 13 (4.8%) of the foxes.	Arctic
98	Prevalence of Cryptosporidium and Giardia in free-ranging wild cervids in Norway	2006	Veterinary Parasitology	Norway	Different parts of the country		Multiple	Wild cervids: moose, red deer, roe deer, and reindeer	Parasite	Giardia and Cryptosporidium		To investigate the prevalence of Giardia and Cryptoposidium in wild cervids	Cryptosporidium found in 15/ 455 moose (3.3%), not found in reindeer (0/155). Giardia found in 56 (12.3%) moose and 11 (7.1%) reindeer.	Arctic
101	Ixodes ricinus infestation in free-ranging cervids in Norway--a study based upon ear examinations of hunted animals	2013	Veterinary Parasitology	Norway	Different parts of the country		Multiple	Wild cervids: moose, red deer, and roe deer	Parasite	Ixodes ricinus tick		To determine the prevalence and abundance of ticks on cervid ears	Prevalence was highest in August and September, gradually decreasing through winter, 8920 ticks collected from 403/ 603 animals. Most ticks were nymphal ticks (74%), higher proportion of adult ticks found in moose	Arctic
102	Outbreaks of clinical cerebrospinal Elaphostrongylosis in reindeer (Rangifer tarandus tarandus) in Finnmark, Norway, and their relation to climatic conditions	2010 (this might be 1994)	Journal of Veterinary Medicine	Norway	Northern Norway	Finnmark	Reindeer		Parasite	Elaphostrongylus rangiferi		To compare the relationship between CSE outbreaks and climatic conditions	High temperatures the previous summer were highly association with outbreaks, heavy rainfall was moderately associated.	Arctic
104	Prevalence of Encephalitozoon cuniculi antibodies in terrestrial mammals in Iceland, 1986 to 1989.	1993	Journal of Wildlife Diseases	Iceland			Multiple	Arctic fox, feral mink, wood mice, and house mic	Parasite	Encephalitozoon cuniculi		TO determine the prevalence of E. cuniculi antibodies in terrestrial mammals	41/372 (12%) Arctic fox had antibodies present, and one cub had neurologic symptoms indicative of encephalitozoonosis	Arctic
105	Francisella tularensis in muscle from diseased hares - a risk factor for humans?	2017	Epidemiology and Infection	Sweden			Hare		Bacteria	Francisella tularensis		To invesitgate if hares with tularemia had F. tularensis in muscle	40/43 hares had bacteria in the muscle	Arctic
106	Echinococcus granulosus in Finland	2003	Veterinary Parasitology	Finland	Eastern Finland	including the north	Multiple	Wolves, reindeer, elk, dogs	Parasite	Echinococcus multilocularis		To investigate intermediate hosts for E. multilocularis in Finland	Reindeer prevalence has slightly increased, but is still very low (<0.013%), first report of wolves acting as a definitive host, with prevalence in 30%, no evidence that E. multilocularis has spread to dogs in reindeer herding area	Arctic
107	Transuterine infection by Baylisascaris transfuga: Neurological migration and fatal debilitation in sibling moose calves (Alces alces gigas) from Alaska	2018	IJP: Parasites and Wildlife	United States	Alaska		Moose		Parasite	Baylisascaris transfuga		To report on case of B. transfuga in sibling moose calves	Discovery of fatal neural infection in a mammal could serve as a predictor for zoonotic potential	Arctic
108	Naturally occurring Brucella suis biovar 4 infection in a moose (Alces alces).	1993	Journal of Wildlife Diseases	Canada	Northwest Territories	MacKenzie River	Moose		Bacteria	Brucella suis biovar		To report on potentially first case of B. suis biovar 4 in a moose, commonly found in caribou		Arctic
109	Population dynamics of nematode parasites of reindeer in the sub-arctic	2006	Veterinary Parasitology	Finland	Northern Finland		Reindeer		Parasite	Nematodirinae - Nematodirius tarandi, Nematodirella longispiculata, Trichostrongylidae - Ostertagia gruehneri, Trichuridae - Capillaria sp.		To examine the neatode parasite populations in reindeer	O. gruehneri was the most abundance parasite, results show that paarasite transmiassion occurs throughout the year	Arctic
110	Is there a cost of parasites to caribou?	2009	Parasitology	Canada	Nunavut		Caribou		Parasite	Nematodes Strongyloides spp., Hypoderma tarandi		To examine the effects of parasite infection in reindeer well-being	Increased nematode burden in females corresponded with a decreased body weight, and increased warble abundance	Arctic
111	Campylobacter hyointestinalis subsp. hyointestinalis, a common Campylobacter species in reindeer	2002	Journal of Applied Microbiology	Finland	Northern Finland		Reindeer		Bacteria	Campylobacter spp.		To determine the prevalence of Campylobacter spp. in fecal material of reindeer	24/399 (6%) were positive for Campylobacter, C. hyointestinalis subsp. Hyointestinalis was the only species isolated from reindeer	Arctic
112	Life-history strategies and population dynamics of abomasal nematodes in Svalbard reindeer (Rangifer tarandus platyrhynchus)	2000	Parasitology	Norway	Svalbard		Reindeer		Parasite	Nematodes Trichostrongylus spp. - Marshallagia marshalli, Ostertagia gruehneri,		To explore the population dynamics and life history of nematodes in reindeer	Marshallagia marshalli was the most abundant parasite, nematode counts increase in winter, O. gruehneri may play a role in population dynamics	Arctic
115	Seroprevalences of Toxoplasma gondii and Neospora caninum in Swedish red foxes (Vulpes vulpes)	2001	Veterinary Parasitology	Sweden	different parts of the country		Red Fox		Parasite	Toxoplasma gondii and Neospora caninum		To determien the prevlance of T. gondii and N. caninum antibodies in Swedish red foxes	84/221 (38%) were seropositive for T. gondii, 0% positive for N. caninum	Arctic
119	Serum biochemistry, serology, and parasitology of boreal caribou (Rangifer tarandus caribou) in the Northwest Territories, Canada	2010	Journal of Wildlife Diseases	Canada	Northwest Territories		Caribou		Multiple	Toxoplasma gondii, Mycobacterium avium subspecies paratuberculosis, Cryptosporidium sp., Giardia sp., Eimeria sp., Trypanosoma sp.		To report on the health of caribou and report seroprevalences for multiple infections	Multiple infection seroprevalences given, as well as new reports of Eimeria sp. Cryptosporidium sp. And Giardia sp. Not previously recorded in boreal caribou	Arctic
120	Serologic investigations of canine parvovirus and canine distemper in relation to wolf (Canis lupus) pup mortalities.	1994	Journal of Wildlife Diseases	Multiple	Alaska, NWT at Canada and others		Wolves		Virus	Virus: Canine Parvovirus and Canine Distemper		To report on serolgic evidence for CPV and CDV exposure in wolves	Prevalences given by infection	Arctic
121	Natural toxoplasma gondii infections in european brown hares and mountain hares in finland: Proportional mortality rate, antibody prevalence, and genetic characterization	2011	Journal of Wildlife Diseases	Finland	different parts of the country		Hares	European brown hares and mountain hares	Parasite	Toxoplasma gondii		To determine antibody prevalence for T. gondii in hares	All cases of fatal toxoplasmosis had high titers, but, non of the 107 EBH and 4 (4%) og 96 MH that died of other causes were antibody positive	Arctic	Only two cases in the Arctic
122	Toxoplasma gondii in wild cervids and sheep in Finland: north-south gradient in seroprevalence	2010	Veterinary Parasitology	Finland	different parts of the country		Multiple	Wild cervids: moose, white-tailed deer, roe deer) and sheep	Parasite	Toxoplasma gondii		To determine seroprevalence of T. gondii in wild cervids and sheep	Seropositive samples in 116/1215 (9.6%) moose, seroprevalence was lower in the north and highest in the south, Other species prevalence given too	Arctic
124	Evidence of herpesvirus infection in woodland caribou in Saskatchewan	2003	Journal of Wildlife Diseases	Canada	Saskatchewan		Caribou		Multiple	Virsu, bacteria: Brucella spp. Leptospira interrogans, bovine viral diarrhea virus, and bovine herpesvirus-1		To report on seroprevlaences of multiple pathogens in woodland caribou	First report of herpesvirus in isolated populations of woodland caribou in Canada	Not	Important arctic migrating species
125	Occurrence and prevalence of Clostridium perfringens in polar bears from Svalbard, Norway	2008	Journal of Wildlife Diseases	Norway	Svalbard		Polar bears		Bacteria	Clostridium perfringens		To obtain insight into occureance and prevalence of C. perfringens in polar bears	40/92 (44%) samples positive with C. perfringens, data suggest the C. perfringens type A is a normal inhabitants of polar bear GI tract	Arctic
126	Morphological keys to advance the understanding of protostrongylid biodiversity in caribou (Rangifer spp.) at high latitudes	2017	International Journal for Parasitology: Parasites and Wildlife	Canada	Central and high Arctic		Reindeer		Parasite	Protostrongylid		To examine the protostrongylid prevlaence and intensity in Arctic reindeer	Prevlance and intensity low on arctic mainland and southern Victoria Island, but absent from high arctic islands, new geographic and host record for P. andersoni infection	Arctic
127	Brucellosis in Siberia and the Far East	1995	Med Parazitol (Mosk).	Russia	Siberia and Far East		Reindeer		Bacteria	Brucella		To examine brucellosis in Siberia and the Far East		Arctic	Article in Russian
128	Epidemiologic and zoogeographic studies on Trichinella nativa in arctic fox, Alopex lagopus, in Greenland	1996	Comparative Parasitology	Greenland			Arctic Fox		Parasite	Trichinella spp.		To examine the prevalence of Trichinella in Arctic foxes in Greenland	16/266 (6%) foxes were infected, highest prevlaence in north (9%) and eastern (35%) Greenland, where polar bears are hunted and sledge dogs are common	Arctic
129	Trichinella infections in arctic foxes from greenland: Studies and reflections on predilection sites of muscle larvae	1995	Journal of Helminthology	Greenland			Arctic Fox		Parasite	Trichinella spp.		To inestiage where musclar larvae were most common	Highest number of larvae found in muscles of the eyes and legs	Arctic
130	Gastrointestinal helminths of arctic foxes (Alopex lagopus) from different bioclimatological regions in Greenland	1996	Journal of Parasitology	Greenland			Arctic Fox		Parasite	GI Helminths		To explore the GI helminths present in Greenland Arctic foxes	Prevalences varied by area, differs geographically	Arctic	GI Helminths: Parasite missing from table
131	New bedding site examination-based method to analyse deer ked (Lipoptena cervi) infection in cervids	2008	Parasitology Research	Finland	Rantsila, Kuusamo, Nurmes, Ristijärvi, Suomussalmi and Hyrynsalmi		Reindeer		Parasite	Deer ked (Lipoptena cervi)		To test a new method for analyzing deer ked infecions in cervids	Chronic deer ked infections cause reddish-borwn snow discoloration in bedding sites, which can be used in moitoring and predicting parasite infections	Arctic
132	Pestivirus and alphaherpesvirus infections in Swedish reindeer (Rangifer tarandus tarandus L.)	2012	Veterinary Microbiology	Sweden	Northern Sweden		Reindeer		Virus	Virus: Pestivirus and alphaherpesvirus		To examine prevalence of antibodies to several viruses in Swedish reindeer	Prevalence of antibodies to bovine viral diarrhea (32%), bovine herpes virus 1 (53%), of 1158 reindeer	Arctic
134	Campylobacter spp., Enterococcus spp., Escherichia coli, Salmonella spp., Yersinia spp., and Cryptosporidium oocysts in semi-domesticated reindeer (Rangifer tarandus tarandus) in Northern Finland and Norway	2006	Acta Veterinaria Scandinavica	Multiple	Fenoscandia: Northern Finland and Norway	x	Reindeer		Bacteria	Enterpathogenic bacteria: Campylobacter spp., Enterococcus spp., Escherichia coli, Salmonella spp., Yersinia spp.		To assess fecal shedding of zoonotic enteropathogens in reindeer	Multiple pathogen prevalences reported	Arctic
135	Prevalence of Sarcocystis spp. in two subspecies of caribou (Rangifer tarandus) in Newfoundland and Labrador, and foxes (Vulpes vulpes), wolves (Canis lupus), and husky dogs (Canis familiaris) as potential definitive hosts	2006	Journal of Parasitology	Canada	Newfoundland and Labrador		Multiple	Caribou, Foxes, Wolves, and Husky dogs	Parasite	Sarcocystis spp.		To investigate the prvalence and distribution of Sarcocystis spp. in Newfoundland	Over 50% of barren-ground caribou infected, but 99% of woodland caribou infected, 27/32 red foxes, 15/15 wolves, and 22/38 huskys infected	Not	Important arctic migrating species
137	A conceptual model for the impact of climate change on fox rabies in Alaska, 1980-2010	2014	Zoonoses Public Health	United States	Alaska		Fox	Red fox and Arctic fox	Virus	Rabies		To create a model for the effect of climate change on rabies in foxes	Warmer temperatures could decrease arctic fox, but increase red fox, making red fox primary reservoir in region	Arctic
140	Characterisation of parapoxviruses isolated from Norwegian semi-domesticated reindeer (Rangifer tarandus tarandus)	2005	Virology Journal	Norway			Reindeer		Virus	Parapoxvirus		To characterize parapoxvirus responsible for contagious ecthyma in reindeer	Results suggest parapoxvirus causing contagious ecthyma in reindeer is same species of orf virus that crosses species barrier from sheep to goat	NA	Important arctic migrating species
141	Infectious Canine Hepatitis in a Brown Bear ( Ursus arctos horribilis) from Alaska, USA	2018	Journal of Wildlife Diseases	United States	Alaska		Bear	Brown bear	Virus	Canine hepatitis		To report on a case of infectious canine hepatitis in a brown bear cub		Arctic
143	Serendipitous discovery of a novel protostrongylid (Nematoda: Metastrongyloidea) in caribou, muskoxen, and moose from high latitudes of North America based on DNA sequence comparisons	2007	Canadian Journal of Zoology	Multiple	Canada and Alaska		Multiple	Carbiou, Muskoxen, and Moose	Parasite	Protostrongylid		To report on a new protostrongyloid found in caribou, muskoxen, and moose		Arctic
145	Effects of Protostrongylus sp. and Pneumocystis sp. on the pulmonary tissue and the condition of mountain and brown hares from Finland	2006	Journal of Wildlife Diseases	Finland	southern and central Finland as far north as the game management district of Oulu		Hares	Mountain and Brown hares	Multiple	Parasite and Fungi: Protostrongylus sp. and pneumocystis sp.		To evaluate the prevalence and effect of lungworms in hares	MH 194/201 (96.5%) infected, Brown hare 18/30 (60%) infected, condition and weight of hare did not have a significant association with lungworm infection	Arctic
146	Outbreak of parasitic peritonitis in reindeer in Finland	2007	Veterinary Record	Finland	Oulu region		Reindeer		Parasite	Setaria spp.		To report on an outbreak of peritonitis in reindeer	Increase from 4.9% (2001) to 40.1%(2003), positive correlation between worm count and degree of peritonitis	Arctic
147	A lymphatic dwelling filarioid nematode, Rumenfilaria andersoni (Filarioidea; Splendidofilariinae), is an emerging parasite in Finnish cervids	2015	Parasites & Vectors	Finland	different parts of the country		Multiple	Cervids: reindeer, moose, white tailed deer, roe deer	Parasite	Rumenfilaria andersoni		To determine the abundance and prevalence of R. andersoni in Finnish cervids	Found to be a common and abundant parasite in reindeer (0-90%), also found in moose and deer	Arctic
148	Efficacy of different treatment regimes against setariosis (Setaria tundra, Nematoda: Filarioidea) and associated peritonitis in reindeer	2008	Acta Veterinaria Scandinavica	Finland	Kuusamo		Reindeer		Parasite	Setaria tundra (Setaria tundra, Nematoda: Filarioidea)		To examine the treatment efficacies of antihelminths in treating S. tundra in reindeer	Ivermectin was effective against S. tundra, maasive and routinely applied antiparasitic treatment can improve health of reindeer	Arctic
149	Climate change promotes the emergence of serious disease outbreaks of filarioid nematodes	2010	EcoHealth	Finland	Kuusamo, Sodankyla and Kevo		Multiple	Cervids: reindeer and moose	Parasite	Filarioid nematodes		To examine the potential effect of climate change on filarioid disease outbreaks	Mean summer temperatures over 14 C drive emergence of disease due to S. tundra	Arctic
150	Setaria tundra microfilariae in reindeer and other cervids in Finland	2009	Parasitology Research	Finland	Kainuu, Suomenselkä		Multiple	Cervids: reindeer, moose, roe deer	Parasite	Setaria tundra		To investigate the prevalence of S. tundra in Finnish cervids	Overal prevalence in reindeer is 42%, in moose 1.4-1.8%	Arctic
151	Occurrence of Escherichia coli O157 in reindeer (Rangifer tarandus).	2001	Veterinary Record	Finland	northern Finland		Reindeer		Bacteria	Escherichia coli O157		To examine the occurrence of E. coli O157 in Finnish reindeer	E. coli O157 was not detected	Arctic
152	Screening for chronic wasting disease in caribou in northern Quebec	2002	Cross-Canada Disease Report	Canada	Quebec	Northern Quebec	Caribou		Prion	Chronic wasting disease (CWD)		To survey caribou in northern Quebec for CWD	No positive PrPsc immunostaining in 95 samples, with herd of 260 000 suggests prevalence of 6.6%	Not	Important arctic migrating species
153	Trichinella surveillance in black bears (Ursus americanus) from the Dehcho region, northwest territories, Canada, 2002â€“15	2017	Journal of Wildlife Diseases	Canada	Northwest Territories	south-western NWT	Black bear		Parasite	Trichinella spp.		To test the prevalence of Trichinella in black bears	4.1% of bears were positive	Arctic
154	Antibodies to ruminant alpha-herpesviruses and pestiviruses in Norwegian cervids	2003	Journal of Wildlife Diseases	Norway	all regions of Norway		Multiple	Cervids: reindeer, moose, roe deer, and red deer	Virus	Virus: Alpha herpesvirus and pestivirus		To examine the seroprevalence of viral infections in cervids	Multiple pathogen prevalences reported	Arctic
155	High prevalence of hepatitis E virus in Swedish moose - A phylogenetic characterization and comparison of the virus from different regions	2015	PLoS ONE	Sweden	seven Swedish counties: theIslandof Öland, Småland, Västergötland, Södermanland, Västmanland, Värmland andVästerbotten		Moose		Virus	Hepatitis E		To examine the prevalence of HEV in moose and sequence a moose HEV genome	High frequency of HEV in moose, 67 (29%) had markers of past infection, 34 (15%) HEV RNA positive, 43 (19%) were seropositive for anti HEV-antibodies	Arctic
158	Prevalence, risk factors and control of Giardia duodenalis in sledge dog kennels in Kiruna (Sweden)	2016	Kleintierpraxis	Sweden	Kiruna		Sled dog		Parasite	Giardia duodenalis		To determine prevlance of G. duodenalis in sledge dog kennels	12/16 kennels were positivefor G. duodenalis, 8/16 werepositive for T. canis or T. leonina	Arctic
160	Public health implications of an outbreak of rabies in arctic foxes and reindeer in the Svalbard archipelago, Norway, September 2011	2011	European Communicable Disease Bulletin	Norway	Svalbard		Multiple	Arctic fox and reindeer	Virus	Rabies		To report on an outbreat of rabies in Svalbard	2 arctic foxes and 8 reindeer were diagnosed with rabies	Arctic
165	Prevalence of antibodies against Toxoplasma gondii and Neospora caninum in moose (Alces alces) and roe deer (Capreolus capreolus) in Sweden	2010	Veterinary Parasitology	Sweden	different parts of the country		Moose		Parasite	Toxoplasma gondii and Neospora caninum		To investigate seroprevlanece of T. gondii and N. caninum in moose and roe deer	Antibodies to T. gondii were detected in 85 (20%), Seroprevlance was higher in southern and central regions than in the north.All moose were negative for N. caninum	Arctic
166	The reindeer abomasal nematode (Ostertagia gruehneri) is naturally transmitted to sheep when sharing pastures	2014	Parasitology Research	Finland	Northern Finland		Multiple	Reindeer and sheep	Parasite	Ostertagia gruehneri/Ostertagia arctica, Mazamastrongylus dagestanica, Nematodirus tarandi, Nematodirella longissimespiculata, Bunostomum trigonocephalum; Teladorsagia circumcincta/Teladorsagia trifurcata, Nematodirus filicollis and Nematodirus spathiger		To investiage the possibiltiy for cross- infection of GI nematodes between reindeer and sheep sharing corrals	Several GI nematode species were found in reindeer, only one reindeer parasite type found in sheep, Ostertagia gruehneri	Arctic
167	Vector-borne pathogens in arctic foxes, Vulpes lagopus, from Canada	2015	Research in Veterinary Science	Canada	Nunavut	Karrak Lake	Arctic fox		Multiple	Anaplasma, Babesia, Bartonella, Ehrlichia, and Hemotropic Mycoplasma spp.		To investigate molecular prevalence of 5 different general of vector borne pathofens in arctic foxes	Bartonella (3) Mycoplasma haemocanis (1) Ehrlichia canis (1) and Anaplasma (!)/ 28, results suggest vector borne pathogens not typically associated with the Arctic exist even at low levels	Arctic
175	Foxes (Vulpes vulpes) as sentinels for parasitic zoonoses, Toxoplasma gondii and Trichinella nativa, in the northeastern Canadian Arctic	2018	IJP: Parasites and Wildlife	Canada	Nunavik		Red Fox		Multiple	Toxoplasma gondii and Trichinella nativa		To explore if foxes could be sentinels for parasitiv zoonoses	DNA of T .gondii and T. nativa were present in 44%/ 39 and 36%/ 39 foxes, Co-infection occurred in 23%	Arctic
176	Giardia and Cryptosporidium infections in neonatal reindeer calves: Relation to the acute phase response	2017	Comparative Immunology, Microbiology and Infectious Diseases	Finland	Lapland		Reindeer		Parasite	Giardia and Cryptosporidium		To determine if spontaneous occuring Giardia and Cryptospoidium infections impact neonatal innate immuse system	Giadia was detected in 100% of claves, and Cryptosporidium in 23% of calves	Arctic
177	No interspecific covariation in intensities of macroparasites of reindeer, Rangifer tarandus (L.)	1998	Parasitology	Norway	Northern Norway		Reindeer		Parasite	Cephenomya trompe, Hypoderma tarandi, Linguatula arctica, Elaphostrongylus rangiferi, abomasal nematodes		To investiage covaration and distribuion of macroparasites in reindeer	Table with prevalence of infection is given by parasite	Arctic
178	Anti-Brucella antibodies in moose (Alces alces gigas), muskoxen(Ovibos moschatus), and plains bison (Bison bison bison) in Alaska, USA	2016	Journal of Wildlife Diseases	United States	Alaska		Multiple	Moose, muskoxen, and plains bison	Bacteria	Brucella		To detect anti-brucella antibodies in moose, muskoxen, and plains bison	Anti-brucella antibodies detected in moose using multiple methods, presence of antibody-positive animals suggests presence of Brucellae over time	Arctic
179	A protein A/G indirect enzyme-linked immunosorbent assay for the detection of anti-Brucella antibodies in Arctic wildlife	2013	Journal of Veterinary Diagnostic Investigation	Multiple	Northeast Atlantic stock		Multiple	Polar bears, seals, whales, reindeer/ caribou	Bacteria	Brucella		To examine the iELISA assay for species independent anti-Brucella antibody detection	Results suggest protein A/G is well suited for the detection of anti-Brucella antibodies in these species with iELISA	Arctic
181	Associations between Trichinella species and host species in Finland	2002	Journal of Parasitology	Finland			Multiple	Raccoon dogs, red foxes, European lynxes, brown bears, wolves, and badgers	Parasite	Trichinella spp.		To examine the prevalence of Trichinella in species throughout Finland	Prevalence varied by geographic region, risk of infection higher in the SE and in foxes and lynx	Arctic	Samples obtained incl. from UOulu
182	Prevalence of antibodies against Toxoplasma gondii in polar bears (Ursus maritimus) from Svalbard and East Greenland	2009	Journal of Parasitology	Multiple	Norway (Svalbard), and East Greenland	x	Polar bears		Parasite	Toxoplasma gondii		To examine the prevalence of antibodies against T. gondii in polar bears	Prevalence varied by age and sex, 3.6% in cubs, 21.4% in adults	Arctic
185	First detection of Echinococcus multilocularis in Sweden, February to March 2011	2011	European Communicable Disease Bulletin	Sweden	different parts of the country		Red Fox		Parasite	Echinococcus multilocularis		To report on the first findings of E> multilocularis in Sweden	Describes first 2 cases and work to estimate spread and prevalence of infection	Arctic
187	Seroprevalence of canine influenza virus (H3N8) in Iditarod racing sled dogs	2012	Canadian Veterinary Journal	United States	Alaska	Anchorage	Sled dog		Virus	Canine influenza virus (H3N8)		To survey racing sled dogs from CIV antibodies	0/399 dogs were seropositive for CIV antibodies	Arctic
188	Antibodies to selected pathogens in free-ranging terrestrial carnivores and marine mammals in Canada	2004	Veterinary Record	Canada	Alberta, British Columbia, Nunavut, NWT, Prince Edward Island, Nova Scotia etc		Multiple	Walrus and beluga from the Arctic only, others from other southern provinces - Cougar, lynx, badger, fisher, wolverine, wolf, black bear, grizzly bear, polar bear	Multiple	Canine adenovirus [CAV-2], Feline herpesvirus [FHV], Phocine herpesvirus , canine distemper virus, dolphin morbillivirus [DMV], phocine distemper virus [PDV], parainfluenza virus type 3 [P13], rabies virus, dolphin rhabdovirus [DRV], canine coronavirus, feline coronavirus, feline leukaemia virus, Borrelia burgdorferi and Toxoplasma gondii		To survey multiple mammals for pathogens	Overall prevalence for antibodies to pathogesn by animals is reported	Arctic
190	The level of infection with gastro-intestinal nematodes in Svalbard reindeers from Hornsund area, Spitsbergen	2007	Polish Polar Research	Norway	Svalbard	Spitsbergen	Reindeer		Parasite	Ostertagia gruehneri, Marshallagia marshalli		To evaluate infection level of GI nematodes in reindeer	Ostertagia grunhneri (97.6%) and Marshallagia marshalli (2.3%) were identified	Arctic
192	Serosurvey for Toxoplasma gondii in arctic foxes and possible sources of infection in the high Arctic of Svalbard	2007	Veterinary Parasitology	Norway	Svalbard		Multiple	Arctic fox, reindeer, sibling voles, walruses, barnacle geese, kittiwakes, glaucous gulls	Parasite	Toxoplasma gondii		To examine prevlanece of T. gondii in animals in Svalbard	43% of arctic foxes were seropositive (n= 594), no reindeer seropositive (n=390)	Arctic
193	First isolate of Toxoplasma gondii from arctic fox (Vulpes lagopus) from Svalbard	2008	Veterinary Parasitology	Norway	Svalbard		Arctic Fox		Parasite	Toxoplasma gondii		To identify potential source of T. gondii in Svalbard	1/11 fox found to be seropositive, able to infect mice and cats	Arctic
199	Development of a multiplex PCR for identification of Dictyocaulus lungworms in domestic and wild ruminants	2015	Parasitology Research	Multiple	northern Norway, Alaska, Sweden and north-eastern part of Poland		Multiple	European bison, cattle, moose, red deer, reo deer	Parasite	Dictyocaulus spp.		To develop a simple molecular test to detect lungworm DNA fron both adult and larval lungworms and to distinguish between D. spp.	Multiplex method provided consistent results for samples from both Sweden and Poland, overcoming traditional limitations based on morphologic feature differences	Arctic
200	Serosurvey of selected zoonotic agents in polar bears (Ursus maritimus)	2005	Veterinary Record	Multiple	Canada, Alaska, Russia	Chukchi and Beaufort Seas	Polar bears		Multiple	Bacteria, parasite: Brucella, Toxoplasma gondii, and Trichinella		To determine seroprevalence of zoonotic agents in polar bears	Overall seroprevalence for Brucella spp. 5%, Antibody prevalence of T. gondii 6% and prevalence of Trichinella increased with age	Arctic
203	Parasite intensity and fur coloration in reindeer calves - Contrasting artificial and natural selection	2009	Journal of Animal Ecology	Norway	Northern Norway		Reindeer		Parasite	Hypoderma tarandi		To determine if parasite intensity and fur color were correlated	High density of parasites in lighter color calves, associated with decrease in body mass	Arctic
206	Infectious keratoconjunctivitis in semi-domesticated Eurasian tundra reindeer (Rangifer tarandus tarandus): microbiological study of clinically affected and unaffected animals with special reference to cervid herpesvirus 2	2018	BMC Veterinary Research	Multiple	Fenoscandia: Finland, Sweden, Norway	different parts of the countries	Reindeer		Virus	Cervid herpesvirus 2		To investiage the presence and prevalence of potential pathogens for IKC in reindeer	Seroprevlaence was 37.4% for alphaherpes (95/254), 3.8% (for gammaherpes (8/211), and 7.1% for pestivirus (15/211). Other potential pathogens reported	Arctic
208	Echinococcus multilocularis and Echinococcus canadensis in wolves from western Canada	2014	Parasitology	Canada	Northwest Territories, Manitoba, and Saskatchewan		Wolves		Parasite	Echinococcus multilocularis, E. canadensis		To investigate prevalence, intensity, and genetic diversity of Echinococcus tapeworks in wolves	Echinococcus tapeworms found in 42% of 93 wolves	Arctic
210	Rabies of wild mammals in Russia at the turn of the 20th and 21st centuries	2007	Zoologicheskii Zhurnal	Russia	different parts of the country		Multiple	Wild canids	Virus	Rabies		To analyse rabies data from 1960-2006	Dominate role of red foxes in spreading rabies among wildlife is established, number of rabid animals reported	Arctic
211	Molecular characterization of Cryptosporidium sp. isolated from northern Alaskan caribou (Rangifer tarandus)	2002	Journal of Parasitology	United States	Alaska	Northern Alaska	Caribou		Parasite	Cryptosporidium spp.		To characterize cryptosporidium spp. found in caribou	Cryptosporidium spp. found in 3/49 caribou, Giardia not detected in caribou or moose sampled. NO cryptosporidium found in moose either	Arctic
213	Parasites of the arctic fox (Alopex lagopus) in Iceland	1993	Journal of Wildlife Diseases	Iceland			Arctic fox		Parasite	Eimeria sp.; Trematoda: Cryptocot yle lingua, Plagiorchis elegans, Brachylaemus sp., Trlstriata sp., and Spelotrema sp.; Cestoda: Mesocestoides canislagopodis, Schlstocephalus solidus, and Diphyllobothrium dendriticum; Nematoda: Toxascaris leonina, Toxocara canis, Uncinaria stenocephala, Capillaria aerophila; Acanthocephala: Polymorphus meyeri and Corynosoma hadweni.		To investiage parasites in arctic foxes in Iceland	44/50 arctic foxes harbored 15 species, prevalence by species is given, 11 appear new records in Iceland and 6 appear to be new host records	Arctic
214	Trichinella nativa in Iceland: An example of Trichinella dispersion in a frigid zone	2010	Journal of Helminthology	Iceland			Polar bear		Parasite	Trichinella spp.		To report on 2 polar bears with Trichinella that arrived on Iceland coast	2nd report of Trichinella infection in polar bears that reached Iceland	Arctic
215	Identification and Characterization of Two Novel Viruses in Ocular Infections in Reindeer	2013	PLoS ONE	Norway	Troms, Finnmark etc		Reindeer		Virus	Papillomavirus and Betaherpesvirus		To report on 2 novel viruses isolated for reindeer infected with IKC	Novel papillomavirus in 2/8 eye swabs, novel betaherpesvirus in 3/8 eye swabs	Arctic
216	Prevalence of antibodies against Brucella spp. in West Greenland polar bears (Ursus maritimus) and East Greenland muskoxen (Ovibos moschatus)	2018	Polar Biology	Greenland	West Greenland	Baffin Bay	Polar bear	Muskoxen	Bacteria	Brucella		To examine the serological prevalence of Brucella spp. in polar bears	6/96 (6.25%) of polar bears were seropositive for Brucella	Arctic
217	Acute toxoplasmosis in three wild arctic foxes (Alopex lagopus) from Svalbard; one with co-infections of Salmonella Enteritidis PT1 and Yersinia pseudotuberculosis serotype 2b	2005	Research in Veterinary Science	Norway	Svalbard		Arctic Fox		Multiple	Bacteria, parasite: Toxoplasma, Salmonella, Yersinia		To describe 3 cases of acute toxoplasmosis in Arctic foxes and subsequent co-infections	Co-infections and negative tests are included	Arctic
218	Efficacy of ivermectin against nematodes infecting field populations of snowshoe hares (Lepus americanus) in Yukon, Canada	1996	Journal of Wildlife Diseases	Canada	Yukon	Kluane Lake	Snowshoe hare		Parasite	Nematodes		To investigate the effect of Ivermectin against nematodes in Snowshoe hares	Ivermectin was 80% effective for Protostrongylus boughtoni and Nematodirus triangularis, but had no effect on numbers of Trichuris leporis or Passalurus sp.	Arctic
219	Blood chemistry and endoparasites of the mountain hare (Lepus timidus L.) in high and low density populations.	1992	Journal of Wildlife Diseases	Finland	West Coast of Central Finland, Oulu airport and Kalajoki		Mountain hare		Parasite	Protostrongylus pulmonalis and Trichostrongylus retortaeformis		To investigate the effecrt of population density on parasitic loads in mountain hares	Dense population and lack of suitable food resulted in poorer body condition and more parasites	Arctic
220	Intestinal parasites of the Arctic fox in relation to the abundance and distribution of intermediate hosts	2009	Parasitology	Norway	Svalbard		Arctic Fox		Parasite	Echinococcus multilocularis, Taenia crassicpes, Taenia polyacantha, Taenia krabbei, and Diphyllobothrium spp.		To assess the abundance of intestinal parasites in Arctic foxes in relation to distribution of intermediate hosts	Distribution and abundance of intermediate host affect the GA parasite community in Arctic fox	Arctic
221	Neospora caninum and Toxoplasma gondii antibody prevalence in alaska wildlife	2010	Journal of Wildlife Diseases	United States	Alaska		Multiple	Caribou, wilf, moose, fox, deer, coyote	Parasite	Neospora caninum and Toxoplasma gondii		To assess the the antibody prevalence of N. canidnun and T. gondii in Alaskan wildlife	Seroprevalence given by species and parasite	Arctic
222	Morbillivirus-associated lipid pneumonia in Arctic foxes	2018	Journal of Veterinary Diagnostic Investigation	United States	Alaska		Arctic Fox		Virus	Morbillivirus		To report on cases of lipid pneumonia in Arctic foxes	Canine distemper virus associated with 5 cases/ 24	Arctic
223	Herpesvirus infection in woodland caribou in Alberta, Canada	2005	Journal of Wildlife Diseases	Canada	northern Alberta		Caribou		Virus	Herpesvirus		To investiage evidence for herpesvirus or pestivirus in caribou	No antibodies against bovine viral diarrhea virus dietected, 63/121 (52%) had titers for bovine herpes virus 1, 20 had antibodies for elk alphaherpesvirus	Not	Species of the Arctic
224	Serological evidence of tick-borne encephalitis virus infection in moose and deer in Finland: Sentinels for virus circulation	2016	Parasites & Vectors	Finland	different parts of the country		Moose	White-tailed deer, roe deer	Virus	Tick-borne encephalitis virus (TBEV)		To explore the incidence of TBEV in wild cervids	9/1213 (0.74%) moose were seropositive to TBEV	Arctic
225	A screening for canine distemper virus, canine adenovirus and carnivore protoparvoviruses in Arctic foxes (Vulpes lagopus) and red foxes (Vulpes vulpes) from Arctic and sub-Arctic regions of Norway	2018	Polar Research	Norway	Svalbard, Northern Norway (Finnmark County)		Foxes	Arctic and red fox	Virus	Canine distemper virus, CAV, and Carnivore protoparovirus		To determien seroprevalence of canine viruses in fox populations	CDV decreased from 25% to 6%, CAdV increased from 25-40% tp 68% in arctic foxes, CAdV varied in red fox from 31%-67%, but increased to 80%, Carnivore protoparvovirus was not detected	Arctic
226	Cervid herpesvirus 2, the primary agent in an outbreak of infectious keratoconjunctivitis in semidomesticated reindeer	2009	Journal of Clinical Microbiology	Norway	Troms County		Reindeer		Virus	Cervid herpesvirus 2		To investigate the correlation betweeen CvHV-2 and IKC in reiondeer	Seroprevalence was 86% in IKC animals and 42% in non-IKC animals	Arctic
227	Parapoxvirus infection in Norwegian semi-domesticated reindeer (Rangifer tarandus tarandus)	2001	Veterinary Record	Norway	Troms County		Reindeer		Virus	Parapoxvirus		To report on parapox virus infections in reindeer	Outbreaks reported	Arctic
228	Serologic survey for selected virus infections in polar bears at Svalbard	2005	Journal of Wildlife Diseases	Norway	Svalbard		Polar bear		Multiple	Canine distemper virus, Calicivirus, Phocid-herpesvirus type 1, Rabies		To report on seroprevalence of select viruses in polar bears	Seroprevlaence of 8% to CDV, 2% to calicivirus found, no antibodies for PhHV-1 or rabies	Arctic
229	Serologic survey for antibodies against Mycobacterium avium subsp. paratuberculosis in free-ranging cervids from Norway	2004	Journal of Wildlife Diseases	Norway	different parts of the countries		Multiple	Moose, reindeer, red deer, roe deer	Bacteria	Mycobacterium avium subspecies paratuberculosis		To conduct a serologic survey of antibodies to M. avium subsp. Paratuberculosis	Seropositive moose (10/537, 1.9%), reinder (11/325, 3.4%)	Arctic
230	Antibodies against orthopoxviruses in wild carnivores from Fennoscandia	1998	Journal of Wildlife Diseases	Multiple	Fennoscandia: Finland, Norway, Sweden	different parts of the countries	Multiple	Red fox, lynx, brown bear, wolverine	Virus	Orthopoxviruses		To examine the presence of anti-orthopoxviruses in wild carnivores	High prevalences found for red fox in Norway (7/62,11%) and Finland (7/14, 50%), brown bear in Sweden (1/45, 2%)	Arctic
231	Geographic distribution and molecular diversity of bartonella spp. infections in moose (alces alces) in Finland	2016	Journal of Wildlife Diseases	Finland	different parts of the country		Moose		Bacteria	Bartonella		To examine the prevalence and diversity of Bartonella in Finnish moose	Overall prevalence of bartonella infection was 72.9 (108/148), prevalence was highest in the south (90.6%)	Arctic
235	Survey of Campylobacter species, VTEC 0157 and Salmonella species in Swedish wildlife	2003	Veterinary Record	Sweden	different parts of the country		Multiple	Canada geese, roe deer, hares, moose, wild boars, and gulls	Bacteria	Campylobacter spp., Escherichia coli O157, and Salmonella spp.		To screen for pathogenic bacteria in Swedish wildlife	E. coli O157 was only isolated from 1 boar, salmonella were only isolated from 4% of gulls, and Campylobacter spp. commonly isolated from all species except deer	Arctic
238	Prevalence of antibodies for selected canine pathogens among wolves from the Alaska peninsula, USA	2016	Journal of Wildlife Diseases	United States	Alaska	Alaska Peninsula	Wolves		Multiple	Canine adenovirus (CAV), canine coronavirus (CCV), canine distemper virus (CDV), canine herpesvirus (CHV), canine parainfluenza (CPI), canine parvovirus (CPV), Neospora caninum, and Toxoplasma gondii		To report the prevalence of antibodies for select pathogens in wolves	Many prevalences to multiple pathogens given	Arctic
239	Hepatitis E virus seroprevalence in free-ranging deer in Canada	2017	Transboundary and Emerging Diseases	Canada	Lake Erie region of Ontario, Lunenburg county in Nova Scotia, town of Nipawin, Saskatchewan, Nunavut and the Northwest Territories		Caribou, deer	White-tailed deer, mule deer	Virus	Hepatitis E		To examine the seroprevalence of HEV in deer in Canada	3.2% of caribous were seropositive	Arctic
240	Serologic survey for Toxoplasma gondii in grizzly bears from Alaska	1997	Journal of Wildlife Diseases	United States	Alaska		Grizzly bears		Parasite	Toxoplasma gondii		To investigate exposure to T. gondii in Grizzly bears	Anibody prevlaence ranged from 9-37% (southern to northern regions)	Arctic
241	Serologic survey for canine coronavirus in wolves from Alaska	2001	Journal of Wildlife Diseases	United States	Alaska		Wolves		Virus	Canine Coronavirus		To investigate expsorue to Canine Coronavirus in wolves	Serum antibody prevalence ranged for 25-70%, depending on collection time	Arctic
242	Serum antibody prevalence of malignant catarrhal fever viruses in seven wildlife species from Alaska	2002	Journal of Wildlife Diseases	United States	Alaska		Multiple	Muskox, Dall sheep, elk, bison, deer, caribou, moose	Virus	Malignant catarrhal fever virus		To investigate the antibody prevlaence to MCFV in wildlife	Caribou 9/232 (4%), moose 3/219 (1%)	Arctic
243	Serologic survey for Actinobacillus capsulatus in free-ranging snowshoe hares (Lepus americanus) from Alaska and Alberta.	1990	Journal of Wildlife Diseases	Multiple	United States and Canada	Alaska and Alberta	Snowshoe hare		Bacteria	Actinobacillus capsulatus		To test for antibodies against A. capsulatus in snowshoe hares	98/239 (41%) positive in Alaska and 51/111 (46%) positive in Alberta	Arctic
244	Serologic survey for selected disease agents in wolves (Canis lupus) from Alaska and the Yukon Territory, 1984-2000	2004	Journal of Wildlife Diseases	Multiple	United States and Canada	Alaska and Yukon Territory	Wolves		Multiple	Canine hepatitis virus (ICH), canine distemper virus (CDV), canine parvovirus (CPV), Francisella tularensis, and Leptospira interrogans		To survey anitobodies against various disease agesnts in wolves	Prevlaences to multiple disease agents by locations provided	Arctic
245	Trichinella sp. in wolves from interior Alaska	1999	Journal of Wildlife Diseases	United States	Alaska	Interior Alaska	Wolves		Parasite	Trichinella spp.		To explore prevlanece of Trichinella in wolves and compare prevalences by age and sex	54/148 (36%) of samples tested positive, no significant relationship between age or sex of host	Arctic
246	Characteristics of Shiga toxin-producing Escherichia coli O157 in slaughtered reindeer from Northern Finland	2017	Journal of Food Protection	Finland	Northern Finland		Reindeer		Bacteria	Escherichia coli O157		To test for pathogenic shiga-toxin producing E. coli O157 in slaughtered reindeer	Shiga toxin genes found in >30% of samples, and serogroup O157 was found in 20% of the stx positive saples, reindeer may be a resevoir for STEC O157:H7/H-	Arctic
247	Survey for Encephalitozoon cuniculi in arctic foxes (Alopex lagopus) in Greenland	2003	Journal of Wildlife Diseases	Greenland			Arctic fox		Parasite	Encephalitozoon cuniculi		To test for antibodies against E. cuniculi in arctic foxes	0/230 were seropositive, contrasting with observations from other Arctic areas	Arctic
248	Infestation by Hypoderma tarandi in reindeer calves from northern Finland-Prevalence and risk factors	2014	Veterinary Parasitology	Finland	Northern Finland		Reindeer		Parasite	Hypoderma tarandi		To determine prevalence to H. tarandi in reindeer calves	ELISA showed seroprevlaence in 60.9% where prevalence increases in latitude	Arctic
249	A serosurvey for Trichinella in Arctic foxes (Vulpes lagopus) in Svalbard	2014	Polar Biology	Norway	Svalbard		Arctic fox		Parasite	Trichinella spp.		To assess the infection rate of trichinella spp in arctic foxes	Antibody assay demonstrated a seroprevalence of 11.7%, prevalence increased with age, body condition was similar in both seropositive and seronegatives.	Arctic

## Sheet: Mammals_Rus
Article ID	Title	Year of Publication	Journal	Country	Region/ Province	City/ Town	Animal(s)	Multiple animals:	Infectious Agent Group (i.e. Bacteria, parasite, virus)	Infection(s)	Objective of article	Main results	Notes
1200	Epizootological monitoring of anthrax in Olyokminsky district of the republic of Sakha (Yakutia)	2017	Вестник Бурятской Государственной Сельскохозяйственной Академии Им. В.р. Филиппова	Russia	Yakutia, Olyokminsky district		Multiple	Domestic animals: cattle, horses, deer	Bacteria	Anthrax	This article presents a brief description of Olyokminsky District, analyses and provides a synthesis of the epizootological data on anthrax in domestic animals in the district. The dates and the number of epizootic outbreaks in the settlements as well as the number of dead animals are revised and corrected. The largest anthrax epizootic outbreaks in domesticated animals were recorded in 1887 and …
1201	Epizootological monitoring of anthrax in the Vilyui zone of the republic of Sakha (Yakutia) and its epidemiological significance	2017	Наука И Образование	Russia	Yakutia, Verkhnevilyuisky district		Multiple	Domestic animals: cattle, horses, deer	Bacteria	Anthrax	This article presents a brief description of Verkhnevilyuisky district, the date of formation, the number of settlements, and analyzed and summarized data of epizootologic anthrax in domestic animals in the district area, the date was specified, the number of epizootic anthrax in human settlements and the number of dead animals. The largest epizootic anthrax in animals was detected in 1914 in thi…
1202	The epizootic characteristics of the Siberian plague from 1811 to 1993 in the republic of Sakha (Yakutia)	2012	Актуальные Вопросы Ветеринарной Биологии	Russia	Yakutia		Multiple	Domestic animals: cattle, horses, deer	Bacteria	Anthrax	The epizootic situation on the Siberian plague in the Republic of Sakha (Yakutia) from 1811 to 1993 is analyzed in this paper. At the same time the number of dead animals by species (cattle, horses, deer) and the number of adverse settlements are determined, the dynamics of Siberian plague epizooties by year is composed and also the prevalence and frequency of epizooties at the district level are…
1203	Ecological and socio-economic aspects of reindeer epizootics in Yamal (on the example of anthrax)	2017	Научный Вестник Ямало-Ненецкого Автономного Округа	Russia	Yamal Peninsula		Reindeer		Bacteria	Anthrax	The ecosystem role of epizootics is examined using the example of anthrax among reindeer on the Yamal Peninsula. It is shown that epizootics are a homeostatic mechanism pointed at curbing excessive growth in the number of animals and maintaining the integrity of the system. The ecological situation on the Yamal Peninsula, related to reindeer herding as a traditional form of nature management of t…
1206	Anthrax does not forgive mistakes: the information assessment following the Yamal peninsula outbreak in the summer of 2016	2016	Журнал Инфектологии	Russia	Russian regions/Yamal peninsula		Multiple		Bacteria	Anthrax	For the first time in a long time period the sources of actual information about anthrax in Russia and in the world are systematized. The essence of the problem, features of epidemiology and clinical manifestations of the current forms of anthrax disease are analyzed. The upgraded classification of anthrax is presented, the clinical manifestations of oro-oropharyngeal varieties of intestinal form…
1207	Anthrax in Yamal: An ecological view on traditional reindeer husbandry	2017	Экология	Russia	Yamal peninsula		Reindeer		Bacteria	Anthrax	No English abstract
1208	Anthrax in the Asian part of the Russian federation. Communication 2. Up-to-date epizootiological and epidemiological situation in Siberia and at the Far East (1985–2016)	2017	Проблемы Особо Опасных Инфекций	Russia	Siberia and the Far East		Multiple	Domestic animals	Bacteria	Anthrax	7201 stationary hazardous as regards anthrax points (SHAP) and 557 anthrax burial places are registered in Siberia and the Far East. Epizootiological and epidemiological situation for anthrax in the Asian part of the Russian Federation is characterized at present by uneven geographical distribution and redominance of old non-manifested shaps (98.9 %), and epizootic outbreaks with epidemic complic…
1209	Anthrax in the Asian part of the Russian Federation. Communication 1. Historical remarks on the spread of the disease in Siberia and Far East	2017	Проблемы Особо Опасных Инфекций	Russia	Siberia and the Far East		Multiple		Bacteria	Anthrax	The paper presents the data describing historical aspects of anthrax dissemination in Siberia and Far East. This disease has engrained here and spread throughout the entire Asian part of Russia. The majority of the soil anthrax foci are concentrated in the southern entities of the country. Siberia and Far East regions are characterized by low anthrax incidence rates among the population. This is …
1210	Anthrax	2016	Проблемы Экологического Мониторинга И Моделирования Экосистем	Russia	Yamal Peninsula		Reindeer		Bacteria	Anthrax	The article gives a brief description of anthrax as a nosological unit as well as an analysis of the status and causes of outbreaks of this disease on the Yamal Peninsula (the village of Yar-sale, Yamal district) in July-August 2016. The outbreak occurred against a background of large-scale epidemic among the reindeer, with the result that died 2 572 heads of deer, ill 24 people, one of them died…
1211	Thoughts about the future of reindeer herding in Yamal after anthrax outbreak in 2016	2017	Научный Вестник Ямало-Ненецкого Автономного Округа	Russia	Yamal Peninsula		Reindeer		Bacteria	Anthrax	In this article we argue for the incorporation of tundra people's knowledge into larger scale research projects about environmental change in the Russian Arctic. This knowledge has grown out of everyday practice of humans in their particular environment, and their long learning in this environment passed on by their ancestors. It is important that alongside western science such practitioners' kno…
1212	Development of scientific veterinary provision of reindeer herding of Yakutia	2017	Известия Самарского Научного Центра Российской Академии Наук	Russia	Yakutia		Reindeer		Bacteria	Bacteria: Anthrax, brucella	Northern reindeer herding is a traditional, ethno-forming branch of animal husbandry in Yakutia. The obstacle to the sharp increase in productivity of northern reindeer breeding was and remains the problem of scientiﬁ c provision. In this regard, July 12, 1908 in Yakutsk, the Veterinary-Bacteriological Laboratory of the Yakutsk region was established, which was engaged in the diagnosis of infecti…
1213	Organization of anti-epidemic measures during the anthrax outbreak in the Yamalo-Nenets autonomous district in 2016	2017	Проблемы Особо Опасных Инфекций	Russia	Yamalo-Nenets autonomous district		Reindeer		Bacteria	Anthrax	The organizational peculiarities of anti-epidemic measures during the anthrax outbreak in the Yamalo-Nenets Autonomous District in 2016 are presented. Complex of these measures provided for anthrax patients active identification and hospitalization, preventive immunization and emergency antibiotic prophylaxis of risk groups, vaccination of reindeer, utilization of fallen animals. Disinfection, de…
1214	Organization of laboratory research of clinical and environmental samples during the anthrax outbreak in the Yamalo-Nenets autonomous district in 2016	2017	Проблемы Особо Опасных Инфекций	Russia	Yamalo-Nenets autonomous district		Reindeer		Bacteria	Anthrax	Presented are the order and features of organization of operative diagnostic and monitoring studies of the material during the anthrax outbreak in the Yamalo-Nenets Autonomous District in 2016. Characterized are the main directions of the laboratory base work. Represented are the results of laboratory studies of various materials (clinical samples, material from animals, samples of environmental …
1215	Treatment and prophylactic effectiveness of composition Ganamectin and vaccines of st.55 against Oedemagenosis and anthrax of reindeers	2014	Пермский Аграрный Вестник	Russia	North of Russia		Reindeer		Multiple	Bacteria, parasite: Anthrax, edemagenosis, necrobacillosis and helminthiasis	The purpose of the work is improvement of carrying out mass antiepizootic actions in northern reindeer breeding on the basis of a complete set of new treatment-and-prophylactic preparations. One of the factors which are negatively influencing safe development of reindeer breeding is emergence and distribution of diseases in deer of various character, as over 50% of all unproductive losses are not…		Vaccination study in-vitro and in-vivo
1217	Epizootological study of anthrax in the group of Vilyuisk districts in the republic of Sakha (Yakutia)	2015	Вестник Бурятской Государственной Сельскохозяйственной Академии Им. В.р. Филиппова	Russia	Yakutia	Vilyuisk districts	Reindeer		Bacteria	Anthrax	This article presents the epizootic situation on anthrax in the group of Vilyuisk districts in the Republic of Sakha (Yakutia) from 1861 to 1993. The settlements where the epizootic outbreaks of anthrax were most often recorded are defined, and the number of dead animals was determined in these districts.
1218	Outbreak of anthrax in the Yamalo-Nenets Autonomous District in 2016, Epidemiological peculiarities	2016	Проблемы Особо Опасных Инфекций	Russia	Yamalo-Nenets autonomous district		Reindeer		Bacteria	Anthrax	In 2016, in the territory of Yamalo-Nenets Autonomous District an outbreak of anthrax took place, 2650 reindeers were infected. As a consequence of contacts with affected and fallen animals, 36 cases of human infection occurred, of which one was fatal. Performed full-extent complex of anti-epidemic, anti-epizootic, and preventive measures, prompt organization of operations at the regional level a…
1219	Anthrax outbreak in Yamal-Nenets autonomous district in 2016: Response by RF Ministry of Emergencies and Defense, interaction with other agencies. Lessons learned	2017	Технологии Гражданской Безопасности	Russia	Yamalo-Nenets autonomous district		Reindeer		Bacteria	Anthrax	The article describes the key response activities by the EMERCOM of Russia rescue teams during the anthrax outbreak among domestic reindeer in the Yamal-Nenets Autonomous District in July-August 2016. The authors describe the collaboration between EMERCOM of Russia forces and the structures of the Russian Defense Ministry, other agencies and organizations.
1220	Veterinary problems of reindeer husbandry in the European north of Russia	2016	Российский Паразитологический Журнал	Russia	European north of Russia		Reindeer		Multiple	Bacteria, parasite: Anthrax, edemagenosis, cephenomiosis, necrobacillosis, echinococcosis, cysticercosis, leptospirosis, number of helminthoses, strongylatosis, monieziasis	Objective of research. As deer are kept year-round on pasture (in summer in tundra in the northern coast of the Russian arctic; in winter - in forest-tundra and northern taiga), biogeocenosis and natural focality of most parasitic and infectious diseases were formed over the years. That should be considered when developing methods for combating them, and to determine the optimal timing of mass tr…
1221	Rational model of epizootic process control in topical disease in populations of domestic northern reindeers in the Far North	2011	Вопросы Нормативно-Правового Регулирования В Ветеринарии	Russia	Far North		Reindeer		Bacteria	Bacteria: Brucella, anthrax, necrobacterios	Based on the results of a retrospective analysis of epizootic situation and our own research, taking into account modern theoretical concepts of epidemiology and epizootiology, the rational model of control of epizootic diseases, biological processes of especially dangerous infectious and parasitic diseases in a population-tions domesticated reindeer of the Far North. Found that when necrobacteri…
1222	Epizootological monitoring of main animal diseases in the Far North	2011	Известия Санкт-Петербургского Государственного Аграрного Университета	Russia	Far North		Wild and domestic animals		Multiple	Virus, bacteria, parasite: Anthrax, pseudorabies, brucella, necrobacteriosis, edemagenoz, echinococcus granulosus, alveococcus multilocularis, difillobotriosis, trichinella spiralis, toxoscaris leonina, Oedemagena tarandi, Cephenemya trompe. Leptospira, toxoplasma
1223	Cyclicity of exacerbations of the epizootic process in foci of reindeer brucellosis	2015	Современные Тенденции Развития Науки И Технологий	Russia	Yamalo-Nenets autonomous district		Reindeer		Bacteria	Brucella	No English abstract
1224	Phenotypic and biological properties of Brucella isolated from velvet antlers of reindeer	2015	Достижения Науки И Техники Апк	Russia	Yamalo-Nenets autonomous district		Reindeer		Bacteria	Brucella	The brucellosis of reindeer has specifics associated with numerous factors. The manifestation of epizooty is affected by the existence of natural foci with the source of infection in wild reindeer herds, constant migration of populations, density of reindeer herd, crossing of routes and mixing of herds, the specifics of the industry, the immune status of animals. The properties of brucella, circu…
1225	Current epizootic situation on necrobacteriosis of reindeers in Taimyr	2011	Сибирский Вестник Сельскохозяйственной Науки	Russia	Taimyr		Reindeer		Bacteria	Necrobacterios	A current epizootic situation on necrobacteriosis of reindeers in Taimyr is presented. It has been established that this disease is continually recorded at all the reindeer herds of the region. The number of sick and fallen reindeers to a considerable extent depends on the age and sex structure of a herd, etiological, veterinary-preventive and organizational-economic factors. In some years, the i…		duplicaste to 1242
1226	System of antybrucellosis actions in reindeer herding in the Russian North	2011	Достижения Науки И Техники Апк	Russia	North		Reindeer		Bacteria	Brucella	Using serology diagnostics for adult reindeer (5 - 15% of a herd) is necessary for the control of brucellosis epizootic situation in the Russian North. Complex of the organizational-economic and the special veterinary actions with certain schemes of the vaccination are using in the improvement farms from a brucellosis.
1227	Results of biological properties study of brucella culture from the "deer" strain	2017	Вестник Апк Ставрополья	Russia	Northern regions		Reindeer		Bacteria	Brucella	The article presents the results of studying the virulent and bacteriological properties of the brucella culture isolated from reindeer. It was established that isolated brucella cultures possess virulent properties for guinea pigs and cause a generalized infection. While testing the virulent properties of the «deer» strain 010 on cattle, sheep and pigs, it was established that the «deer» strain …
1228	The reservoir role of small mammals in mixed natural foci of bacterial infections in Western Siberia	2010	Зоологический Журнал	Russia	Western Siberia		small mammals	rodents	Bacteria	Borrelia burgdorferi	Based on the analysis of possible infection with spirochetes, the reservoir potential of the main species of borrelia hosts was assessed in foci of tick borrelioses in the forest steppe zone (Omsk region). Forest voles (Clethrionomys spp.) and shrews (Sorex spp.) play a noticeable part in this respect. A probable average infec tion of rodents with borrelia is 48.8 ± 7.4%. DNA of B. afzelii was fo…
1229	Reactogenic properties of weak agglutinogenic vaccine “SAV” in the organism of reindeer	2014	Аграрный Вестник Урала	Russia	Yakutia		Reindeer		Bacteria	Brucella	Investigations were carried out in unfavorable brucellosis herd nomadic tribal community “Tevr” in Nizhnekolymsky region of the Republic of Sakha (Yakutia) and the laboratory of reindeer infectious diseases SSI Yakut Scientific Research Institute of Agriculture. The aim of research is to study the properties weak agglutinogenic reactogenic vaccine SAV body reindeer. When conducting pilot experien…
1232	Features of infection in the recent locus of reindeer brucellosis	2015	Достижения Науки И Техники Апк	Russia	Yamalo-Nenets autonomous district		Reindeer		Bacteria	Brucella	The investigations were carried out to study the features of presentation of brucellosis in reindeer during bringing of the agent in well-being herds. The work was done directly under conditions of tundra during the expedition trips in reindeer crews of MRBE «Yarsalinskoe» in Yamal district of Yamalo-Nenets Autonomous District and in the laboratory of ecology of AllRussian Research Institute of B…
1233	The evaluation of the epizootic situation in the populations of wild reindeer of the Arctic zone of the Russian Federation (Literature Review)	2015	Актуальные Вопросы Ветеринарной Биологии	Russia	Arctic zone of Russia		Reindeer (wild)		Multiple	Virus, bacteria, parasite: Anthrax, brucella, rabies, toxoplasma, herpesvirus, BVDV, helmints	The paper presents the results of the assessment of the epizootic situation in the populations of wild reindeer of the arctic zone of the russian federation. it is noted that mass mortality of wild animals associated with various infectious or parasitic diseases in the region has not been reported for a long period of time. however, infectious and parasitic diseases are continuously recorded amon…
1235	About epizootic situation on rabies the reindeer herding Nenets autonomous area	2016	Вестник Государственного Аграрного Университета Северного Зауралья	Russia	Nenets autonomous area		Reindeer		Virus	Rabies	It analyzed the deteriorating situation on rabies epizootic in reindeer herding Nenets Autonomous District. It was found that the source of infection are the stray dogs and, especially, wild carnivores. Cases of other wildlife species (wolf and wolverine) are registered mostly in the winterspring period (February-March) during active migration and mating animals. At this time, most often caused f…
1236	Using predictive modeling to study epizootic process zoonotic infections by the example of the Taimyr Peninsula	2016	Генетика И Разведение Животных	Russia	Taimyr Peninsula		Multiple		Multiple	Virus, bacteria: Anthrax, influenza A	Developed predictive models based on epidemiological analysis and the theory of fuzzy sets, assess the risks of the territory of the Taimyr Peninsula epizootic anthrax and influenza A predictive calculation results showed that at all favorable for the development of epizootic process, conditions in the territory of the risk of anthrax is 81.25%. The forecast outbreaks of influenza in the populati…
1237	The invasion of the northern deer Edemagenoz in the Yamalo-Nenets autonomous area	2016	Современные Проблемы Науки И Образования	Russia	Yamalo-Nenets autonomous district		Reindeer		Parasite	Edemagenoz	As a result of the conducted long-term researches in the territory of the Yamalo-Nenets Autonomous Area the high invazirovannost of reindeers edemagenozy was revealed. The maximal indexes of extensiveness of an invasion – 36,9% and intensity of an invasion – 110,7±0,5 larvae of O. tarandi are marked out in the Yamal area. The Invazirovannost of reindeers larvae of a hypodermic gadfly depends on b…
1239	Veterinary and zootechnical problems of reproduction in the northern reindeer and their solutions	2013	Достижения Науки И Техники Апк	Russia	Taimyr Peninsula		Reindeer		Bacteria	Bacteria: Brucella, necrobacterios	Based on an analysis of published data and our own research to consider the basic zootechnical veterinary reproduction problems in reindeer herds to be brought to the focus, and the ways to solve them. Among the problems of zootechnical direction focuses on artificial insemination, genetic monitoring and management of nursing. Among the problems shown to reduce the average yield of the business o…
1240	Veterinary service of the epizootic well-being of the hunting areas in Yakutia	2018	Евразийское Научное Объединение	Russia	Yakutia		Multiple		Multiple	Virus, bacteria, parasite: Francisella tularensis, anthrax, rabies, salmonellesis, brucella, avian influenza etc	The article presents the materials about the problems and prospects of provision of freedom of hunting resources of the Republic of (Sakha) Yakutia. The main infectious diseases of wild animals. Implementation of the measures provided for in the instructions, rules and recommendations ANEESH will ensure the well being on infectious diseases for sustainable development of hunting resources.
1243	Efficiency of immunoenzyme reactions with use antigens from larva European strain Trichinella spiralis and Arctic strain T. nativа at serological monitoring in the centers of trichinellosis in Northern territories of the Russian Federation	2012	Российский Паразитологический Журнал	Russia	Chukotka		Multiple		Parasite	Trichinella Nativa	Comparative tests of diagnostic efficiency in IER excretory-secretory antigens of Trichinella spiralis and T. nativа with blood serum of mice experimentally in-fected by Trichinella spp., allocated of muscles of wild carnivores are carried out. It is shown that at use of antigen from larva T. nativa in IER for the analysis of level of specific antibodies at animals infected by Trichinella spp., c…
1244	Epizootics of trichinosis in Lorino of the Chukot Autonomous District	2008	Сибирский Вестник Сельскохозяйственной Науки	Russia	Chukotka autonomous district		Multiple		Parasite	Trichinella	The epizootics of trichinosis were studied. The trichinella prevalence rate in hosts was established. The focus of the invasion was determined as a natural and synanthropic one.
1245	Formation and functioning of natural nidus of trichinellosis	2007	Российский Паразитологический Журнал	Russia	North Russia		Multiple		Parasite	Trichinella	The basic ways and factors of trans-fer of Trichinella spp. in the North of Russia are analyzed. Circulation of the infection is carried out with participation of the limited quantity of species of sus-ceptible animals in difficult geographical and climatic conditions that causes high stability of the parasite to low tempera-tures. Taking into account presence ge-netically resistant to such condi…
1246	Prevalence of Trichinella infection in Yakutia	2014	Наука И Образование: Современные Тренды	Russia	Yakutia		Wild animals	Brown bear, white bear	Parasite	Trichinella	The analysis of epidemiological and epizootic situation оn Trichinella infection in the Republic of Yakutia for last three years is represented. Trichinella infection is spread among wild animals. T. spiralis (nativa) occurs in brown bears as while T. pseudospiralis infection in polar bears.
1247	Trichinosis of sled and stray dogs of coastal settlements of Chukotka autonomous district	2012	Вестник Ульяновской Государственной Сельскохозяйственной Академии	Russia	Chukotka autonomous district		Multiple	sled and stray dogs, marine mammals	Parasite	Trichinella	It is established that the source of the infection of sled and stray dogs in coastal settlements is the meat of sea mammals. The contamination of sled dogs is 68,4%, stray - 92,8%. The average number of larvae in 1 g of muscle tissue in the stray dogs is almost 6 times higher compared to sled ones. The distribution of larvae of trichina in a different muscle groups is of the aggregate nature.
1248	Trichinella spp. infection among wild animals in Yakutia	2017	Теория И Практика Борьбы С Паразитарными Болезнями	Russia	Yakutia		Multiple	brown bear, wolf, Arctic fox, fox, sable, ermine, mouse-like rodents and domestic dogs, polar bear	Parasite	Trichinella	The main reservoirs of Trichinella in Yakutia are large predators among which brown bear, wolf, Arctic fox and fox are the dominant ones as well as small predators such as sable, ermine, mouse-like rodents and domestic dogs. The brown bear plays a special role in epizootic link being without competitors (or with small number of them); it accumulates infection by consumption of small predators, ro…
1249	Trichinosis in the Far East: Prevalence, pathogenesis, clinical features, treatment, prevention	2014	Бюллетень Физиологии И Патологии Дыхания	Russia	Far East		Multiple/human		Parasite	Trichinella	The prevalence, sources of infection, clinical features, treatment and prevention of trichinosis in the Far East are discussed in this work. The results of personal studies of efficiency of some medications for trichinosis treatment are shown, the increase of anty-trichinella activity of benzimidazole carbomate (parbendazol, fenbendazol, mebendazol) and the weakening of their toxic effect on the …
1250	Prevalence of Trichinella infection in Yakutia	2014	Наука И Образование: Современные Тренды	Russia	Yakutia		Multiple	fox, wolf, brown bear, sable	Parasite	Trichinella	The monograph outlines the most original and valuable results of their study on the infection of wild animal trichinellosis in the territory of Yakutia. Characterized the sources of the spread of dangerous parasitic diseases, sources and routes of transmission of trichinellosis. We studied the distribution of larvae of Trichinella muscle of different species of wild animals in the harsh climatic …
1251	Trichinosis of brown bear and asiatic black bear in the Russian Far East	2015	Вестник Красноярского Государственного Аграрного Университета	Russia	Far East		Bear	brown bear and asiatic black bear	Parasite	Trichinella	The spread of trichinosis in bears and circulation features of the disease in the populations of predators is an important issue, knowledge of which is necessary for the prevention of helminthiasis in humans. The results of studies of biological material from carcasses of brown bears on the trichinosis for 2003- 2007, 2009-2010 for the Kamchatka region and from 2006 to 2011 in the Sakhalin area. …
1252	Contemporary epidemiological situation at trichinellosis in Chukot District of the Chukotka Autonomous Area	2011	Аграрная Наука Евро-Северо-Востока	Russia	Chukotka autonomous district		Marine mammals, walrus	walrus	Parasite	Trichinella	The results of a serological survey for trichinellosis among Chukot indigenous people are presented. The highest susceptibility to trichinella antigens and the highest infection prevalence was observed in patients who consumed meat from marine mammals. It was revealed that trichinella invasion was in the form of larvae carriage.
1253	Serum prevalence of polar bears (ursus maritimus) to various pathogens on the Barents Sea islands	2013	Зоологический Журнал	Russia	Barents Sea islands, Chukotka etc		Polar bear		Multiple	Virus, parasite: Pseudorabies, pseudorabies virus, canine distemper virus, influenza A virus, Dirofilaria sp., Trichinella sp, Toxoplasma gondii	Serum prevalence of 26 polar bears of the Barents Sea to six pathogens was analyzed. There were found individuals seropositive to pseudorabies virus (9.5%), canine distemper virus (12), influenza A virus (8), Dirofilaria sp. (5.3), Trichinella sp, (60), and Toxoplasma gondii (7.4%). The percentage of seropositive animals was maximal for Trichinella sp. The main part of seropositive animals was ad…
1254	Role marine mammals in distribution of trichinellosis in Chukotka District	2012	Российский Паразитологический Журнал	Russia	Chukotka District		Marine mammals		Parasite	Trichinella	The epizootic situation on trichinellosis on the coast of Lorino village located in Chukotka District is studied. Trichinellosis was revealed in 3 marine mammal species. The Trichinella prevalence rate varied from 1,5 % in walrus to 4,3 % in bearded seal. The role of marine mammals in accumulation and dissemination of infective Trichinella spp. larvae in the area is studied
1255	Trichinella circulation on the sea coasts of Chukotka	2011	Вестник Ульяновской Государственной Сельскохозяйственной Академии	Russia	Chukotka		Marine mammals, walrus		Parasite	Trichinella	We revealed eight animal species that are Trichinella carriers on the sea coasts. The prevalence varied from 1,6% to 92,8%, depending on the species. The main routes of transmission of Trichinella infection among the animal populations in and around the village of Lorino were predation, necrophagy, and cannibalism.
1256	Spread of trichinosis in Yakutia	2007	Сибирский Вестник Сельскохозяйственной Науки	Russia	Yakutia		Wild animals		Parasite	Trichinella	The article briefly describes the history of the discovery of trichinosis as a zoonosis. Periodicals, epidemiological reports and other literature sources on the spread of this infestation among wild animals and humans on the territory of the Russian Federation were analyzed along with the description of the localization of trichina in muscle tissue of different animal species, what is of great i…
1257	Dissemination of trichinellosis (Trichinella Railliet, 1895) in preying mammals within Yakutia area	2015	Российский Паразитологический Журнал	Russia	Yakutia		Wild animals		Parasite	Trichinella Railliet	Materials and methods. Epizootic situation and distribution of trichinellosis in carnivorous mammals (wolf, fox, white bear, brown bear, wolverine, lynx) in the territory of Yakutia were studied. Trichinellosis was detected in five of six examined animal species. Results and discussion. The extension of infection caused by Trichinella spp. was in wolf 15,2 % (13 regions of Yakutia were investigat…
1258	Polihostality as the main index of environmental valence of trichina on the territory of Chukotka	2017	Международный Научно-Исследовательский Журнал	Russia	Chukotka		Marine mammals		Parasite	Trichinella	The paper determines the hostal component of Trichina on the territory of Chukotka among the potential host species, inhabitants of the aquatic and terrestrial ecosystems. Infection of marine mammals ranges from 0.94 to 4.30%. Among ground-based predators, including animals of cellular contents and domestic animals, the infection reached 75.2% (from 21.4% among white Arctic Fox to 90.9% among dom…
1259	Molecular-taxonomic study of trichinella in terrestrial and marine mammals of Chukotka	2013	Теория И Практика Борьбы С Паразитарными Болезнями	Russia	Chukotka		Multiple	terrestrial and marine mammals of Chukotka	Parasite	Trichinella	No English abstract
1260	Methodological provisions for the prevention of trichinosis in the territory of the Chukotka peninsula	2014	Российский Паразитологический Журнал	Russia	Chukotka		Multiple		Parasite	Trichinella	It is established that on the Arctic coasts the causative agent of trichinellosis is Trichinella nativa. Trichinella circulate in populations of wild predatory animal land and water ecosystems, among the sinantropic and pets, and also animals of cellular cultivation, when conducting traditional economic activity of indigenous people which promotes maintenance natural the center. The main ways of …
1261	Investigation of the localization of Trichinella larvae in muscle from wild carnivores	2014	Фундаментальные И Прикладные Исследования В Современном Мире	Russia	Yakutia		Wild animals	Brown bear, fox, wolf	Parasite	Trichinella	The main reservoir of Trichinella in Yakutia are small and large predators. Among them are the larvae of Trichinella infection of capsular in the first place a brown bear, then wolf, fox, fox and beskapsulnymi Trichinella infected with polar bears. Of particular importance in these animals is that without competitor (or in small quantities), they accumulate in themselves due to invasion of small …
1262	Epizootology monitoring of the natural tularemia floodplain-river type focus around Khanty-Mansiysk	2016	Вестник Сургутского Государственного Университета	Russia	Khanty-Mansiysk		small mammals		Bacteria	Francisella tularensis	The paper discusses the main carriers of tularemia infection, emphasizing the water voles contribution. It is shown that parasitic arthropods are long keepers and carriers. A bacteriological survey of the rivers Ob and Irtysh confluence has been performed. In 2015 there was a slow tularemia epizootic in the floodplain and bordering habitats affecting the small mammals. It could not lead to an epi…
1263	Epidemiological and epizootological characteristics of tularemia in the Khanty-Mansiysk autonomous okrug - Ugra	2016	Профилактическая И Клиническая Медицина	Russia	Khanty-Mansi autonomous district – Yugra				Bacteria	Francisella tularensis	The natural foci of tularemia in the Khanty-Mansiysk Autonomous Okrug - Ugra retains its activity and vitality. The natural and climatic conditions of Ugra, as well as the factors of anthropogenic influence, contribute to the formation of the ecological environment favorable for carriers and vectors of tularemia.Purpose: The study of the current state of tularemia foci to optimize preventive and …
1264	Tularemia in the Khanty-Mansi Autonomous District – Yugra	2016	Медицина Кыргызстана	Russia	Khanty-Mansi autonomous district – Yugra		small mammals		Bacteria	Francisella tularensis	The features of epizootic and epidemiological situation of tularemia. The high activity of epizootic small mammals and their role in the formation of urbanicheskih foci of tularemia.
1265	Floodplain range of small mammals in the confluence of the rivers Ob and Irtysh	2015	Вестник Сургутского Государственного Университета	Russia	Khanty-Mansi autonomous district – Yugra		small mammals		Bacteria	Francisella tularensis	The article discusses the species composition and abundance of small mammals in 2013-2015 in the confluence of the rivers Ob and Irtysh. The special role of the water vole in maintaining the natural focus of tularemia is noted.
1267	Comprehensive evaluation of the natural tularemia foci in the confluence of Irtysh and Ob rivers	2017	Проблемы Особо Опасных Инфекций	Russia	Khanty-Mansi autonomous district – Yugra		small mammals and amphibians		Bacteria	Francisella tularensis	Objective of the study is to conduct the complex investigations aimed at identification of circulation pathways of tularemia agent, as well as to define the main carriers and vectors of the disease. Materials and methods. Trap trench method, trap fences and trap-lines were used to catch small mammals for examination. Bacteriological testing on tularemia infection in animals was carried out using …
1269	Insecticide efficiency of preparations in ctenocephalesis in dogs in conditions of the Tyumen city	2017	Ученые Записки Казанской Государственной Академии Ветеринарной Медицины Им. Н.э. Баумана	Russia	Tyumen city		dogs		Parasite	Ctenocephalides	Fleas are a group of blood-sucking arthropods belonging to the Siphonaptera group, they are of great importance in veterinary medicine not only because of their pathogenic activity on the host organism, but also because they are carriers of various diseases such as plague, typhus, encephalitis, hepatitis B and C, tularemia, listeriosis, toxocariasis and others. The most important of these insects…
1275	Evaluation of epidemiological and epizootiological situation on anthrax in 2016, the forecast for 2017	2017	Проблемы Особо Опасных Инфекций	Russia	Russia total/random regions/Yamal				Bacteria	Anthrax	The results of analysis of epidemiological and epizootiological situation on anthrax in the world in 2016 are presented. In the Russian Federation 36 human cases of anthrax are registered. Epizooties are noted in 3 federal districts. Anthrax in humans was detected in neighboring countries of Central Asia, in a number of Asian and African countries. Epizootic foci are identified throughout with pr…
1277	Veterinary problems of northern reindeer breeding and improvement of technology of carrying out of m.ss treatment-and-prophylactic actions	2017	Аграрная Наука Евро-Северо-Востока	Russia	Russia total/random regions		Reindeer		Bacteria	Anthrax	The article presents the stages of research on the development of technology for combating edemagenosis and anthrax of northern reindeer on the basis of the use of compositions of therapeutic and prophylactic drugs from the group of Iver-, Avermectins and the antiviral vaccine strain 55 VNIVViM. The need to conduct surveys is motivated by the advisability of combining two massive annual planned m…		Vaccination study
1281	The species and genetic diversity of Trichinella from members of the canine family (Canidae) in Russia	2013	Актуальные Вопросы Ветеринарной Биологии	Russia	Russia total/random regions/Sakha		Canine animals	wolves, foxes, artic foxes, corsac, jackals, raccoon dogs	Parasite	Trichinella	The species and genetic diversity of the Trichinella in Russia from six species of canine: wolves, foxes, artic foxes, corsac, jackals, raccoon dogs was analyzed. Recorded four species of Trichinella T. pseudospiralis, T. spiralis, T. nativa and T. britovi. Genotype for three encapsulated species of Trichinella was determined. The mtDNA cytochrome c oxidase subunit I (cox1) 1545 base pairs in len…
1285	Anthropozoonoses of invasive etiology of commercial animals and fish in the republic of Sakha (Yakutia)	2015	Достижения Науки И Техники Апк	Russia	Yakutia		Multiple		Parasite	Parasite: Trichinella, alveococcus, tapeworm, Diphyllobothrium dendriticum, Diphyllobothrium latum, echinococcus	The analysis of the epizootological situation on the main anthropozoonoses of invasive etiology of commercial animals and fish in the Republic of Sakha (Yakutia) was carried out. The foci of trichinosis were established throughout the territory of the republic. The main carriers of the disease are wolves (48.4%) and brown bear (42.7%), the minor ones are foxes (3.5%), polar foxes (7.19%) and othe…		New, was missing in the table
1302	Emerging viral infections as expected threats to public health and animal breeding in the Far North in conditions of global warming	2017	Научный Вестник Ямало-Ненецкого Автономного Округа	Russia	Far North		Multiple		Multiple		The term "emerging infections" emerged because global changes in climate, human and animal migration and the transformation of nature had led to changes in the pattern and spread of infectious diseases, especially of a viral nature. As a result, the virus of dengue fever actually spread almost to the entire tropical belt, the West Nile virus came to the American continent, and the chikungunya vir…

## Sheet: Fish_Eng
Article ID	Title	Year of Publication	Journal	Country	Region/ Province	City/ Town	Animal(s)	Multiple animals:	Infectious Agent Group (i.e. Bacteria, parasite, virus)	Infection(s)	Multiple infections	Objective of article	Main results	Arctic or not	Notes
400	Infection of whitefish (Coregonus lavaretus L. s.l.) by Triaenophorus crassus Forel (Cestoda: Pseudophyllidea): a case study in parasite control	1990	Canadian Journal of Zoology	Norway	Nothern Norway	Stuorajavri	Multiple	Whitefish and pike	Parasite	Triaenophorus crassus, Diphyllobothrium ditremum		To study parasite control in two populations of fish	Reduction in parasite population could have resulted from decrease in population of pike (final host) and decrease in population density of white fish	Arctic
401	On the infracommunity structure of adult cestodes in freshwater fish	1990	Parasitology	Finland	Bothnian Bay and Lake Yli-Kitka	x	Multiple	Whitefish and pike	Parasite	Cestodes		To investigate adult cestodes in freshwater fish	Prevalence of cestodes in fish is listed for multiple species
402	Circulation of parasites among fishes from lakes in the Caribou Mountains, Alberta, Canada	2003	Journal of Parasitology	Canada	Alberta	Caribou Mountains	Multiple	12 species	Parasite	24 species		To explore the circulation of parasites in 9 lakes	24 macroparasites were found among 12 species of fish
404	Plerocercoids of the cestode Diphyllobothrium ditremum in brown trout Salmo trutta: substantial increase in infection after establishment of European minnow Phoxinus phoxinus	2017	Journal of Fish Biology	Norway	South-central Norway	Lake Øvre Heimdalsvatn	Salmo trutta		Parasite	Diphyllobothrium ditremum		To examine the change in infection in trout after introduction of European minnow	D. ditremum found in 40% of sampled S. trutta
405	Parasite fauna of landlocked Dolly Varden (Salvelinus, Salmonidae) from the riverâ€“lake system of Uzon caldera (Kamchatka)	2015	Journal of Icthyology	Russia	Kamchatka	Uzon caldera	Dolly Varden		Parasite	12 species found		To research parasites in landlocked populations of Dolly Varden	Rate of parasite infections for 12 species included	Arctic
406	Specific features of ecology of chars of the genus Salvelinus (Salmonidae) from the basin of Lake Kronotskoe (Kamchatka) according to parasitological data	2008	Journal of Icthyology	Russia	Kamchatka	lake Kronotskoe	Salvelinus spp.	S. malma, S. albus, S. schmidtii, S. kronocius	Parasite	23 species found		To study parasites in chars in Lake Kronotskoe	23 parasites were found, rate of infections are included	Arctic
407	Report on anisakid nematodes in polar regions - Preliminary results	2009	Polar Science	Norway	Svalbard		Multiple	Liparis liparis, Salvelinus alpinus, Myoxocephalus scorpius, Boreogadus saida	Parasite	Anisakids		To investigate Anisakid infections in the polar regions	Anisakis simplex found in Arctic cod	Arctic	Also includes Antarctic region
409	Detection of Proteins from the Fish Parasite Anisakis simplex in Norwegian Farmed Salmon and Processed Fish Products	2015	Food Anal. Methods	Norway	Retail stores in Oslo		Multiple	105 seafood products	Parasite	Aniskasis simplex		To detect proteins from Anisakis simplex in commerically available fish proucts	Anisakis simplex proteins occurred in trace ammounts in a few samples, suggesting it is not an immediate health concern
410	Influence of four species of helminth parasites on orientation of seaward migrating sockeye salmon (Oncorhynchus nerka) smolts	1990	Canadian Journal of Fisheries and Aquatic Sciences	Canada	British Columbia	Great Central Lakes area, Vancouver Island	Sockeye salmon		Parasite	Eubothrium salvelini, Diphyllobothrium dendriticum, Proteocephalus sp. And Philonema oncorhynchi		To investigate if helminth infections affected orientations of salmon smolts	Results suggest that parasites may interfere with smolt orientation
411	Cannibals and parasites: Conflicting regulators of bimodality in high latitude Arctic char, Salvelinus alpinus	2003	Oikos	Norway	Svalbard		Salvelinus alpinus		Parasite	Diphyllobothrium ditremum		To explore the unexploited populations of Arctic char in Svalbard	Cannibalism was found to result in accumulation of cestodan parasites, esp. Diphyllobothrium ditremum	Arctic
412	Latitudinal variations in the occurrence of some cod parasites along the west coast of Norway	2013	Marine Biology Research	Norway	West coast - 4 locations along the coast of Norway	Øksfjord (Finnmark), Kvarøy (Nordland), Brønnøysund (Nordland) and A˚lesund (Møre og Romsdal)	Cod and gadoid fish		Parasite	Hemiurus communis, F. levinseni, Prosorhynchoides borealis, Diphyllobothrium phocarum		To examine how latitude varaitions affected parasite infection in cod	Latitude variations occur because of parasite life cycle, prevalence at each location and by parasite is given
413	Ontogenetic dynamics of infection with Diphyllobothrium spp. cestodes in sympatric Arctic charr Salvelinus alpinus (L.) and brown trout Salmo trutta L	2016	Hydrobiologia	Norway	Nothern Norway	Lake Takvatn	Multiple	Arctic charr and brown trout	Parasite	Diphyllobothrium spp.		To investigate how infections of D. dendriticum and D. ditremum differ between charr and trout	Prevalence of D. ditremum was higher in charr (61.5%) than trout (39.5%), but prevalence of D. dendriticum was higher in trout (31.2%) than charr (19.3%)	Arctic
414	Anisakis simplex (s.s.) larvae in wild Alaska salmon: No indication of post-mortem migration from viscera into flesh	2011	Diseases of Aquatic Organisms	United States	Alaska	Codova, Bristol Bay and Prince William Sound	Alaskan salmon		Parasite	Aniskasis simplex		To determien the prevalence, mean intensity, and distribution of Anisakis L3 larvae in wild salmon	All caught fish were infectied and more than 90% were in edible meat	Arctic
416	Arctic charr in sympatry with burbot: Ecological and evolutionary consequences	2010	Hydrobiologia	Norway	Subarctic Norway	Lille Rostavatn (69 000N, 19 f350E, 102 m a.s.l.), Fjellfrøsvatn (69 050N, 19 200E, 125 m a.s.l.) and Takvatn (69 070N, 19 050E, 215 m a.s.l.) are situated in separated branches of the Ma ˚lselv drainage system while Carajavri (69 250N, 22 850E, 611 m a.s.l.) drains to the Alta-Kautokeino watercourse	Multiple	Arctic charr and burbot	Parasite	Diphyllobothrium spp.		To explore the relationship between charr and burbot in terms of ecology	Parasite investigation was included, indicating high parasitic infection, but I can't find this data
417	Aggregation of helminths: The role of feeding behavior of fish hosts	2004	Journal of Parasitology	Norway	Northern Norway	Fjellfrøsvatn	Salvelinus alpinus		Parasite	D. dendriticum, D. ditremum, Cystidicola farionis and Cyathocephalus truncatus		To determine how parasite distribution coreesponded with fish behavior and diet	Detailed statistical analysis of fish parasites provided	Arctic
418	Diphyllobothrium nihonkaiense Tapeworm Larvae in Salmon from North America	2017	Emerging Infectious Diseases	United States	Alaska		Salmon		Parasite	D. nihonkaiense		Letter reporting occurrence of D. nihonkaiese in caught salmon	Describes parasite, but not prevlaence information	Arctic	This is a letter, not an original paper
419	Effects of fish species composition on Diphyllobothrium spp. infections in brown trout - is three-spined stickleback a key species?	2016	Journal of Fish Diseases	Norway	Northern Norway	Nordland and Troms county	Multiple	Trout, charr, and stickleback	Parasite	Diphyllobothrium spp.		To explore the associations of fish prey and Diphyllobothrium spp. infections	Mean abundance, prevalence, and mean intensity is given for each species	Arctic
420	A simplified method to estimate Diphyllobothrium spp. infection in salmonids	2016	Journal of Fish Diseases	Norway	Northern Norway	Nordland and Troms county	Multiple	Trout and charr	Parasite	Diphyllobothrium spp.		To compate the number of cysts to the conventional digestive technique to see if it is a comparable method	Results suggest that the CYST method can be a good indication of D. spp. intensity, abundance, and prevalence	Arctic
421	Parasite communities of two three-spined stickleback populations in subarctic Norway-effects of a small spatial-scale host introduction	2015	Parasitology Research	Norway	Northern Norway	Troms County	Sticklebacks		Parasite	Multiple		To examine parasites in introduced stickleback populations and source populations	Parastite infections were higher in introduced fish, and had 3 unique parasite spp.	Arctic
422	Relationship between red vent syndrome and anisakid larvae burden in wild Atlantic salmon (Salmo Salar)	2013	Journal of Wildlife Diseases	Canada		9 rivers that empty into the estuary and gulf of St. Lawrence	Atlantic salmon		Parasite	Aniskasis simplex		To examine the relationship between red vent syndrome and A. simplex infection in Atlantic salmon	Not a strong relationship between A. simplex infection and red vent syndrome
423	Sealworm (Pseudoterranova decipiens) infection in grey seals (Halichoerus grypus), cod (Gadus morhua) and shorthorn sculpin (Myoxocephalus scorpius) in the Baltic Sea	2015	Parasitology Research	Sweden	Baltic Sea	Map included	Multiple	Grey seals, cod, and shorthorn sculpin	Parasite	Anisakids		To examine the prevalence of sealworm (pseudoterranova decipiens) in seals, cod, and shorthorn sculpin	Sculpin were generally more infected than cod in both prevalence and abundance of parasites
425	Anisakid larva in the viscera of a farmed Atlantic salmon (Salmo salar)	2008	Aquaculture	Canada	British Columbia		Atlantic salmon		Parasite	Anisakids		To investigate Anisakid larva in farmed salmon	Farmed salmon have much lower prevalence (0.11%) compared to wild salmon
426	Presence of Anisakis simplex (Rudolphi, 1809 det. Krabbe, 1878) and Hysterothylacium aduncum (Rudolphi, 1802) (Nematoda; Anisakidae) in runts of farmed Atlantic salmon, Salmo salar L	2014	Journal of Fish Diseases	Norway	Slaughter plant in Norway		Atlantic salmon		Parasite	Anisakis simplex, Hysterothylacium aduncum		To investigate the prevalence of A. simplex and H. aduncum in farmed Atlantic salmon	75 nematodes were found in 10 (20%) of the runts	NA
427	Occurrence of anisakid nematodes in Atlantic cod (Gadus morhua) and Greenland cod (Gadus ogac), West Greenland	2010	Acta Parasitologica	Greenland	West Greenland		Cod	Atlantic cod and Greenland cod	Parasite	Anisakids		To determine the occurrence of Anisakid nematodes in Greenland	Prevalence of differnce Anisakid spp. described
429	Parasites as biological tags to track an ontogenetic shift in the feeding behaviour of Gadus morhua off West and East Greenland	2015	Parasitology Research	Greenland	West and East Greenland		Atlantic cod		Parasite	Multiple		To compare differences in parasite abundance and morphology of Atlantic cod in Greenland	Nematoda were the most abundance parasite group (prevalence of f85% W. Greenland and 100% E. Greenland)	Arctic
430	On the infecstation of musculature in the pacific salmons from okhotsk sea at early sea stage of their life	2009	Parazitologiia	Russia	Okhotsk Sea and near Kuril islands in Pacific Ocean waters		Pacific salmon		Parasite	Anisakis sp., Diphyllobothriuidae		To determine the level of infection in juvenille Pacific salmon	Differences in infection varied by migration		Article in Russian, https://www.zin.ru/journals/parazitologiya/content/2009/prz_2009_6_5_Nomokonova.pdf
431	Composition and structure of the parasite faunas of cod, Gadus morhua L. (Teleostei: Gadidae), in the North East Atlantic	2008	Parasites & Vectors	Multiple	Baltic, Celtic, Irish, North Seas, Icelandic waters, and Norway		Cod		Parasite	57 parasites were found		To examine parasite abundance and distribution in North Atlantic cod	Larval anisakids comprised 58.2% of parasites found
432	Prevalence of zoonotic anisakid nematodes in inuit-harvested fish and mammals from the Eastern Canadian arctic	2012	Foodborne Pathogens and Disease	Canada	Nunavik, Nunavut, and Nunatsiavut	Inuit regions	Multiple		Parasite	Anisakids		To examine Inuit fish and mammals for Anisakid nematodes	Atlantic tomcod, polar cod, and sculpins represented the greatest risk for food-borne illness. Found in 7/8 fish species	Arctic
433	Cestode larvae Diphyllobothrium dendriticum as a cause of heart disease leading to mortality in hatchery-reared sea trout and brown trout	1996	Diseases of Aquatic Organisms	Finland	Northwestern Finland		Trout	Farm raised sea and brown trout	Parasite	Diphyllobothrium dendriticum		To examine D. dendriticum as the cause of death in farm raised trout	D. dendrticum found in low prevalence of live fish, in 86% of dead fish	Arctic
434	Occurrence of cestode larvae in brown trout after stocking in a large regulated lake in northern Finland	1997	Diseases of Aquatic Organisms	Finland	Northern Finland	Lake Inari	Brown trout		Parasite	Cestodes		To investigate the larval cestode infections of brown trout in Lake Inari	D. dendritcum was the dominant species with prevalence 75%.	Arctic
435	Natural transfer of helminths of marine origin to freshwater fishes, with observations on the development of Diphyllobothrium alascense	2000	Journal of Parasitology	United States	Alaska	lower Kuskokwim River	Burbot		Parasite	Multiple		To investigate natural helminth infections in burbot		Arctic
437	Tissue distribution of anisakis simplex larvae (nematoda; anisakidae) in wild atlantic salmon, salmo salar, from the drammenselva river, south-east norway	2013	Bulletin- European Association of Fish Pathologists	Norway	South-East Norway	Drammenselva River	Atlantic salmon		Parasite	Aniskasis simplex		To investigate prevalence nd tissue distribution of A. simplex in wild Atlantic salmon	A. simplex found in 61% of viscera and 39% in musculature	Not
439	Growth of whaleworm (Anisakis simplex, Nematodes, Ascaridoidea, Anisakidae) third-stage larvae in paratenic fish hosts	2003	Parasitology Research	Norway	West coast	Island of Vega on the west coast of central Norway (65 46’E, 11 54’N)	Multiple	Saithe, cod, and red fish	Parasite	Aniskasis simplex		To examine the growth of L3 larvae in 3 hosts	A positive correlation with fish age and accumulation was observed
441	Host size-dependent anisakid infection in Baltic cod Gadus morhua associated with differential food preferences	2016	Diseases of Aquatic Organisms	Multiple	Baltic Sea	North Sea/ Danish straits collected by trawl (water depth 57−77 m; 54.45° to 55.45°N, 014.30° to 016.30°E) except for 11 cod taken by a local fisherman (trawl) at position 55.04°N, 014.50°E	Baltic cod		Parasite	Anisakids		To determine the prevalence of parasites in Baltic cod	Prevalence of C. oscultaum and P. decipens is low in juvenile cof, but increases in larger cod,

## Sheet: Fish_Rus
Article ID	Title	Year of Publication	Journal	Country	Region/ Province	City/ Town	Animal(s)	Infectious Agent Group (i.e. Bacteria, parasite, virus)	Infection(s)	Main results	Notes
1000	Diversity of conditionally pathogenic microorganisms in fish industry facilities in Karelia	2010	Хранение И Переработка Сельхозсырья	Russia	Karelia		Trout (farmed)	Bacteria	Moraxella, Seratia, Escherichia, Pseudomonas, Acinetobacter, Enterobacter	Bioproduction in lakes with fish farming and water quality depend on the structure and operation of the aquatic ecosystem. A crucial role in a lake is played by microorganisms. They participate in the processes of self-purification, enrich the environment with useful elements, have the highest rate of reproduction, and control the biomass of all elements of the food chain. Upsetting the steady st…
1001	Diagnosis of the aeromonosis in salmon of Magadan region	2011	Международный Вестник Ветеринарии	Russia	Magadan region		Pacific salmon	Bacteria	Aeromonas hydrophila	Presents the results of studies of bacterial diseases ihtiopatologicheskih producers of Pacific salmon on natural populations of hatchery area. Established that the infection of fertilized eggs bacteria Aeromonas hydrophila is in the process of obtaining sexual products from manufacturers on the spawning grounds during their spawning migration or through infected water, where the patients live fi…
1002	Ecological analysis of helminths in vendace and smelt from the Onega lake	2016	Труды Карельского Научного Центра Российской Академии Наук	Russia	Karelia, Onega lake		Vendace and smelt	Parasite	Helminths, Eubothrium crissum	The parasite fauna of Lake Onego commercial fish species - vendace, Coregonus albula L., and smelt, Osmerus eperlanus L., was studied. The prevalence, abundance distribution and age structure of the cestode Proteocephalus longicollis (Zeder, 1800) in vendace were determined. Seasonal variations of Eubothrium crissum (Bloch, 1779) infection in vendace were traced, and the role of vendace in the li…
1003	Fauna of parasites of salmon fishes (salmonidae, pisces) of the Onega and Ladoga lakes	2014	Наука И Мир	Russia	Karelia, Onega and Ladoga lakes		Salmon and trout	Parasite	Genus Corynosoma, Gyrodactylus salaris	It is studied the fauna of parasites of fresh-water forms of a salmon (Salmo salar L.) and trout (S. trutta L. ) of the Onega and Ladoga. It is defined its similarity. One of the main distinctive signs the fauna of parasites of the Ladoga fishes is reduced to infection of them by proboscis worms of genus Corynosoma. Being sea relicts, they serve as the evidence of former relations of the Ladoga w…
1004	Condition of gonads in salmon fish in the subarctic lakes of Yamal and Gydana	2012	Вестник Тюменского Государственного Университета. Экология И Природопользование	Russia	Yamal and Gydana peninsula		Salmon, Arctic charr and Coregonus	Parasite	Helminths	The state of gonads in Arctic char and coregonids in the lakes of the Subarctic tundra of Gydan and Yamal peninsulas is investigated. There is used a technique of total accounting of oocytes using a laser scanning microscope. Despite the weak development of fodder base, high infestation by helminthes and a very short period of feeding, the studied fishes have no violations of gametogenesis, but s…
1005	Current infestation status of Atlantic salmon with Anisakis simplex larvae in the river Ponoi (the Murmansk region)	2017	Вестник Мурманского Государственного Технического Университета	Russia	Murmansk region, river Ponoi		Atlantic salmon	Parasite	Anisakis simplex, Anisakidosis, Red Vent Syndrome	The infestation of Atlantic salmon with larvae of nematode Anisakis simplex has been studied in recreational catches in the River Ponoi of the Murmansk Region by using data from field research. The level and dynamics of infestation of autumn Atlantic salmon in 2009-2016 have been determined in comparison with the historical data. The results of research have shown that the proportion of salmon in…
1007	The role of acclimatisation in the formation of parasite fauna in the European smelt osmerus eperlanus in the Sjamozero lake (Karelia)	1999	Паразитология	Russia	Karelia, Sjamozero lake		European smelt Osmerus eperlanus (L.)	Parasite	17 parasites found Camallanus, Diplostomum, Ichthyocotylurus, Trichodina, Capriniana, Glugea	The formation of parasite fauna in the european smelt Osmerus eperlanus (L.) accidentally introduced into the Sjamozero Lake ecosystem (South Karelia) have been analysed. The data for the study was obtained during the period of 1969—1996. It is found out, that the parasite species diversity developed from 3—4 species in the beginning of the study up to 17 species in 1996. The parasite fauna of th…
1008	Response of the Atlantic salmon salmo salar population of the Keret’ river on the invasion of parasite gyrodactylus salaris malmberg	2011	Российский Журнал Биологических Инвазий	Russia	Karelia, Keret river, White Sea basin		Atlantic salmon	Parasite	G. salaris	Since 1992, most juvenile Atlantic salmon Salmo salar from the Keret' River (White Sea basin) have been infected with the dangerous parasite G. salaris almost every year. Decreasing the population size, G. salaris affected salmon gene pool. Wild juveniles from the Keret', in contrast to juveniles from other rivers, were found to have a higher fluctuating asymmetry of scull bones in comparison wit…
1009	Population dynamics of the number of glokhidia of freshwater pearls Margaritifera margaritifera L., parasitiating on young salmon fishes of northern reservoirs	2009	Известия Российской Академии Наук. Серия Биологическая	Russia	Karelia, Gridina river		Atlantic salmon	Parasite	Glochidia, freshwater pearl mussel Margaritifera margaritifera L.	This paper presents data on the population dynamics of glochidia of the freshwater pearl mussel Margaritifera margaritifera L. (1758) (a declining species of European fauna), parasitizing on juvenile Salmonidae fishes in rivers of northern Europe. It was found that the number of glochidia parasitizing on gills of juvenile salmon and trout in explored water reservoirs are stimulated by negative bi…
1010	Nutrition value and main invasion diseases of Yakut crucian (carassius jacuticus, Kirillov)	2018	Международный Научно-Исследовательский Журнал	Russia	Yakutia		Yakut Crucian	Parasite	Genus Myxobolus, myxosporidiosis caused by the genus Myxobolus, digrammosis and phyllometroidosis	The article presents the results of researches of nutrition value, and a degree of infection of a crucian in the Yakut lake of the Central Yakut plain of the Republic of Sakha (Yakutia) are given. It is established that the high fat content (up to 10% vs. 2.5%), the high content of polyunsaturated fatty acids, macro- and microelements, vitamins, have a high energy value in comparison with the Eur…
1011	The first data on parasites in oncorhynchus masou salmon (salmonidae), Kamchatka peninsula	2009	Вестник Северо-Восточного Научного Центра Дво Ран	Russia	Kamchatka		Masu salmon	Parasite	Helminth, Salmonchus alaskensis (Monogenea. Tetraonchidae)	This paper presents the results of the first study of parasites in the masu salmon in Kamchatka. Nine helminth species were reported in masu salmon parrs and dwarf males from the Utkholok River Area, western Kamchatka. No parasite species specifically peculiar of masu salmon are found. The paper includes the morphological description and a figure of Salmonchus alaskensis (Monogenea. Tetraonchidae…
1012	Parasites of whitefish and Arctic loach of the Yamal peninsula	2000	Научный Вестник Ямало-Ненецкого Автономного Округа	Russia	Yamal peninsula		Whitefish, Artcic loach	Parasite	17 helmints	No English abstract
1013	Parasites of underyearling Kamchatka mykiss parasalmo mykiss mykiss (osteichthyes: salmonidae) in the Utkholok river (north-western Kamchatka)	2010	Паразитология	Russia	Kamchatka, Utkholok river		Kamchatka mykiss	Parasite	Apiosoma piscicolum piscicolum, Apatemon sp., Diplostomum sp., Bunoderidae gen. sp., Crepidostomum metoecus, Hysterothylacium gadi aduncum, Salvelinema salmonicola, and Cucullanus truttae	Eight species of parasites, Apiosoma piscicolum piscicolum, Apatemon sp., Diplostomum sp., Bunoderidae gen. sp., Crepidostomum metoecus, Hysterothylacium gadi aduncum, Salvelinema salmonicola, and Cucullanus truttae had been found in underyearling Kamchatka mykiss (with fork length 28-41 mm) from the Utkholok River, North-Western Kamchatka. Infestation rate of the fishes with each parasite specie…
1014	Parasites of egg, larvae and juvenile pink salmon Oncorhynchus gorbuscha (Walbaum)	2002	Исследования Водных Биологических Ресурсов Камчатки И Северо-Западной Части Тихого Океана	Russia	Kamchatka		Salmon: Oncorhynchus gorbuscha Walbaum (Salmonidae)	Multiple	In farmed humpback salmon parasites Ichthyobodo necator, Chilodonella piscicola,Tetrahymena pyriformis, Vorticella sp., Entamoebasp., and fungi Saprolegnia. In wild humpbakc salmon - parasites Ichthyobodo necator,Chilodonella piscicola, Tetrahymena pyriformis,Apiosoma conicum, Trichodina truttae и один видпиявок — Paracanthobdella livanowi,	No English abstract
1015	The parasites of sticklebacks (gasterosteidae) from the Utkholok river (northwestern Kamchatka)	2010	Вестник Северо-Восточного Научного Центра Дво Ран	Russia	Kamchatka, Utkholok river		Sticklebacks and Pungitius fishes, three-spine, nine-spine and the Amur sticklebacks	Parasite	Zschokkella orientalis, Myxobolus muelleri, Henneguya pungitii, Gyrodactylus sp., Gyrodactilus alexanderi, Ergasilus cf. auritus, Phyllodistomum maritae and Diplostomum and Apatemon metacercariae. The Zschokkella orientalis myxozoan and Gyrodactylus alexanderi monogenean, Allobunodera mediovitellata trematodes and Eustrongylides nematodes	This paper presents the results of studies of parasites living in sticklebacks inhabiting the Utkholok River and its tributaries over northwestern Kamchatka and represented by its three forms as the three-spine, nine-spine and the Amur sticklebacks. As a result of these parasitologic studies, 36 species taxa are reported. The morphological description includes Zschokkella orientalis, Myxobolus mu…
1016	Kokanee oncorhynchus nerka walb. parasites and feeding in Tolmachevskoye reservoir, Kamchatka	2017	Исследования Водных Биологических Ресурсов Камчатки И Северо-Западной Части Тихого Океана	Russia	Kamchatka, Tolmachevskoye reservoir		Kokanee	Parasite	Diplostomum gasterostei and mixosporea Myxobolus arcticus	Only two parasite species were found in isolated kokanee population in Tolmachevskoye Reservoir: trematode Diplostomum gasterostei Williams, 1966 and mixosporea Myxobolus arcticus Pugatschov et Khokhlov, 1979. Groups of kokanee with different numbers of gill rakers did not demonstrate differences in the type of feeding or extent of infestation of the parasites
1017	Parasite fauna of the landlocked sockeye salmon (oncorhynchus nerka) of the lake kronotskoe (Kamchatka)	2016	Паразитология	Russia	Kamchatka, lake Kronotskoe		Landlocked Sockeye Salmon, Oncorhynchus Nerka	Parasite	Myxosporea, Monogenea, Trematoda, Cestoda, Nematoda, Acantocephala, and Crustacea	Parasites of the landlocked sockeye salmon Oncorhynchus nerka Walbaum, 1792 of the Lake Kronotskoe are described for the first time. Twenty parasite species belonging to 7 classes were found, including Myxosporea, Monogenea, Trematoda, Cestoda, Nematoda, Acantocephala, and Crustacea. In comparison with benthivorous fishes (< 39 gill rakers), infected mostly by Crepidostomum metoecus (Braun, 1900)…
1018	The fauna of parasites and parasitic diseases of fish grown in cage farms in the European part of Russia	2017	Паразитология	Russia	European part of Russia		Farmed fish	Parasite	Sphaerospora renicola (carp), Myxobolus dogieli (carp), Capriniana piscium (rainbow trout), Ambiphrya ameiuri (channel catfish), Dactylogyrus vastator (carp), Gyro-dactylus truttae (salmon), Proteocephalus exiguous rainbow trout), Ergasilus sieboldi (whitefish).	This article provides information about parasites of rearing fish in cage farms in the european part of Russia, surveyed in the period from 1996 to 2016. The fauna of parasites of cage fish comprised 52 species of parasites, including 27, 9, 5, 3, 1, 1, 1, and 5 species of protosoans, monogeneas, cestodes, trematodes, nematodes, annelids, clams, and crustaceans. Most of them are reprezented by sp…
1019	Parasites fauna of the lake Kronotskoe charrs (salvelinus), Kamchatka	2016	Паразитология	Russia	Kamchatka, lake Kronotskoe		Sympatric charr, Bigmouth and Smallmouth charr, Longhead charr, Nosed charr and White charr	Parasite	Oligohymenophorea, Myxosporea, Monogenea, Trematoda, Cestoda, Nematoda, Acantocephala, Crustacea and Hirudinea. Proteocephalus longicollis, Neoechi- norhynchus salmonis, Crepidostomum, andP. longicollis, Crepidostomum spp. Cyathocephalus truncates, and Cystidicola farionis; Diplostomum, Phyllodistomum umblae. P. longicollis and Eubothrium salvelini, longicollis (abundance 67.0) and Diplostomum sp.	The new data on the parasites fauna of the Lake Kronotskoe sympatric charr forms (genus Salvelinus (Nilsson) Richardson, 1836) is presented. Parasites fauna of Bigmouth and Smallmouth charr forms are described for the first time. The information about Longhead charr, Nosed charr and White charr parasites is added. 29 species of parasites from 9 classes were found: Oligohymenophorea, Myxosporea, M…
1020	Feeding peculiarities in Atlantic salmon fry (salmo salar l.) infected with invasive parasite gyrodactylus salaris in river Keret	2015	Российский Журнал Биологических Инвазий	Russia	Karelia and Kola Peninsula		Atlantic salmon	Multiple	Ichthyobodo necator, Chilodonella piscicola, Tetrahymena pyriformis, Entamoeba sp., Vorticella sp., and fungi Saprolegnia	Young Atlantic salmon inhabiting the Keret River (the White Sea basin) and infected with invasive monogeneans - Gyrodactylus salaris - shows very low feeding intensity because of physical weakness in summer. Only a few individuals of benthic invertebrates - caddis fly larvae, nymphs, stoneflies and mayflies, and molluscs are found in the stomachs of infected patients and fingerling salmon. Compar…
1021	Characteristics of the parasite fauna of brown trout (salmo trutta morpha lacustris l.) in lakes of Karelia	2016	Ученые Записки Петрозаводского Государственного Университета	Russia	Karelia, lake Ladoga, lake Onega and lake Pyaozero		Brown trout and lake trout	Parasite	42 different types, incl. Corynosoma semerme	Brown trout (S. trutta L.) occurs widely in northern Europe coastal waters from Cheshskaya Bay in the north to the Black Sea in the south. The paper relates the results of studies on the parasite fauna of brown trout (S. trutta morpha fario) and lake trout (S. trutta morpha lacustris) in Lake Ladoga, Lake Onega and Lake Pyaozero. Comparative analysis of the parasite faunas in these lakes was carr…
1022	Parasitofauna features of the Ladoga lake vendace coregonus albula	2017	Ученые Записки Петрозаводского Государственного Университета	Russia	Karelia, lake Ladoga, lake Onega		Vendance	Parasite	26 parasites found Myxidium salvelini, Chloromyxum coregoni, Myxobolus evdokimovae, Henneguya zchokkei, Capriniana piscium, Apiosoma piscicolum, Trichodina nigra, Tripartiella copiosa, Triaenophorus crassus, Eubothrium salvelini, Diphyllobothrium ditremum, Proteocephalus longicollis, Phyllodistomum conostomum, Diplostomum gasterostei, D. spathaceum, D. helveticum, Tylodelphys clavata, T. podicipi…	Nowadays much attention has been paid to the parasitological research. Parasitological data show quantitative and qualitative changes in the ecosystem of the waterbody. It helps to determine both new and insufficiently studied sources/foci of parasite infection in people, domestic and wild animals (when its intermediate host is the fish). The research results of the Ladoga Lake vendace parasitofa…
1023	Some types of parasites of salmon fish in Kamchatka, potentially dangerous for human health	2007	Вестник Камчатского Государственного Технического Университета	Russia	Kamchatka		Salmon	Parasite	Diphyllobothrium plerocercoid cestoid and Anisakis nematode maggots	The author represents the results of salmon parasitologic research with respect to the occurrence of Diphyllobothrium plerocercoid cestoid and Anisakis nematode maggots, that are potentially dangerous to human health.
1025	Some features of the biology and parasite fauna of the arctic char (salvelinus alpinus l.) in the lake Mushtalampi (northern Karelia)	2016	Паразитология	Russia	Karelia, Lake Mushtalampi		Arctic charr (dwarf form)	Parasite	Philonema oncorhynchi	The native population of the Arctic char in the Lake Mushtalampi was studied. The dwarf form of the Arctic char inhabiting the lake was revealed. The fish is characterized by extremely low growth rate and by early maturation. Twelve parasite species were found in the arctic char. The parasite fauna is typical of representatives of Salmonidae. Distinguishing features of this fauna include the abse…
1026	Monitoring of the biosystem "Pearl salmon" in the Karelian River Keret’ for the last 17 years	2008	Успехи Современной Биологии	Russia	Karelia, River Keret		Pearl mussel	Parasite	Gyrodactilus	The data on hydrochemistry of the Keret River and changes in the size-age structure of pearl mussel population are presented. The main kinds of threat for the existence of the unique water pool with pearl mussel and salmon populations are discussed. Among them are poaching, incorrect strategy of artificial reproduction of salmon, parasite gyrodactilus, introduced pink salmon, are uncontrolled tou…
1028	Ichthyofauna and fish parasites of the Ungra river (Sakha Yakutia)	2012	Научные Труды Дальневосточного Государственного Технического Рыбохозяйственного Университета	Russia	Yakutia		minnow and grayling	Parasite	Myxosporean, infusorian, monogenean, and trematodes are dominant in minnows, and Ergasilus briani и E. sieboldi live together on the gills, at the same time nematodes predominant in arctic grayling.	Based on the results of original researches new data on the fauna and hosts of fish parasites in Ungra River from the southern Yakutia were received, and 14 species of fish and 45 species of parasites recorded. Myxosporean, infusorian, monogenean, and trematodes are dominant in minnows, and Ergasilus briani и E. sieboldi live together on the gills, at the same time nematodes predominant in arctic…
1030	Results of the study of geographical variability of the parasite fauna and of the structure of component communities of minnow phoxinus phoxinus (linnaeus) parasites. 2. the water bodies of the northeastern European Russia	2016	Паразитология	Russia	Northeast of Russia	Lake Krivoye (Kolguev Island); Volonga, Schapkina, Kolva, More-Yu, Vorkuta, Kara, and Khalmer-Yu Rivers; Lakes Nikaramata (the Kara River basin) and Mercempertato (Yamal Peninsula)	Minnow	Parasite	3 to 24 parasites found	The material was collected according to commonly accepted methods in 1992-2013 from the following sites: the Lake Krivoye (Kolguev Island); Volonga, Schapkina, Kolva, More-Yu, Vorkuta, Kara, and Khalmer-Yu Rivers; Lakes Nikaramata (the Kara River basin) and Mercempertato (Yamal Peninsula). A total of 436 of the minnow Phoxinus phoxinus with age 1+-3+ were examined. In the examined water bodies, e…	Same to 1029
1031	Results of the study of the geographical variability of the parasite fauna and of the structure of component communities of the minnow parasite phoxinus phoxinus (l.) 1. basins of the Kama and Northern Dvina rivers	2013	Паразитология	Russia	Arkhangelsk region	Kama River, upper Vychegda River, and upper Northern Dvina River	Minnow	Parasite		In the basin of the Kama River, in upper Vychegda River, and in tributaries of the upper Northern Dvina River, the parasite fauna of the minnow is monotonous and component communities of parasites are mature (balanced, according to Pugachev, 1999). They are completely formed in June.
1032	Results of the study of species composition of fish parasites in river basins of the north-east European Russia. Cestoda	2000	Паразитология	Russia	Arkhangelsk region	Severnaya Dvina, Mesen and Pechora rivers	rivers basis fish	Parasite	cestodes	The report contains the results of faunistic study of parasitic cestodes occurring in fishes in the S. Dvina, Mezen' and Pechyora river basins. 26 cestode species have been recorded in the region explored. The cestode fauna in the first basin is represented by 19 species, in the second basin — 14, in the third basin — 18.
1033	Results of the study of species composition of fish parasites in river basins of the north-east European Russia. Trematoda	1997	Паразитология	Russia	Arkhangelsk region	Severnaya Dvina, Mesen and Pechora rivers	rivers basis fish	Parasite	trematode	Results of the seventy year long study of a species composition of trematode parasites in basins of the Dvina river, Mesen' river and Pechyora river are summed up. During this time the 50 trematode species were recorded in the first basin, 30 species - in the second basin and 36 species - in the third basin. The total number of trematode species recorded in the examined region is 56 species.
1034	Results of the study of species composition of fish parasites in river basins of the north-east European Russia. Protozoans	1997	Паразитология	Russia	Arkhangelsk region	Severnaya Dvina, Mesen and Pechora rivers	rivers basis fish	Parasite	Protozoans	Results of the seventy year long study of a species composition of fishes' parasites in basins of the Dvina river, Mesen' river and Pechyora river are summed up. During this time the 57 ichtioparasitic protozoan species have been recorded in the first basin, 21 species - in the second basin and 31 species - in the third basin. The total species number of ichtioparasitic protozoans of fishes in th…
1035	Results of the study of species composition of fish parasites in river basins of the north-east European Russia. Hirudinea, Mollusca, Crustacea, Arachnida	2000	Паразитология	Russia	Arkhangelsk region	Severnaya Dvina, Mesen and Pechora rivers	rivers basis fish	Parasite	Hirudinea, Mollusca, Crustacea, Arachnida	The report contains the results of faunistic study of parasitic Hirudinea, Mollusca, Crustacea and Arachnida occurring on fishes in the region of the S. Dvina, Mezen' and Pechyora river basins. The parasite fauna in the first basin is represented by 3 species of leechs, 4 species of molluscs, 13 species of crustaceous and 1 species of water mites, in the second basin — 4, 1, 11, 0; in the third b…
1036	Results of the study of species composition of fish parasites in river basins of the north-east European Russia. Nematoda, Acanthocephala	1999	Паразитология	Russia	Arkhangelsk region	Severnaya Dvina, Mesen and Pechora rivers	rivers basis fish	Parasite	Nematoda, Acanthocephala	The paper displays the results of faunistic study of nematodes and proboscis worms, parasites of fishes, in basins of the Dvina river, Mesen river and Pechora river. 18 nematode species and 7 proboscis worm species were recorded in the first basin, 11 and 7 species in the second basin, 8 and 4 species in the third basin. Total number of parasite species in the region examined: 21 nematode species…
1037	Results of the study of species composition of fish parasites in river basins of the north-east European Russia. Monogenea	1997	Паразитология	Russia	Arkhangelsk region	Severnaya Dvina, Mesen and Pechora rivers	rivers basis fish	Parasite	Monogenea	Results of the seventy year long study of a species composition of fishes' parasites in basins of the Dvina river, Mesen' river and Pechyora river are summed up. During this time the 68 monogenean species were recorded in the first basin, 44 species - in the second basin and 45 species - in the third basin. The total number of monogenean species recorded in the examined region is 86 species.
1038	Infestation of the Pacific cod Gadus macrocephalus by the parasitic copepod Haemobaphes diceraus (Copepoda: Pennellidae) at the eastern coast of the northern Kuril Islands and Southeast Kamchatka	2010	Биология Моря	Russia	Northern Kuril Islands and Southeast Kamchatka		Pacific cod	Parasite	Haemobaphes diceraus	Material was collected in 1997–1999, 2002, and 2006 at the eastern coast of the northern Kuril Islands and at the southeastern extremity of Kamchatka. The prevalence of infection by the parasitic copepod Haemobaphes diceraus in the cod Gadus macrocephalus during the study period averaged 22.2%. The intensity of H. diceraus infection was up to 6 indiv./fish, and it increased with decrease in the a…
1039	Contamination of fishes by cestodes family Triaenophoridae Loennberg, 1889 in water reservoirs of Yakutia	2009	Российский Паразитологический Журнал	Russia	Yakutia		fish	Parasite	Trienophorus spp	Contamination of 17 species of fishes of large reservoirs of Yakutia by Trienophorus spp. is investigated. Fishes are infected by Trienophorus nodulosus and T. crassus. Extensiveness of infection with T. nodulosus has made 22,3–41,8 % at intensity of infection 12,8±1,1–23,4±0,3 sp. and T. crassus – 4,9–93,3 % and 7,1±0,5–14,4±2,7 sp. respectively.
1040	Differentiation of trophic niches among nosed charr (salvelinus schmidti) in the lake Kronotskoye (Kamchatka) according to parasitological data	2015	Исследования Водных Биологических Ресурсов Камчатки И Северо-Западной Части Тихого Океана	Russia	Kamchatka		Nosed charrs	Parasite	gammaridtransmitted parasites (Cystidicola farionis, Cyathocephalus truncatus, Crepidostomum metoecus); Phyllodistomum umblae and Proteocephalus longicollis	Two ecological groups of benthivorous Nosed charrs are demonstrated for the Lake Kronotskoye on the content of stomachs and fauna of parasites. One group feeds on gammarids only and typically bears plenty of gammaridtransmitted parasites (Cystidicola farionis, Cyathocephalus truncatus, Crepidostomum metoecus). The other group feeds on different sedentary invertebrates and insect larvae, and has m…
1041	On the formation and zoogeography of cestode fauna in fishes inhabiting lakes of Karelia	2008	Труды Карельского Научного Центра Российской Академии Наук	Russia	Karelia		Lake fish	Parasite	cestodes	Zoogeographic analysis of cestodes in fishes from lakes of Karelia was carried out. It is demonstrated that cestodes in fishes living in Karelia belong to 5 faunal complexes and 1 (brackish-water) group. The core of the cestode fauna in fishes of Karelia is constituted by 2 faunal complexes – arctic and boreal-flatland ones. The species diversity of cestodes decreases from south to north, with a …
1042	Possible reasons for the degradation of salvelinus malma walb. (salmonidae) parasite fauna in the Falshivaya river, Kamchatka	2017	Паразитология	Russia	Kamchatka, Fal’shivaya River		Charr	Parasite	Myxidium salvelini, Cucullanus truttae	Parasite fauna of the charr Salvelinus malma isolated in the Fal’shivaya River headwaters (Kamchatka) was studied. Only two species of freshwater parasites were found: Myxi- dium salvelini Konovalov et Schulman, 1966 and Cucullanus truttae (Fabricius, 1794). Some reasons of the decrease of parasite fauna diversity were discussed. The phenomenon is related to the shift of charrs anadromy to the re…
1043	Species composition and seasonal dynamics of the helminthofauna of the bullroat (myoxocephalus scorpius, cottidae) from Kola Bay of the Barents sea	2012	Зоологический Журнал	Russia	Murmansk region, Kola Bay of the Barents sea		bullroat, Myoxocephalus Scorpius	Parasite	Bothriocephalus scorpii, Podocotyle atomon, Hysterithylacium gadi aduncum, Pseudoterranova decipiens, Echinorynchus gadi, and Anisakis sp	The species composition of the Myoxocephalus Scorpius helminthofauna was studied. The helminthofauna of the bullroat is rich and represented by 18 species (8 nematodes, 5 trematodes, 3 cestodes, and 2 acanthocephales). Mass species of parasites in the fish species investigated were determined. Among them, Bothriocephalus scorpii, Podocotyle atomon, Hysterothylacium gadi aduncum, Pseudoterranova d…
1044	Analysis of luminescent intestinal microflora of fish in cold seas: the White, Bering and Okhotsk seas	2015	Труды Вниро	Russia	White, Bering and Okhotsk seas		Cold sea fish	Bacteria	Psychrophilic luminescent bacteria, Aliivibrio Logei, Photobacterium Phosphoreum, A. salmonicida	The present study investigates the species composition of luminescent bacteria that live in the intestinal tract of fish in cold sea waters in summer and winter. Samples were collected during two expeditions - winter 2010 and summer 2014 - in order to study the possibility of seasonal changes in the composition of intestinal mic- roflora or free-living pelagic flora. To conduct the search of fluo…
1045	Peculiarities of the parasitofauna of Atlantic salmon parr (salmo salar l.), brown trout (salmo truttae l.), and char (salvelinus alpinus l.) in the Utsjoki river system (northern Finland)	2011	Паразитология	Finland	Nothern Finland		Atlantic salmon, brown trout and charr	Parasite	Infusorians Capriniana piscium, myxosporidia Chloromyxum januaricus and Myxobolus neurobius, metacercaria of the genera Diplostomum and Apatemon, and the nematode Raphidascaris acus larvae, protozoan parasites	Data on the parasite diversity in Salmonidae fish parr from different parts of the Utsjoki River obtained during 1993-1995 and 2006-2007 are presented. Three fish species, Salmo salar L., S. truttae L., and Salvelinus alpinus L., were examined on the presence of helminthes. Twenty species of salmon parasites were found, the majority of which are the parasites with complicated life cycles. Infusor…
1046	Peculiarities of the biology and parasite fauna of juvenile Atlantic salmon (salmo salar l.) in the Pista river (White Sea basin), according to the gyrodactylus salaris infestation	2012	Паразитология	Russia	White sea basin, Karelia Pista River system		Salmon (juvenile)	Parasite	Gyrodactylus Salaris	Juvenile salmon Salmo salar m. sebago Girard from the Pista River system (the White Sea Basin) was investigated. The data on species composition and occurrence peculiarities of Gyrodactylus salaris Malmberg, 1957 are given. This monogenean is the alien species for the river system and it is recorded for the first time. It is shown that the distribution of the parasite abundance is can be describe…
1047	Epizootic state of fishery reservoirs in Russia	2014	Вестник Казанского Государственного Энергетического Университета	Russia	Russia total/random regions incl. Far East		fish	Parasite		The article deals with the problems of Fish industry, which is the most quickly growing sector of the food industry in the world. At the last period in the world practice the leading value is given to an aquaculture method. Working efficiency to a certain extent in fishery industry depends on their epizootic state. Losses from the fish death caused by parasites are very considerable. It is necess…
1049	Diseases of Oncorhynchus genus salmonids in northern part of the sea of Okhotsk	2008	Международный Вестник Ветеринарии	Russia	Magadan region	Okhotsk sea plus 12 rivers	18 types incl salmon, cod	Multiple	Anisakidae and Diphyllobothriidae, Aeromonos hydrophila	A review of infectious and parasitical diseases of Oncorhynchus genus salmonids was carried out in northern part of the sea of Okhotsk. Aeromonos hydrophila strain were isolated as result of bacteriological analysis of a fertilized spawn and young salmoninds on all developmental stages. The data on a longstanding parasitological monitoring of infestation of migratory salmonids with Anisakidae and…

## Sheet: Birds_Eng
Article ID	Title	Year of Publication	Journal	Country	Region/ Province	City/ Town	Season (sampling)	Animal(s)	Multiple species	Arcticity; 1: Arctic (resident) 2: Arctic (breeding only in the Arctic or sub-Arctic) 3: Partly Arctic (breeds also in the Arctic or sub-Arctic) 4: Non Arctic (the Arctic, or not even the sub-Arctic, is not typical breeding ground of the species)	Infectious Agent Group (i.e. Bacteria, parasite, virus)	Infection(s)	Multiple infections	Is this a zoonotic infection?	Objective of article	Main results	Arctic* or not
509	North Atlantic migratory bird flyways provide routes for intercontinental movement of avian influenza viruses	2014	PLoS ONE	Iceland	Southwest and west		May-Sep 2010 and Oct-Nov 2011	Multiple	Wild gulls (Charadriiformes), waterfowl (Anseriformes) and shorebirds of various species in southwest and west Iceland	Both 1, 2 and 3.	Virus	AIV		Yes	To study how AIV moves across Pacidic or Atlantic Oceans	Found viruses of American, Eurasian, and mixed lineage	Arctic
510	Evidence that life history characteristics of wild birds influence infection and exposure to influenza A viruses	2013	PLoS ONE	United States	Alaska	Yukon-Kuskokwim Delta		Geese	4 species - Emperor goose (Chen canagica), Greater white-fronted goose (Anser albifrons), Cackling goose (Branta hutchinsii), and Black brant (Branta bernicla)	All species: 2.	Virus	AIV		Yes	To assess prevalence of AIV at different times	Percent of birds shedding the virus varies annually, >95% in emperor geese, 40-60% for other species	Arctic
511	Avian influenza virus surveillance in High Arctic breeding geese, Greenland	2018	Avian Diseases	Greenland				Geese	High Arctic breeding geese: Pink footed geese and barncle geese	Both species: 2.	Virus	AIV		Yes	To report on AIV in geese in Greenland during molting period	No AIV detected in fecal, feather, of water samples	Arctic
512	Prevalence and subtypes of influenza A viruses in wild waterfowl in Norway 2006-2007	2010	Acta Veterinaria Scandinavica	Norway	4 counties including northern		Aug-Dec	Multiple	Dabbling and diving ducks, gulls	All species: 3.	Virus	AIV	H5	Yes	To determine prevalence and subtypes of AIV in wild waterfowl	Highest prevalence (12.8%) in dabbling ducks, lower prevalence (4.1%) in diving ducks, LP H5 found in 17 dabbling ducks and 1 gull	Arctic
514	Avian influenza virus ecology in Iceland shorebirds: intercontinental reassortment and movement	2014	Infection, Genetics and Evolution	Iceland			May-Sep	Multiple	Shorebirds - Common Redshank (Tringa totanus), Common Ringed Plover (Charadrius hiaticula), Common Snipe (Gallinago gallinago), Dunlin (Calidris alpina), Eurasian Oystercatcher (Haematopus ostralegus), Purple Sandpiper (Calidris maritima), Red Knot (Calidris canuta), Ruddy Turnstone (Arenaria interpres), Sanderling (Calidris alba)	All species either 2 or 3.	Virus	AIV		Yes	To examine lineage of viruses in Icelandic birds	High serological evidence of AIV exposure (75%)	Arctic
515	Avian influenza ecology in North Atlantic sea ducks: Not all ducks are created equal	2015	PLoS ONE	Multiple	US, Canada, Greenland, Iceland		Summer, Spring	Ducks	North Atlantic Sea Ducks - blackscoter (Melanitta nigra), surf scoter (Melanittaperspicillata),white-wingedscoter(Melanittafusca), long-tailed duck(Clangula hyemalis), commoneider (Somateria mollissima), and king eider (Somateriaspectabilis)	All species either 2 or 3.	Virus	AIV		Yes	To examine presence of AIV in North Atlantic Sea Ducks	High serological prevalence (61%), but low virus prevalence (0.3%)	Arctic
517	Cross-seasonal patterns of avian influenza virus in breeding and wintering migratory birds: a flyway perspective	2012	Vector-Borne and Zoonitic Diseases	United States	Alaska and California		Aug-Sep	Multiple	Dabbling ducks, Northern Pintail (Anas acuta), Mallards (Anas platyrhynchos) and many others	All species either 2 or 3.	Virus	AIV		Yes	To compare AIV prevalence at wintering and breeding locations	Northern shoverer had highest prevalence at both breeding (32.3%) and wintering (5.2%) locations	Arctic
518	Reconstructing an annual cycle of interaction: Natural infection and antibody dynamics to avian influenza along a migratory flyway	2011	Oikos	Norway	Svalbard			Goose	Pink-footed goose Anser brachyrhynchus	2.	Virus	AIV		Yes	To investigate changes in AIV antibodies over time	In spring, 63% of adults had detectable AIV antibodies compared to 15% of juveniles, adult seroprevalence decreased by 30% from spring to late summer	Arctic
520	Perpetuation and reassortment of gull influenza A viruses in Atlantic North America	2014	Virology	Canada	Newfoundland		May-Dec	Gulls	American Herring Gull (Larus smithsonianus), Great Blackbacked Gull, Ring-billed Gull (Larus delawarensis), Black-headed Gull, Glaucous Gull (Larus hyperboreus, Iceland Gull (Larus glaucoides), Mew Gull (Larus canus)	All species either 2 or 3.	Virus	AIV		Yes	To examine AIV prevalence in gulls	Overall prevalence was low (30/1645, 1.8%), but high seroprevalence (50%)	Arctic
521	A 4-year study of avian influenza virus prevalence and subtype diversity in ducks of Newfoundland, Canada	2013	Canadian Journal of Microbiology	Canada	Newfoundland	St. John's region	Sep 2008 - Feb 2012	Ducks	American Black Duck, Mallards (Anas platyrhynchos), Northern Pintail	All species: 3.	Virus	AIV		Yes	To examine the prevalence and subtypes of AIV in ducks	Overall prevalence was 7.2%, juveniles had a higher prevalence, and prevalence rates were higher in the autumn, serology showed previous AIV infecftion 20/38 (52.6%)	Arctic
523	Prevalence of Influenza A viruses in wild migratory birds in Alaska: Patterns of variation in detection at a crossroads of intercontinental flyways	2008	Virology Journal	United States	Alaska			Multiple	97 species, ducks, seabirds, shorebirds, gulls, terns, swans, etc	All the species at least bred in the Arctic.	Virus	LPAI		Yes	To investigate the prevalence of AIV in wild migratory birds	LPAI detected in 1.7%, but no HPAI was detected	Arctic
530	Prevalence and diversity of avian influenza viruses in environmental reservoirs	2008	Journal of General Virology	United States	Alaska	Fairbanks	NS	Ducks	migratory waterfowl	2-3.	Virus	AIV		Yes	To explore prevalence of AIV in pond sediments used by waterfowl	Viruses were detectable and results suggest this as another method for assessing prevalence and diversity of viruses in environment	Arctic
537	Orthomyxo-, paramyxo- and flavivirus infections in wild waterfowl in Finland	2008	Virology Journal	Finland	several provinces including Arctic		8 week period starting Aug 20, 2006	Multiple	Wild - mallard, common teal, bean goose, northern pintail, common pochard	3.	Virus	AIV	Also paramyxo-, flavi-, and alphaviruses	Yes	To investigate viral pathogens in wild waterfowl	AIV RNA found in 13 swabs, prevalence in wild waterfowl was 11.3%, other viral prevalences also reported	Arctic
538	Detection, prevalence, and transmission of avian hematozoa in waterfowl at the Arctic/sub-Arctic interface: co-infections, viral interactions, and sources of variation	2016	Parasites & Vectors	United States	Alaska		May-Aug	Ducks	ducks of five species	3.	Multiple	AIV	Also parasites	Yes	To investigate co-infection of AIV and parasites in waterfowl	Present prevalence estimates of co-infections	Arctic
539	Precursor genes of future pandemic influenza viruses are perpetuated in ducks nesting in Siberia	2000	Archives of Virology	Russia	Siberia	several provinces including Arctic	Autumn (Aug, Sep, Oct)	Multiple	Ducks, gulls, Goose, Shorebirds, Swans	3.	Virus	AIV		Yes	To investigate the subtypes of AIV in birds migrating from Siberia to Japan	Results include number of positive fecal samples	Arctic
541	Wild bird influenza survey, Canada, 2005	2008	Emerging Infectious Diseases	Canada	British Columbia, Alberta, Manitoba, Ontario, Quebec, New Brunswick, Nova Scotia, Prince Ewdard Island, Newfoundland, and Laborador		NS	Ducks	Mallard ducks (Anas platyrhynchos) and other duck species	3, obviously. The time of the year unclear.	Virus	AIV		Yes	To evaulate AIV prevalence in Canadan ducks	37% of ducks were M1 positive, 5% were H5 positive, no positive samples for H7	Arctic
543	Canada's inter-agency wild bird influenza survey.	2009	Integrative Zoology	Canada	British Columbia, Ontario, Quebec, Prince Edward Island, Saskatchewan, Newfoundland and Laborador		Aug-Sep	Ducks	Wild	2-3.	Virus	AIV		Yes	To survey and detect HPAIV in wild waterfowl	30% of ducks positive for AIV, 5% of other species, all of North American lineage with LPAIV	Arctic
545	Survey of influenza a viruses circulating in wild birds in Canada 2005 to 2007	2010	Avian Diseases	Canada	British Columbia, Alberta, Ontario, Quebec, the Atlantic provinces, and the eastern Arctic		Live bird: during annual waterfowl banding operations	Ducks	Mallards (Anas platyrhynchos) were the primary target species; however, other dabbling duck species as well as diving and perching ducks (Family: Anatidae), were also included	3.	Virus	AIV		Yes	To explore the prevalence of AIV in wild ducks	Prevalence ranges by species, region, and year, but generally ranged from 20-50%	Arctic
548	Evidence for limited exchange of avian influenza viruses between seaducks and dabbling ducks at Alaska Peninsula coastal lagoons	2011	Archives of Virology	United States	AlaskaIzembek and Nelson Lagoons		Aug-Sep	Multiple	Steller’s eiders (seaducks) and northern pintails (dabbling ducks)	Steller's eider: 1-2; pintail: 3.	Virus	AIV		Yes	To assess the role of Steller's eiders in transporting AIV genes between continents and to determine viral resevoir in nothern pintails	AIV prevalnce was 0.2% at Izembek Lagoon and 3.9% and Nelson Lagoon	Arctic
549	Surveillance for Eurasian-origin and intercontinental reassortant highly pathogenic influenza A viruses in Alaska, spring and summer 2015	2016	Virology Journal	United States	Alaska	Yukon-Kuskokwim Delta		Geese	Cackling geese (Branta hutchinsii)	2.	Virus	AIV	HPIAV	Yes	To investigate the HPAIV in North American waterfowl	No HP IAV detects (0/1129), prevalence of LPAIV was in accordance with previous studies, low prevalven in geese in spring, non detection in summer	Arctic
550	Sampling of sea ducks for influenza A viruses in Alaska during winter provides lack of evidence for epidemiologic peak of infection	2015	Journal of Wildlife Diseases	United States	Alaska			Ducks	Sea ducks - Harlequin Duck (Histrionicus histrionicus), King Eider (Somateria spectabilis), Long-tailed Duck (Clangula hyemalis), White-winged Scoter (Melanitta deglandi), Prince William Sound Barrow’s Goldeneye (Bucephala islandica), Black Scoter (Melanitta americana), Surf Scoter (Melanitta perspicillata)	2.	Virus	AIV		Yes	To sample sea ducks for AIV		Arctic
552	Influenza A virus recovery, diversity, and intercontinental exchange: A multi-year assessment of wild bird sampling at izembek national wildlife refuge, Alaska	2018	PLoS ONE	United States	Alaska	Izembek National Wildlife Refuge, western Alaska	Late summer, autumn	Multiple	25 species of wild migratory waterfowl and other aquatic birds, geese, black brant etc.	2-3.	Virus	AIV		Yes	To evaluate which species were consitently infected, describe subtypes, explore intercontinental exchange	Dabbling ducks, emperor geese, and glaucous-winged gulls consisently were infected	Arctic
553	Using RRT-PCR analysis and virus isolation to determine the prevalence of avian influenza virus infections in ducks at Minto Flats State Game Refuge, Alaska, during August 2005	2007	Archives of Virology	United States	Alaska	Minto Flats Game Refuge	Aug 8-21	Ducks	Nothern pintail, mallard, green wing teal, wigdeon	3.	Virus	AIV		Yes	To describe surveillance for AIV in waterfowl at the Minto Flats State Game Refuge	25.6% of all samples were AIV positive (500 samples)	Arctic
554	The dynamics of avian influenza in Lesser Snow Geese: Implications for annual and migratory infection patterns	2015	Ecological Applications	Multiple	Russia, Canada	Banks Island, Northwest Territories, Canada and Wrangel Island, Russia		Geese	Lesser Snow Geese	2.	Virus	AIV		Yes	To investigate the epizoology of AIV in migratory populations of lesser snow geese	Seroprevalence and annual seroconversion varied by year, results provide evidence for high seroprevalence	Arctic
563	Evaluation of seabirds in Newfoundland and Labrador, Canada, as hosts of influenza A viruses	2013	Journal of Wildlife Diseases	Canada	Newfoundland and Laborador		May 2008 to Dec 2011	Multiple	Breeding & locally wintering 13 seabird species, Common Murres, Thick-billed Murres, Atlantic Puffins, Razorbill, Leach’s Storm-Petrel, Black-legged Kittiwake etc., Procellariformes and Phaethontiformes, some families of the Charadriiformes (Alcidae, Stercoraridae, and Sternidae), and the family Sulidae of the Pelicaniformes. For the purposes of this article we also include Kittiwakes (Rissa spp.…	2-3.	Virus	AIV		Yes	To examine AIV prevalence in less researched seabird hosts	Thick-billed and Common murres had high antibody prevalnce (44%), Atlantic puffins had 22% antibody prevalence, no AIV found in several species	Arctic
565	Reassortment of American and Eurasian genes in an influenza A virus isolated from a great black-backed gull (Larus marinus), a species demonstrated to move between these regions	2011	Archives of Virology	Canada	Newfoundland		Jun 2008 - Mar 2009	Gulls	Great Black-backed Gull (Larus marinus)	2-3.	Virus	AIV		Yes	To examine the Great-backed Gull for AIV	2/38 tested positive for AIV, other samples died from Aspergillosis	Arctic
567	High seroprevalence of antibodies to avian influenza viruses among wild waterfowl in Alaska: Implications for surveillance	2013	PLoS ONE	United States	Alaska		Jun-Sep	Multiple	11 species of wild waterfowl - tundra swans (Cygnus columbianus), cackling geese (Branta hutchinsii), Pacific black brant (B. bernicla nigricans), greater whitefronted geese (Anser albifrons), emperor geese (Chen canagica), northern pintails (Anas acuta), Pacific common eiders (Somateria mollissima v-nigrum), spectacled eiders (S. fischeri), Steller’s eiders (Polysticta stelleri), long-tailed duc…	2-3.	Virus	AIV		Yes	To explore seroprevalence of AIV in wild Alaskan waterfowl	Seroprevalence was highest in eiers and emperor geese, suggests that opoulations with high seroprevlences should be included in surveillance, along with high infection rate species	Arctic
568	The Asia-to-America influx of avian influenza wild bird hosts is large	2009	Avian Diseases	United States	Alaska			Multiple	33 species of waterfowl (Anatidae), 46 species of shorebirds (Charadriidae and Scolopacidae), and 15 species of gulls and terns (Laridae)	2-3.	Virus	AIV		Yes	To explain how there may be more AI- infectious birds than typically considered	Data of more bird species can be incorporated into models	Arctic
569	No evidence that migratory geese disperse avian influenza viruses from breeding to wintering ground	2017	PLoS ONE	Multiple	Netherlands, Hungary, Russia	Kolguev Island (Russia)	All year. Samples from wintering grounds were mainly taken in the Netherlands and Hungary, Samples from breeding grounds were mainly from the Kolguev Island, Russia	Geese	Bean goose (Anser fabalis), Barnacle goose (Branta leucopsis), Greater white-fronted goose (Anser albifrons)	2-3.	Virus	AIV	LPAI	Yes	To determine if geese with infected with LPAIV outside of wintering grounds	Results suggest that geese were not infected proir to arrival on wintering grounds	Arctic

## Sheet: Birds_Rus
Article ID	Title	Year of Publication	Journal	Country	Region/ Province	Animal(s)	Multiple animals:	Infectious Agent Group (i.e. Bacteria, parasite, virus)	Infection(s)	Multiple infections	Main results	Notes
1101	Results serological monitoring for avian influenza type А population of shorebirds, gulls western Taimyr	2011	Международный Вестник Ветеринарии	Russia	Far North, Western Taimyr	Shorebirds, Gulls		Virus	Avian influenza		The results of studies cloacal swabs and blood serum samples from 169 individuals of 4 species belonging to the families Stercorariidae and Laridae. The specific antibodies to certain subtypes of influenza A and influenza A virus, which confirms the possibility of circulation of the pathogen in the region and the need to continue monitoring studies.
1103	Genetic typing of avian influenza in the Far East	2010	Вестник Новосибирского Государственного Университета. Серия: Биология, Клиническая Медицина	Russia	Kamchatka region, Amursky region, Astrahansky region and Hokkaido island			Virus	Avian influenza	H13N6, H10N6	In the Far East in the 2008 from birds of 127 spices and 32 families were collected 4 248 samples and 16 influenza viruses were isolated and analyzed. The hemagglutinin genes of stains A/Larus/Kamchatka/521/08 (H13N6) isolated in Kamchatka region and A/Teal/Tinda/6114/08 (H10N6) isolated in Amursky region were analyzed genetically. The analysis shows homology with the strains which were isolated …
1104	Results of influenza virus surveillance in wild birds in Krasnoyarsk territory (2008)	2010	Сибирский Вестник Сельскохозяйственной Науки	Russia	Krasnoyarsk region	Wild birds (Anseriformes)		Virus	Avian influenza	H3n6, H3n8, H10n7	The results of virological investigation of wild birds belonging to 13 orders and inhabiting Krasnoyarsk region are presented. Four influenza A viruses of H10N7, H3N6 and H3N8 subtypes were isolated from the birds belonging to Anseriformes order. H5N1 influenza virus was not identified. It was approved that Krasnoyarsk region is one of the most important territories concerning influenza virus epi…
1107	Prospects for the distribution of avian influenza in the territory of northwestern Siberia	2007	Научный Вестник Ямало-Ненецкого Автономного Округа	Russia	Northwestern Siberia	Multiple types of birds		Virus	Avian influenza		No English abstract
1108	Ecology of influenza a viruses, isolated from gulls of the Russian Far East	2012	Acta Biomedica Scientifica	Russia	Russian Far East	Gulls		Virus	Avian influenza	Influenza A	During this research huge surveillance study, the role of Gulls as the nature host of influenza A viruses was established. Oral and cloacal samples from Gulls were collected on the territory of the Russian Far East. Fourteen influenza A viruses were isolated.
1109	Predictive epizootic situation modeling using fuzzy sets	2016	Российский Журнал Проблемы Ветеринарной Санитарии, Гигиены И Экологии	Russia	Taimyr peninsula	Migratory birds		Virus	Avian influenza		According to the analysis of the factors contributing to the possible occurrence of outbreaks of influenza A in the territory of Taimyr, using the theory of fuzzy sets model predictive probability of epizootic it was built. The results show that the strongest (negative or positive) impact on the epizootic situation of influenza A in a particular area has the ease of migration routes (with respect…
1110	Epizootological monitoring of avian influenza A in Taimir in 2005-2007	2008	Сибирский Вестник Сельскохозяйственной Науки	Russia	Taimyr peninsula	39 species of wild birds		Virus	Avian influenza	Influenza A	There are set out the results of investigations on studying the influenza A virus circulation in populations of wild birds in Taimir. The influenza A virus has not been isolated in the examined samples taken from 39 species of wild birds; antibodies to several subtypes of the virus have occurred in blood serums and yolks.
1111	Epizootological monitoring of influenza A subtypes H5 and H7 among wild birds of the Taimyr peninsula	2012	Известия Санкт-Петербургского Государственного Аграрного Университета	Russia	Taimyr peninsula	Wild birds		Virus	Avian influenza	Influenza A (H5 and H7)	Epizootological monitoring influenza A Subtype H5 and H7 in wild birds of the Taimyr Peninsula Presented a study on the epizootic situation of influenza A in wild birds of the Taimyr. Peninsula found that, despite the absence of circulating influenza virus in birds tested, in serological studies revealed antihemagglutination antibody to all antigens used in the study of two subtypes of influenza …
1112	Using predictive modeling to study epizootic process zoonotic infections by the example of the Taimyr Peninsula	2016	Генетика И Разведение Животных	Russia	Taimyr peninsula	Wild birds		Multiple	Anthrax, Avian influenza	Anthrax, Avian influenza	Developed predictive models based on epidemiological analysis and the theory of fuzzy sets, assess the risks of the territory of the Taimyr Peninsula epizootic anthrax and influenza A predictive calculation results showed that at all favorable for the development of epizootic process, conditions in the territory of the risk of anthrax is 81.25%. The forecast outbreaks of influenza in the populati…
1113	Detection of avian influenza virus in wild birds of Russia in 2013	2014	Российский Ветеринарный Журнал. Мелкие Домашние И Дикие Животные	Russia	Vladimir, Arkhangelsk, Krasnoyarsk and Altay regions	Wild birds		Virus	Avian influenza	H5, H7	During surveillance of avian influenza in wild birds there were obtained 1406 field samples from 17 regions of 6 Federal districts of Russia in 2013. Avian influenza type A genomes were detected in Vladimir, Arkhangelsk, Krasnoyarsk and Altay regions, subtypes H5 and H7 were not identified. Probably these viruses belonged to other low pathogenic avian influenza virus subtypes. 458 serum samples w…
1114	Avian influenza in Yakutia: Problems, experience, diagnosis and prevention	2008	Якутский Медицинский Журнал	Russia	Yakutia	Migratory birds		Virus	Avian influenza	H5N1	No English abstract
1115	Administrative actions for the prevention of avian influenza in the republic of Sakha (Yakutia)	2006	Дальневосточный Журнал Инфекционной Патологии	Russia	Yakutia			Virus	Avian influenza		No English abstract
1116	Isolation of highly pathogenic influenza A (subtype H5N8) virus on the territory of Republic of Sakha (Yakutia)	2015	Дальневосточный Журнал Инфекционной Патологии	Russia	Yakutia	Wild migratory waterfowl bird (Anas penelope)		Virus	Avian influenza	H5N8	In this work, we investigated biological properties of influenza A (subtype H5N8) virus. The viral strain was isolated from a wild migratory waterfowl bird (Anas penelope) on the territory of Sakha Republic (Yakutia). The strain A/wigeon/Sakha/1/2014 (H5N8) is highly pathogenic to mammals and is similar to strains that caused outbreaks among wild and domestic birds on the territory of Southeaster…
