# Supplementary material for: Research on Selected Wildlife Infections in the Circumpolar Arctic—A Bibliometric Review
Source: MDPI journal article supplement (doi:10.3390/ijerph191811260), 2022-09-07
Supplement: s1 [file s1]

# Search Terms Used:

| ENGLISH WILDLIFE INFECTION SEARCHES |                                                                                                                                                                                                                                                                                                                                                                                                                                                                                                                                    |                                                                                                                                       |
|-------------------------------------|------------------------------------------------------------------------------------------------------------------------------------------------------------------------------------------------------------------------------------------------------------------------------------------------------------------------------------------------------------------------------------------------------------------------------------------------------------------------------------------------------------------------------------|---------------------------------------------------------------------------------------------------------------------------------------|
| FISH                                |                                                                                                                                                                                                                                                                                                                                                                                                                                                                                                                                    |                                                                                                                                       |
| PubMed                              | ((((arctic regions OR subarctic OR polar OR circumpolar OR alaska OR canada OR canadian arctic OR greenland OR iceland OR norway OR svalbard OR faroe islands OR sweden OR finland OR lapland OR scandinavia OR fennoscandia OR russia OR russian arctic OR siberia)) AND animal diseases) AND ("1990"[Date - Publication] : "3000"[Date - Publication])) AND (salmon OR salmonidae OR trout OR salmonids OR cod OR gadidae OR esocidae OR pikes OR cyprinidae OR minnow)) AND (anisakidae OR diphyllbothrium OR opisthorchis)     | 35                                                                                                                                    |
| Scopus                              | (salmon OR trout OR salmonidae) AND (anisakidae OR diphyllbothrium OR opisthorchis)                                                                                                                                                                                                                                                                                                                                                                                                                                                | 134                                                                                                                                   |
|                                     | (cod OR gadidae) AND (anisakidae OR diphyllbothrium OR opisthorchis)                                                                                                                                                                                                                                                                                                                                                                                                                                                               | 36                                                                                                                                    |
|                                     | (pike OR esocidae) AND (anisakidae OR diphyllbothrium OR opisthorchis)                                                                                                                                                                                                                                                                                                                                                                                                                                                             | 10                                                                                                                                    |
|                                     | (cyprinidae OR minnow) AND (anisakidae OR diphyllbothrium OR opisthorchis)                                                                                                                                                                                                                                                                                                                                                                                                                                                         | 22                                                                                                                                    |
|                                     |                                                                                                                                                                                                                                                                                                                                                                                                                                                                                                                                    | PubMed: 35<br>Scopus: 202<br>PubMed+Scopus = 237<br>Duplicates removed: 31<br><br>FISH TOTAL: 206<br>After 1 <sup>st</sup> review: 39 |
| BIRDS                               |                                                                                                                                                                                                                                                                                                                                                                                                                                                                                                                                    |                                                                                                                                       |
| PubMed                              | ((((((((arctic regions OR subarctic OR polar OR circumpolar OR alaska OR canada OR canadian arctic OR greenland OR iceland OR norway OR svalbard OR faroe islands OR sweden OR finland OR lapland OR scandinavia OR fennoscandia OR russia OR russian arctic OR siberia)) AND animal diseases) AND ("1990"[PDAT] : "3000"[PDAT])) AND (duck OR gull* OR goose OR grouse OR geese OR anser OR chen OR branta OR somateria OR polysticta OR clangula OR melanitta OR larus OR phasianidae) AND (avian influenza)) NOT chen[Author])) | 227                                                                                                                                   |
| Scopus                              | ("avian influenza") AND (gull OR goose OR geese OR grouse OR duck OR anser OR chen OR branta OR somateria OR polysticta OR clangula OR melanitta OR larus OR phasianidae) AND (canada OR alaska OR greenland OR iceland OR Norway OR Sweden OR finland OR Russia OR arctic) AND (pubyear > 1989)                                                                                                                                                                                                                                   | 165                                                                                                                                   |
|                                     |                                                                                                                                                                                                                                                                                                                                                                                                                                                                                                                                    | PubMed: 227<br>Scopus: 165<br>PubMed+Scopus = 392                                                                                     |

Search Terms Used:

|                |                                                                                                                                                                                                                                                                                                                                                                                                                                |                                                                                     |
|----------------|--------------------------------------------------------------------------------------------------------------------------------------------------------------------------------------------------------------------------------------------------------------------------------------------------------------------------------------------------------------------------------------------------------------------------------|-------------------------------------------------------------------------------------|
|                |                                                                                                                                                                                                                                                                                                                                                                                                                                | Duplicates removed: 115<br><br>BIRD TOTAL: 277<br>After 1 <sup>st</sup> review: 105 |
| <b>MAMMALS</b> |                                                                                                                                                                                                                                                                                                                                                                                                                                |                                                                                     |
| PubMed         | (arctic regions OR subarctic OR polar OR circumpolar OR alaska OR canada OR canadian arctic OR greenland OR iceland OR norway OR svalbard OR faroe islands OR sweden OR finland OR lapland OR scandinavia OR fennoscandia OR russia OR russian arctic OR siberia)) AND animal diseases) AND ("1990"[PDAT] : "3000"[PDAT])) AND (reindeer OR caribou OR rangifer tarandus)                                                      | 109                                                                                 |
|                | (arctic regions OR subarctic OR polar OR circumpolar OR alaska OR canada OR canadian arctic OR greenland OR iceland OR norway OR svalbard OR faroe islands OR sweden OR finland OR lapland OR scandinavia OR fennoscandia OR russia OR russian arctic OR siberia)) AND animal diseases) AND ("1990"[PDAT] : "3000"[PDAT])) AND (moose OR alces alces)                                                                          | 83                                                                                  |
|                | (arctic regions OR subarctic OR polar OR circumpolar OR alaska OR canada OR canadian arctic OR greenland OR iceland OR norway OR svalbard OR faroe islands OR sweden OR finland OR lapland OR scandinavia OR fennoscandia OR russia OR russian arctic OR siberia)) AND animal diseases) AND ("1990"[PDAT] : "3000"[PDAT])) AND (sled dog OR sledge dog)                                                                        | 21                                                                                  |
|                | (arctic regions OR subarctic OR polar OR circumpolar OR alaska OR canada OR canadian arctic OR greenland OR iceland OR norway OR svalbard OR faroe islands OR sweden OR finland OR lapland OR scandinavia OR fennoscandia OR russia OR russian arctic OR siberia)) AND animal diseases) AND ("1990"[PDAT] : "3000"[PDAT])) AND (brown bear OR ursus arctos OR black bear OR ursus americanus OR polar bear OR ursus maritimus) | 53                                                                                  |
|                | (arctic regions OR subarctic OR polar OR circumpolar OR alaska OR canada OR canadian arctic OR greenland OR iceland OR norway OR svalbard OR faroe islands OR sweden OR finland OR lapland OR scandinavia OR fennoscandia OR russia OR russian arctic OR siberia)) AND animal diseases) AND ("1990"[PDAT] : "3000"[PDAT])) AND (arctic fox or vulpes lagopus)                                                                  | 44                                                                                  |
|                | (arctic regions OR subarctic OR polar OR circumpolar OR alaska OR canada OR canadian arctic OR greenland OR iceland OR norway OR svalbard OR faroe islands OR sweden OR finland OR lapland OR scandinavia OR fennoscandia OR russia OR russian arctic OR siberia)) AND animal diseases) AND ("1990"[PDAT] : "3000"[PDAT])) AND (wolf or canis lupus)                                                                           | 40                                                                                  |

## Search Terms Used:

|        |                                                                                                                                                                                                                                                                                                                                                                                                                                                                                                                                                                                                                                                                |                                                                                                                                                                             |
|--------|----------------------------------------------------------------------------------------------------------------------------------------------------------------------------------------------------------------------------------------------------------------------------------------------------------------------------------------------------------------------------------------------------------------------------------------------------------------------------------------------------------------------------------------------------------------------------------------------------------------------------------------------------------------|-----------------------------------------------------------------------------------------------------------------------------------------------------------------------------|
|        | (arctic regions OR subarctic OR polar OR circumpolar OR alaska OR canada OR canadian arctic OR greenland OR iceland OR norway OR svalbard OR faroe islands OR sweden OR finland OR lapland OR scandinavia OR fennoscandia OR russia OR russian arctic OR siberia)) AND animal diseases) AND ("1990"[PDAT] : "3000"[PDAT])) AND (hare OR lepus)                                                                                                                                                                                                                                                                                                                 | 71                                                                                                                                                                          |
|        | (arctic regions OR subarctic OR polar OR circumpolar OR alaska OR canada OR canadian arctic OR greenland OR iceland OR norway OR svalbard OR faroe islands OR sweden OR finland OR lapland OR scandinavia OR fennoscandia OR russia OR russian arctic OR siberia)) AND animal diseases) AND ("1990"[PDAT] : "3000"[PDAT])) AND (red fox OR vulpes vulpes)                                                                                                                                                                                                                                                                                                      | 49                                                                                                                                                                          |
|        |                                                                                                                                                                                                                                                                                                                                                                                                                                                                                                                                                                                                                                                                | PubMed Total: 458<br>Duplicates removed: 93<br>Total after duplicates removed: 365                                                                                          |
| Scopus | ( TITLE-ABS-KEY ( ( reindeer OR caribou OR "rangifer tarandus" ) OR ( moose OR "alces alces" ) OR ( "sled dog" OR "sledge dog" ) OR ( "polar bear" OR "brown bear" OR "black bear" OR "ursus arctos" OR "ursus maritimus" OR "ursus americanus" ) ) OR TITLE-ABS-KEY ( ( "arctic fox" OR "vulpes lagopus" OR "red fox" OR "vulpes vulpes" ) OR ( wolf OR "canis lupus" ) OR ( hare OR lepus ) ) AND TITLE-ABS-KEY ( ( arctic OR canada OR alaska OR greenland OR iceland OR "faroe islands" OR svalbard OR norway OR sweden OR finland OR lapland OR russia OR scandinavia OR fennoscandia OR siberia ) ) AND TITLE-ABS-KEY ( infection ) ) AND PUBYEAR > 1989 | 452                                                                                                                                                                         |
|        |                                                                                                                                                                                                                                                                                                                                                                                                                                                                                                                                                                                                                                                                | PubMed: 458<br>Scopus: 452<br>Scopus + PubMed= 910<br>Duplicates removed: 125<br>Total after duplicates removed: 785<br><br>Total: 785<br>After 1 <sup>st</sup> review: 376 |
|        |                                                                                                                                                                                                                                                                                                                                                                                                                                                                                                                                                                                                                                                                | <b>FISH + BIRDS + MAMMALS= 1551</b><br><b>After 1<sup>st</sup> review: 520</b>                                                                                              |

## SEARCH WORDS IN ELIBRARY.RU (IN RUSSIAN)

Total amount of library items to search from: 28 498 899 (by 21.01.2019)

Limited to publication types: academic articles, books, dissertations

Years: -

Additional parameters: search in publications with full-text available for the user; search taking morphology into account (analogous word forms)

## Search Terms Used:

### **BIRDS:**

| Search term in Russian                                                   | Matches    | Search term translated to English                                                            |
|--------------------------------------------------------------------------|------------|----------------------------------------------------------------------------------------------|
| Птичий грипп                                                             | 122        | Avian influenza                                                                              |
| Грипп птиц                                                               | 295        | Avian influenza                                                                              |
| <b>BIRDS TOTAL matches</b>                                               | <b>417</b> |                                                                                              |
| Selected for initial full-text analysis                                  | 3<br>28    | in Bird Parasites, 2001 – 2017<br>in Bird Infection/virus, 2005 – 2018                       |
| Included in the Article Table (excel) after brief abstract-text analysis | 17<br>8    | in arctic regions<br>in Russia total/random regions (might be still relevant)<br>2001 - 2018 |

### **FISH:**

| Search term in Russian                                                   | Matches    | Search term translated to English                                                            |
|--------------------------------------------------------------------------|------------|----------------------------------------------------------------------------------------------|
| Вирусные болезни рыб                                                     | 15         | Viral diseases fish                                                                          |
| Инфекционные болезни рыб                                                 | 32         | Infectious diseases fish                                                                     |
| Бактериальные болезни рыб                                                | 23         | Bacterial diseases fish                                                                      |
| Паразиты рыб                                                             | 419        | Fish parasites                                                                               |
| Инфекции рыб                                                             | 62         | Fish infections                                                                              |
| Гельминтозы рыб                                                          | 9          | Fish helminths                                                                               |
| Инвазии рыб                                                              | 162        | Fish invasions                                                                               |
| Лосось паразиты                                                          | 25         | Salmon parasites                                                                             |
| Лосось инфекции                                                          | 3          | Salmon infections                                                                            |
| Форель паразиты                                                          | 2          | Trout parasites                                                                              |
| Форель инфекции                                                          | 1          | Trout infections                                                                             |
| Щука паразиты                                                            | 28         | Pike parasites                                                                               |
| Щука инфекции                                                            | 0          | Pike infections                                                                              |
| Треска паразиты                                                          | 6          | Cod parasites                                                                                |
| Треска инфекции                                                          | 1          | Cond infections                                                                              |
| Горбуша паразиты                                                         | 4          | Humpback salmon parasites                                                                    |
| Горбуша инфекции                                                         | 0          | Humpback salmon infections                                                                   |
| Карповые паразиты                                                        | 24         | Carp parasites                                                                               |
| Карповые инфекции                                                        | 4          | Carp infections                                                                              |
| <b>FISH TOTAL matches</b>                                                | <b>820</b> |                                                                                              |
| Selected for initial full-text analysis                                  | 48<br>5    | in Fish Parasites, 1997-2018<br>in Fish Infections, 2010 – 2018                              |
| Included in the Article Table (excel) after brief abstract-text analysis | 47<br>2    | in arctic regions<br>in Russia total/random regions (might be still relevant)<br>1997 - 2018 |

### **MAMMALS:**

| Search term in Russian             | Matches | Search term translated to English |
|------------------------------------|---------|-----------------------------------|
| Инфекционные болезни животных      | 505     | Infectious diseases animals       |
| Инфекции животных                  | 1190    | Infections animals                |
| plus Арктика                       | 3       | plus Arctic                       |
| or plus                            | 36      | plus northern                     |
| Инфекционные болезни млекопитающих | 19      | Infectious diseases mammals       |
| Инфекции млекопитающих             | 105     | Infections mammals                |
| Инвазивные болезни животных        | 0       | Invasive diseases animals         |
| Инвазии животных                   | 485     | Invasions animals                 |
| Инвазивные болезни млекопитающих   | 0       | Invasive diseases mammals         |

## Search Terms Used:

|                                                                          |             |                                                                                              |
|--------------------------------------------------------------------------|-------------|----------------------------------------------------------------------------------------------|
| Инвазии млекопитающих                                                    | 38          | Invasions mammals                                                                            |
| Болезни морских млекопитающих                                            | 7           | Diseases marine mammals                                                                      |
| <b>MAMMALS TOTAL matches</b>                                             | <b>2388</b> |                                                                                              |
| Selected for initial full-text analysis                                  | 88          | 1997-2018                                                                                    |
| Included in the Article Table (excel) after brief abstract-text analysis | 71<br>14    | in arctic regions<br>in Russia total/random regions (might be still relevant)<br>2007 - 2018 |

## Some additional search information by infection

| Key words                 | Mam<br>mals | Animal<br>s | Bea<br>r | Reindee<br>r | Fo<br>x | Har<br>e | Wol<br>f | Sle<br>d<br>dog | Mat<br>c<br>hes | Selecte<br>d for<br>full-text<br>analysi<br>s | Items<br>selected<br>, years<br>range |
|---------------------------|-------------|-------------|----------|--------------|---------|----------|----------|-----------------|-----------------|-----------------------------------------------|---------------------------------------|
| Trichinella<br>Трихинелла | 19          | 43          | 10       | -            | 3       | -        | 10       | 11              | 115             | 24                                            | 2007-<br>2017                         |
| Toxoplasma<br>Токсоплазма | -           | 1           | -        | -            | -       | -        | -        | 5               | 14              | 1, no<br>full-text                            | 1997                                  |
| Anthrax<br>Сибирская язва | 1           | 148         | -        | 22           | -       | -        | -        | -               | 422             | 29                                            | 2011-<br>2018                         |
| Tularemia<br>Туляремия    | 33          | 42          | -        | -            | -       | 3        | -        | 4               | 328             | 11                                            | 2015-<br>2018                         |
| Other infections*         |             |             |          |              |         |          |          |                 |                 | 23                                            | 2008-<br>2018                         |

## Other generic searches

| Search term in Russian   | matches | Search term translated to English |
|--------------------------|---------|-----------------------------------|
| Инфекции в живой природе | 7       | Infections in wildlife            |
| Инфекции в дикой природе | 12      | Infections in wildlife            |
| Инфекции в животном мире | 52      | Infections in animal world        |
| Инфекции в фауне         | 30      | Infections in fauna               |

Included in the Article Table (Other\_Rus page in excel) after abstract-text analysis: 3, 2009 – 2017
