# Supplementary material for: Research on Selected Wildlife Infections in the Circumpolar Arctic—A Bibliometric Review
Source: MDPI journal article supplement (doi:10.3390/ijerph191811260), 2022-09-07
Supplement: s1 [file s1]

**Table S2.** Number of articles published by Russian language journals (n = 60). The total number of included articles is 122.

| Journals                                                                                  | Number of articles |
|-------------------------------------------------------------------------------------------|--------------------|
| Паразитология                                                                             | 17                 |
| Проблемы Особо Опасных Инфекций                                                           | 7                  |
| Российский Паразитологический Журнал                                                      | 7                  |
| Достижения Науки И Техники Апк                                                            | 5                  |
| Научный Вестник Ямало-Ненецкого Автономного Округа                                        | 5                  |
| Сибирский Вестник Сельскохозяйственной Науки                                              | 5                  |
| Актуальные Вопросы Ветеринарной Биологии                                                  | 3                  |
| Зоологический Журнал                                                                      | 3                  |
| Исследования Водных Биологических Ресурсов Камчатки И Северо-Западной Части Тихого Океана | 3                  |
| Международный Вестник Ветеринарии                                                         | 3                  |
| Аграрная Наука Евро-Северо-Востока                                                        | 2                  |
| Вестник Бурятской Государственной Сельскохозяйственной Академии Им. В.р. Филиппова        | 2                  |
| Вестник Северо-Восточного Научного Центра Дво Ран                                         | 2                  |
| Вестник Сургутского Государственного Университета                                         | 2                  |
| Вестник Ульяновской Государственной Сельскохозяйственной Академии                         | 2                  |
| Генетика И Разведение Животных                                                            | 2                  |
| Дальневосточный Журнал Инфекционной Патологии                                             | 2                  |
| Известия Санкт-Петербургского Государственного Аграрного Университета                     | 2                  |
| Международный Научно-Исследовательский Журнал                                             | 2                  |
| Наука И Образование: Современные Тренды                                                   | 2                  |
| Российский Журнал Биологических Инвазий                                                   | 2                  |
| Теория И Практика Борьбы С Паразитарными Болезнями                                        | 2                  |
| Труды Карельского Научного Центра Российской Академии Наук                                | 2                  |
| Ученые Записки Петрозаводского Государственного Университета                              | 2                  |
| Asta Biomedica Scientifica                                                                | 1                  |
| Аграрный Вестник Урала                                                                    | 1                  |
| Биология Моря                                                                             | 1                  |
| Бюллетень Физиологии И Патологии Дыхания                                                  | 1                  |
| Вестник Апк Ставрополя                                                                    | 1                  |

|                                                                                              |     |
|----------------------------------------------------------------------------------------------|-----|
| Вестник Государственного Аграрного Университета Северного Зауралья                           | 1   |
| Вестник Казанского Государственного Энергетического Университета                             | 1   |
| Вестник Камчатского Государственного Технического Университета                               | 1   |
| Вестник Красноярского Государственного Аграрного Университета                                | 1   |
| Вестник Мурманского Государственного Технического Университета                               | 1   |
| Вестник Новосибирского Государственного Университета. Серия: Биология, Клиническая Медицина  | 1   |
| Вестник Тюменского Государственного Университета. Экология И Природопользование              | 1   |
| Вопросы Нормативно-Правового Регулирования В Ветеринарии                                     | 1   |
| Евразийское Научное Объединение                                                              | 1   |
| Журнал Инфектологии                                                                          | 1   |
| Известия Российской Академии Наук. Серия Биологическая                                       | 1   |
| Известия Самарского Научного Центра Российской Академии Наук                                 | 1   |
| Медицина Кыргызстана                                                                         | 1   |
| Наука И Мир                                                                                  | 1   |
| Наука И Образование                                                                          | 1   |
| Научные Труды Дальневосточного Государственного Технического Рыбохозяйственного Университета | 1   |
| Пермский Аграрный Вестник                                                                    | 1   |
| Проблемы Экологического Мониторинга И Моделирования Экосистем                                | 1   |
| Профилактическая И Клиническая Медицина                                                      | 1   |
| Российский Ветеринарный Журнал. Мелкие Домашние И Дикие Животные                             | 1   |
| Российский Журнал Проблемы Ветеринарной Санитарии, Гигиены И Экологии                        | 1   |
| Современные Проблемы Науки И Образования                                                     | 1   |
| Современные Тенденции Развития Науки И Технологий                                            | 1   |
| Технологии Гражданской Безопасности                                                          | 1   |
| Труды Вниро                                                                                  | 1   |
| Успехи Современной Биологии                                                                  | 1   |
| Ученые Записки Казанской Государственной Академии Ветеринарной Медицины Им. Н.э. Баумана     | 1   |
| Фундаментальные И Прикладные Исследования В Современном Мире                                 | 1   |
| Хранение И Переработка Сельхозсырья                                                          | 1   |
| Экология                                                                                     | 1   |
| Якутский Медицинский Журнал                                                                  | 1   |
| Total number of included articles                                                            | 122 |
