# Supplementary material for: Research on Selected Wildlife Infections in the Circumpolar Arctic—A Bibliometric Review
Source: MDPI journal article supplement (doi:10.3390/ijerph191811260), 2022-09-07
Supplement: s1 [file s1]

**Table S1.** Number of articles published by English language journals (n = 77). The total number of included articles is 228.

| Journal                                                | Number of articles |
|--------------------------------------------------------|--------------------|
| Journal of Wildlife Diseases                           | 48                 |
| Veterinary Parasitology                                | 17                 |
| Parasitology Research                                  | 13                 |
| Journal of Parasitology                                | 10                 |
| PLoS ONE                                               | 9                  |
| Parasitology                                           | 8                  |
| Veterinary Record                                      | 7                  |
| Parasites & Vectors                                    | 6                  |
| Acta Veterinaria Scandinavica                          | 4                  |
| Archives of Virology                                   | 4                  |
| Canadian Journal of Zoology                            | 4                  |
| Diseases of Aquatic Organisms                          | 4                  |
| Journal of Veterinary Diagnostic Investigation         | 4                  |
| Virology Journal                                       | 4                  |
| Avian Diseases                                         | 3                  |
| Emerging Infectious Diseases                           | 3                  |
| IJP: Parasites and Wildlife                            | 3                  |
| Journal of Fish Diseases                               | 3                  |
| Oikos                                                  | 3                  |
| Polar Biology                                          | 3                  |
| European Communicable Disease Bulletin                 | 2                  |
| Hydrobiologia                                          | 2                  |
| Infection, Genetics and Evolution                      | 2                  |
| Journal of Clinical Microbiology                       | 2                  |
| Journal of Ichthyology                                 | 2                  |
| Journal of the American Veterinary Medical Association | 2                  |
| Polar Research                                         | 2                  |
| Research in Veterinary Science                         | 2                  |
| Veterinary Microbiology                                | 2                  |
| Veterinary Research                                    | 2                  |

|                                                              |   |
|--------------------------------------------------------------|---|
| Veterinary Research Communications                           | 2 |
| Acta Parasitologica                                          | 1 |
| American Journal of Tropical Medicine and Hygiene            | 1 |
| Aquaculture                                                  | 1 |
| Berliner und Munchener tierärztliche Wochenschrift           | 1 |
| BMC Veterinary Research                                      | 1 |
| Bulletin- European Association of Fish Pathologists          | 1 |
| Canadian Field Naturalist                                    | 1 |
| Canadian Journal of Fisheries and Aquatic Sciences           | 1 |
| Canadian Journal of Microbiology                             | 1 |
| Canadian Veterinary Journal                                  | 1 |
| Comparative Immunology, Microbiology and Infectious Diseases | 1 |
| Comparative Parasitology                                     | 1 |
| Cross-Canada Disease Report                                  | 1 |
| EcoHealth                                                    | 1 |
| Ecological Applications                                      | 1 |
| Epidemiology and Infection                                   | 1 |
| Food Anal. Methods                                           | 1 |
| Foodborne Pathogens and Disease                              | 1 |
| Functional Ecology                                           | 1 |
| Helminthologia                                               | 1 |
| Integrative Zoology                                          | 1 |
| International Journal for Parasitology                       | 1 |
| Journal of Animal Ecology                                    | 1 |
| Journal of Applied Microbiology                              | 1 |
| Journal of Fish Biology                                      | 1 |
| Journal of Food Protection                                   | 1 |
| Journal of General Virology                                  | 1 |
| Journal of Helminthology                                     | 1 |
| Journal of Medical Entomology                                | 1 |
| Journal of Veterinary Medicine                               | 1 |
| Kleintierpraxis                                              | 1 |
| Marine Biology Research                                      | 1 |
| Med Parazitol (Mosk).                                        | 1 |
| Mem Inst Oswaldo Cruz                                        | 1 |
| Parazitologiya                                               | 1 |

|                                     |     |
|-------------------------------------|-----|
| Polar Science                       | 1   |
| Polish Polar Research               | 1   |
| Rev. Sci. Tech.                     | 1   |
| The Royal Society                   | 1   |
| Transboundary and Emerging Diseases | 1   |
| Ugeskrift for laeger                | 1   |
| Vector-Borne and Zoonitic Diseases  | 1   |
| Veterinary Dermatology              | 1   |
| Virology                            | 1   |
| Zoologicheskii Zhurnal              | 1   |
| Zoonoses Public Health              | 1   |
| <hr/>                               |     |
| Total number of articles            | 228 |
| <hr/>                               |     |
