# Supplementary material for: Research on Selected Wildlife Infections in the Circumpolar Arctic—A Bibliometric Review
Source: MDPI journal article supplement (doi:10.3390/ijerph191811260), 2022-09-07
Supplement: s1 [file Table S3.xlsx]

## Sheet: Sheet1
Infections in mammals and birds
Notes on the table: numbers in (x) indicate that the infection was mentioned in an article that included more than one infection.
Blue text of a number indicates that the infection was only found in articles that mentioned multiple infections
Grey tan highlighted infections described in detail in the article
Orange tan highligted infections that have the high number of publications in both english and russian databases but not described in detail in the article
Total number of articles are at the end of the table
	Prion				Virus				Bacteria				Parasite				Fungi					Unknown
		Eng	Rus			Eng	Rus			Eng	Rus			Eng	Rus			Eng	Rus			Eng	Rus
	Chronic Wasting Disease	2	0 (1)		Avian influenza	28 (1)	12 (2)		Actinobacillus capsulatus	1	0		Alveococcus multilocularis	0	0 (2)		Pneumocystis spp.	0 (1)	0		Necrotizing encephalitis (NE)	1
					Bluetongue virus	1	0		Anaplasma phagocytophilium	0 (1)	0		Angiostrongylus vasorum	0 (1)	0
					Bovine viral diarrhea virus	0 (1)	0		Bacillus anthracis	0	17 (8)		Anoplocephalidae spp.	0 (1)	0 (1)
					Calicivirus	0 (2)	0		Bartonella	1 (1)	0		Babesia	0 (1)	0
					Canine Viruses (distemper virus, adenovirus, hepatitis, influenza, parainfluenza, coronavirus, parvovirus, Neospora caninum, herpesvirus)	5 (11)	0 (1)		Borrelia burgdorferi	0 (1)	1		Baylisascaris spp.	1 (2)	0
					Carnivore protoparovirus	0 (1)	0		Brucella	9 (4)	6 (6)		Besnoitia spp.	3	0
					Dolphin rhabdovirus	0 (1)	0		Campylobacter spp.	1 (3)	0		Bunostomum trigonocephalum	0 (1)	0
					European Brown hare syndrome	1	0		Clostridium perfringens	1 (1)	0		Capillaria spp. / Capillariidae	0 (3)	0
					Feline viruses (panleukopenia, herpesvirus, leukaemia virus, coronavirus)	0 (2)	0		Escherichia coli	2 (2)	0		Cephenomya trompe	0 (2)	0
					Hepatitis E	2	0		Ehrlichia phagocytophilium	0 (1)	0		Crenosoma vulpis	0 (1)	0
					Herpesvirus (Alphaherpesvirus, Betaherpesvirus, Gammaherpervirus, Caprine herpesvirus, Ovine herpesvirus, Feline Virual Rhinotracheitis, Cervid herpesvirus 2, Phocine herpesvirus)	8 (7)	0 (1)		Enterococcus spp.	0 (1)	0		Cryptosporidium	1 (4)	0
					Malignant Catarrhal Fever Virus	1	0		Francisella tularensis	1 (2)	5 (1)		Ctenocephalides	0	1
					Morbillivirus (Phocine Distemper Virus, Dolphin morbillibirus, Porpoise morbillivirus)	3 (3)	0		Hemotropic Mycoplasma spp.	0 (1)	0		Cystoisospora	0 (1)	0
					Papillomavirus (Rangifer tarandus papillomavirus 2)*	0 (1)	0		Leptospira spp.	0 (3)	0 (1)		Deer ked (Lipoptena cervi)	1	0
					Parainfluenza virus type 3 P13	0 (1)	0		Listeria spp.	0 (1)	0		Dictyocaulus spp.	2	0
					Parvovirus (Feline panleukopenia FPV)	0 (1)	0		Mycobacterium avium subspecies paratuberculosis	2 (1)	0		Diphyllobothrium spp.	7 (7)	0 (3)
					Pestivirus (bovine viral diarrhea virus)	0 (3)	0 (1)		Necrobacteriosis / necrobacillosis	0	1 (5)		Dirofilaria spp.	0	0 (1)
					Pox viruses (Parapoxvirus, Orthopoxviruses)	3	0		Salmonella spp.	3 (4)	0		Echinococcus spp.	6 (1)	0 (3)
					Pseudorabies	0	0 (1)		Yersinia spp.	0 (3)	0		Eimeria spp.	2 (2)	0
					Puumala virus	1	0						Elaphostrongylus rangiferi	2 (1)	0
					Rabies	4 (3)	1 (3)						Encephalitozoon cuniculi	2	0
					Reovirus	0 (1)	0						Giardia	1 (4)	0
					Snowshoe hare virus	1	0						Hypoderma tarandi/Edemagenoz	4 (3)	1 (1)
					Tick-borne encephalitis virus	1	0						Ixodes ricinus tick	1	0
													Linguatula arctica	0 (2)	0
													Marshallagia marshalli	1 (4)	0
													Mazamastrongylus dagestanica	0 (1)	0
													Mesocestoides	0 (1)	0
													Mosgovoyia pectinata	0 (1)	0
													Nematodirella spp.	0 (2)	0
													Nematodirus spp.	0 (2)	0
													Neospora caninum	0 (4)	0
													Obeliscoides cuniculi	0 (1)	0
													Ostertagia spp.	1 (6)	0
													Protostrongylus spp.	0 (2)	0
													Protostrongylid	2	0
													Rumenfilaria andersoni	2	0
													Sarcocystis spp.	3	0
													Sarcoptes scabiei	2	0
													Setaria spp.	4	0
													Strongyloides spp.	0 (1)	0
													Taenia spp.	0 (2)	0
													Teladorsagia circumcincta	0 (2)	0
													Toxoplasma gondii	8 (10)	0 (1)
													Trichinella spp.	13 (4)	19 (3)
													Trichostrongylus spp.	0 (2)	0
													Trichuris spp.	0 (1)	0
													Uncinaria stenocephala	0 (1)	0
Total	Prion	Eng	Rus		Virus	Eng	Rus		Bacteria	Eng	Rus		Parasite	Eng	Rus		Fungi	Eng	Rus
Without multiples	2	2	0		72	59	13		51	21	30		90	69	21		0	0	0
Multiple totals	1	0	1		48	39	9		51	30	21		98	83	15		1	1	0
Combined totals	3	2	1		120	98	22		102	51	51		188	152	36		1	1	0
